# Supplementary material for: Characterization of Nanoparticle Batch-To-Batch Variability
Source: MDPI journal article supplement (doi:10.3390/nano8050311), 2018-05-08
Supplement: s1 [file s1]

### S1-1 Trace impurities

### S1-1 Trace impurities

#### *Any further Information*

The most sensitive analytical methods have been chosen to determine most other elements than the nanomaterials consisted of. Two methods have been used ICP-OES (optical emission spectrometry with inductively coupled plasma) for elements with concentrations above 10 ng/mL or ICP-MS (mass spectrometry with inductively coupled plasma) below 10 ng/mL. Because of the sensitivity of these methods precleaned vessels, subboiled or ultrapure acids and deionized water (18  $\Omega/\text{cm}^2$ ) have been used. To identify matrix effects and spectral interferences the purest available substances of  $\text{SiO}_2$ , Ti metal, ZnO or  $\text{Ce}(\text{NO}_3)_3 \cdot (6-7)\text{H}_2\text{O}$  have been analyzed to. Blank solutions have been prepared with the same acid and water to control the blank.

The main compounds have been determined additionally either to show the batch to batch variability and/or to correlate the impurity concentration. For precise element determination ICP-OES and the use of internal standard provides the lowest repeatability.

Nanomaterials dispersed in water or as powder has to be dissolved in acids previous to spectrometric investigation:

**SiO<sub>2</sub>:** 0.4 g nanopowder was dissolved in 2 mL HF ultrapure and diluted to 100 mL or 5 mL of homogenized dispersion was acidified with 0.5 mL HF ultrapure and diluted to 15 mL with water. For ICP-MS further dilution was necessary.

**ZnO:** 0.05 g nanopowder was dissolved in 2 mL HCl subboiled at 80 °C and made up to volume 50 mL with deionized water. For ICP-MS further dilution was necessary.

**TiO<sub>2</sub>:** 5 mL of homogenized dispersion was acidified with 1 mL HF ultrapure and 0.2 mL  $\text{HNO}_3$  subboiled. After heating at 80 °C the clear solution was diluted to 15 mL with deionized water. For ICP-MS further dilution was necessary.

**CeO<sub>2</sub>:** 5 mL of homogenized dispersion was acidified with 2 mL  $\text{HNO}_3$  subboiled and  $\text{H}_2\text{O}_2$  suprapure. After heating at 80 °C the clear solution was diluted to 10 mL with deionized water. For ICP-MS further dilution was necessary.

## S1-2 Solubility

|                                                                                                                                                                                                                                                                                                                                                                                                                                                                                                                                                                                                                                                                                                                                                                                                                                                                                                                                                                                                                                                                                                                                                                                                                                                                                                                                                                                                                                                                                                                                                                                                                                                                                                                                                                                                                                                                                                                                                                                                                                                                                                                                                                                                                                                                                                                                                                             |                                                                                                                                                                                                                                                                       |
|-----------------------------------------------------------------------------------------------------------------------------------------------------------------------------------------------------------------------------------------------------------------------------------------------------------------------------------------------------------------------------------------------------------------------------------------------------------------------------------------------------------------------------------------------------------------------------------------------------------------------------------------------------------------------------------------------------------------------------------------------------------------------------------------------------------------------------------------------------------------------------------------------------------------------------------------------------------------------------------------------------------------------------------------------------------------------------------------------------------------------------------------------------------------------------------------------------------------------------------------------------------------------------------------------------------------------------------------------------------------------------------------------------------------------------------------------------------------------------------------------------------------------------------------------------------------------------------------------------------------------------------------------------------------------------------------------------------------------------------------------------------------------------------------------------------------------------------------------------------------------------------------------------------------------------------------------------------------------------------------------------------------------------------------------------------------------------------------------------------------------------------------------------------------------------------------------------------------------------------------------------------------------------------------------------------------------------------------------------------------------------|-----------------------------------------------------------------------------------------------------------------------------------------------------------------------------------------------------------------------------------------------------------------------|
| <i>Water Solubility- dissolution test</i>                                                                                                                                                                                                                                                                                                                                                                                                                                                                                                                                                                                                                                                                                                                                                                                                                                                                                                                                                                                                                                                                                                                                                                                                                                                                                                                                                                                                                                                                                                                                                                                                                                                                                                                                                                                                                                                                                                                                                                                                                                                                                                                                                                                                                                                                                                                                   | <p>Category:<br/>C. Particle Characterisation in and ex-situ and/or</p> <p>Institute: Institut Català de Nanotecnologia (ICN)<br/>Location: Campus UAB<br/>Contact Details of Technology Expert:<br/>Jordi Piella<br/>Tel. +34-937374624<br/>Jordi.piella@icn.cat</p> |
| <p><i>Short technology description</i></p> <p>Water solubility is defined as the saturation mass concentration of the substance in water at a given temperature. However, when talking about nanoparticles it may be a relatively misleading term and a more accurate definition is necessary. Two main processes exist when adding nanoparticles in a specific environment: dispersion and dissolution. The first one is related to the number of particles in suspension, while the second one refers to the release of ions from the particles. The OCDE procedure does not clearly differentiate these two concepts. Moreover, dissolution and dispersion are often mutually affected. In the present project, the solubility of a nanoparticle is understood as the concentration of free ions in the solution in equilibrium with the particle in a controlled environment.</p> <p><i>Material</i></p> <p>All experiments are performed in Milli-Q® water. Concentration of ions in the sample is determined spectrophotometrically and the standard procedure depends on the ions to be determined.</p> <p><i>Procedure</i></p> <p>Test is performed in Milli-Q® water at 25°C, circumneutral pH and under static equilibrium conditions to avoid interferences. The concentration of the substance is chosen to a value that it is approximated to a concentration used for in vitro experiments.</p> <p>The sample is diluted with Milli-Q® water until a concentration of 100 ppm and incubated at 25°C. If it is in powder form, the solution is sonicated (Brandson 2510) for 15 min to achieve well dispersion. Aliquots are taken at different time points (until 30 days), centrifuged at high speed and the supernatant filtrated with the use of a regenerated cellulose centricone (Millipore) to ensure removal of all the nanoparticles from the sample. The amount of ions absorbed by the filter is calculated with the use of standards. Finally, the concentration of free ions is measured spectrophotometrically (UV-Vis spectrophotometer, Shimadzu UV-2401) with the corresponding standard procedure for each substance (SiO<sub>2</sub>[13], ZnO[14], TiO<sub>2</sub>[15, 16]). Due to a lack in the procedure, tests for Polystyrene and CeO<sub>2</sub> nanoparticles were not done. Further discussion is presented in later sections.</p> |                                                                                                                                                                                                                                                                       |
| <p><i>Main Features (Equipment capabilities):</i></p> <p>UV-Vis spectrophotometer (Shimadzu UV-2401) for absorbance measurement from 200 nm to 900 nm</p>                                                                                                                                                                                                                                                                                                                                                                                                                                                                                                                                                                                                                                                                                                                                                                                                                                                                                                                                                                                                                                                                                                                                                                                                                                                                                                                                                                                                                                                                                                                                                                                                                                                                                                                                                                                                                                                                                                                                                                                                                                                                                                                                                                                                                   |                                                                                                                                                                                                                                                                       |
| <p><i>Typical Samples &amp; Images:</i></p>                                                                                                                                                                                                                                                                                                                                                                                                                                                                                                                                                                                                                                                                                                                                                                                                                                                                                                                                                                                                                                                                                                                                                                                                                                                                                                                                                                                                                                                                                                                                                                                                                                                                                                                                                                                                                                                                                                                                                                                                                                                                                                                                                                                                                                                                                                                                 |                                                                                                                                                                                                                                                                       |

*Any further Information:*

- OECD guideline for the testing of chemicals. Test 105.[\[12\]](#)
- 4500-SiO<sub>2</sub> D. Heteropoly Blue Method: Greenberg, A. E., Standard methods for the examination of water and wastewater. 16<sup>th</sup> edition. American Public Health Association, Washington, 1985.
- 3500-Zn F. Zincon Method: Greenberg, A. E., Standard methods for the examination of water and wastewater. 18<sup>th</sup> edition. American Public Health Association, Washington, 1985.

### S1-3 Crystalline phase

|                                                                                                                                                                                                                                                                                                                                                                                                                                                                                                                                                                                                                                                                       |                                                                                                                                                                                                                                                                                                                                                                                                                                                                                              |
|-----------------------------------------------------------------------------------------------------------------------------------------------------------------------------------------------------------------------------------------------------------------------------------------------------------------------------------------------------------------------------------------------------------------------------------------------------------------------------------------------------------------------------------------------------------------------------------------------------------------------------------------------------------------------|----------------------------------------------------------------------------------------------------------------------------------------------------------------------------------------------------------------------------------------------------------------------------------------------------------------------------------------------------------------------------------------------------------------------------------------------------------------------------------------------|
| <p><i>Electron Microscopy and Focussed Ion Beam Nanostructuring</i></p> <p>Technology:</p> <ul style="list-style-type: none"> <li>• Scanning Electron Microscopy (SEM)</li> <li>• Transmission Electron Microscopy (TEM)</li> <li>• Focussed Ion Beam (FIB) Nanostructuring</li> </ul> <p>Equipment:</p> <ul style="list-style-type: none"> <li>• TEM FEI TITAN 80-300 with Cs image corrector, EDX spectrometer, monochromator, and high-resolution imaging energy filter</li> <li>• Philips CM200 FEG/ST</li> <li>• ZEISS922 Omega</li> <li>• Field-emission (FE)-SEM FEI Quanta 650 ESEM</li> <li>• FE-SEM ZEISS LEO 1530</li> <li>• FIB FEI Strata 400</li> </ul> | <p>Category:</p> <p>C. Particle Characterisation in- and ex-situ</p> <p>Institute: Laboratory for Electron Microscopy (LEM), KIT</p> <p>Location:</p> <p>Laboratory for Electron Microscopy (LEM)<br/>Karlsruhe Institute of Technology (KIT)<br/>Campus South, Building 30.22<br/>Engesserstr. 7<br/>D-76131 Karlsruhe<br/>Germany</p> <p>Contact Details of Technology Expert:</p> <p>Name: Dr. Reinhard Schneider<br/>Phone: +49 721 608-43719<br/>E-mail: reinhard.schneider@kit.edu</p> |
|-----------------------------------------------------------------------------------------------------------------------------------------------------------------------------------------------------------------------------------------------------------------------------------------------------------------------------------------------------------------------------------------------------------------------------------------------------------------------------------------------------------------------------------------------------------------------------------------------------------------------------------------------------------------------|----------------------------------------------------------------------------------------------------------------------------------------------------------------------------------------------------------------------------------------------------------------------------------------------------------------------------------------------------------------------------------------------------------------------------------------------------------------------------------------------|

To determine the inner structure of solid-body particles, transmission electron microscopy (TEM) techniques are a well-established analytical means besides, e.g., X-ray diffraction (XRD) (Figure 1a). In more detail, the real structure of a material can directly be determined by high-resolution TEM (HRTEM) imaging, where the contrast features do clearly reveal whether the particles are amorphous or crystalline.



Fig. 1: HRTEM image of silica (a) and CeO<sub>2</sub> nanoparticles (b), SAED pattern recorded from a large number of CeO<sub>2</sub> nanoparticles (c).

Exemplary, this can be recognized from the HRTEM images in Figs. RS1a and b), showing SiO<sub>2</sub> nanoparticles of the batch SiNP002 with amorphous structure and an individual single-crystalline CeO<sub>2</sub> particle (CeO<sub>2</sub>NP\_006) of approximately 12 nm in size, respectively. For the latter particle the viewing direction is along the [110] zone axis and the corresponding distances of visible {111} and {002} lattice planes amount to about 0.312 nm and 0.271 nm. Nowadays, through the use of state-of-the-art instruments equipped with electron-optical systems for correcting the spherical aberration of the objective lens, a lateral resolution of 0.1 nm and better can be achieved, which allows to visualize clusters of atoms or even single metal atoms lying on extremely thin carbon films (Figure 1b, Figure 1c). However, the accuracy in measuring the crystal-lattice spacing strongly depends on the quality of the microscope calibration, which is usually done by reference samples with known structure.

Keeping this in mind, differences in determining lattice parameters from laboratory to laboratory can also be caused by not well performed calibration procedures. In general, reliable structural data with  $\pm 0.005$  nm as a typical number can be obtained by HRTEM imaging. Thus, XRD measurements, yielding lattice parameters in nanometers with uncertainties in the 5th digit, are more accurate [RS5]. In addition to imaging techniques, structure analyses are also possible in TEM by applying electron-diffraction methods as given via the selected-area electron diffraction (SAED) pattern of ceria nanoparticles (batch CeO<sub>2</sub>NP\_009) in Fig. RS1c. In this figure the experimentally obtained SAED pattern is compared with a simulated one, which distinctly furnishes proof of the presence of CeO<sub>2</sub>. Thus as shown in this example, electron diffraction gives information not only about the lattice parameters and symmetry of a crystal, but also about the stoichiometry of a compound, i.e. the present chemical phase.

*Any further Information:*

## S1-4 Crystalline Size

|                                                                                                                                                                                                                                                                                                                                                                                                                                                                                                                                                                                                                                                                                                                                                                                                                                                                                                                                                                                                                                                                                                                                                                                                                                                                                     |                                                                                                                                                                                                                                                             |
|-------------------------------------------------------------------------------------------------------------------------------------------------------------------------------------------------------------------------------------------------------------------------------------------------------------------------------------------------------------------------------------------------------------------------------------------------------------------------------------------------------------------------------------------------------------------------------------------------------------------------------------------------------------------------------------------------------------------------------------------------------------------------------------------------------------------------------------------------------------------------------------------------------------------------------------------------------------------------------------------------------------------------------------------------------------------------------------------------------------------------------------------------------------------------------------------------------------------------------------------------------------------------------------|-------------------------------------------------------------------------------------------------------------------------------------------------------------------------------------------------------------------------------------------------------------|
| <p><i>Equipment Name:</i></p> <p>XRD</p>                                                                                                                                                                                                                                                                                                                                                                                                                                                                                                                                                                                                                                                                                                                                                                                                                                                                                                                                                                                                                                                                                                                                                                                                                                            | <p>Category:<br/>C. Particle Characterisation in and ex-situ<br/>Institute: Institut Català de Nanotecnologia (ICN)<br/>Location: Campus UAB<br/>Contact Details of Technology Expert:<br/>Jordi Piella<br/>Tel. +34-937374624<br/>Jordi.piella@icn.cat</p> |
| <p><i>Short technology description / Overview</i></p> <p>Maybe the most versatile and widely used characterization tool for materials science and now also for nanotechnology. XRD is based on the optical interferences when a monochromatic radiation passes through a gap that has the same length than its wavelength. As X-Ray have similar wavelengths than the interatomic lengths inside crystals (in the order of Angstroms) when pass through a crystal, this acts as a diffracting net: diffracts the x-rays with a concrete direction and intensity and a pattern of peaks is obtained</p> <p><i>Procedure</i></p> <p>XRD measurements are performed using a powder diffractometer (PANalytical X'Pert) operating with a Cu K<math>\alpha</math> radiation source (<math>\lambda=1.541\text{\AA}</math>). If the sample is suspended in liquid phase, the solid is extracted out by centrifugation and dried in an oven at 70°C to eliminate all the moisture.</p> <p>For crystalline size determination, <math>D_{hkl}</math> is calculated applying the Scherrer formula, <math>D_{hkl} = 0.9 \lambda / B_{hkl} \cos\theta</math>, to the line width, <math>B_{hkl}</math>, at half maximum corrected for the instrumental broadening assuming Gaussian profiles.</p> |                                                                                                                                                                                                                                                             |
| <p><i>Equipment:</i></p> <ul style="list-style-type: none"> <li>• PANalytical X'Pert diffractometer operating with a Cu K<math>\alpha</math> radiation source (<math>\lambda=1.541\text{\AA}</math>) or Co K<math>\alpha</math> (<math>\lambda=1.789\text{\AA}</math>).</li> <li>• Composition of the NPs (and purity)</li> <li>• Arrangement of the atoms inside the NPs (crystalline phase)</li> <li>• Size of the crystal using Scherrer's formula</li> <li>• Size, crystal face, purity, crystal defects, degree of oxidation</li> <li>• Sonicator (Branson 2510)</li> <li>• Centrifuge (Hermle Z36HK)</li> </ul>                                                                                                                                                                                                                                                                                                                                                                                                                                                                                                                                                                                                                                                               |                                                                                                                                                                                                                                                             |
| <p><i>Typical Samples &amp; Images:</i></p> <div data-bbox="603 1552 1031 1850" data-label="Figure"> </div> <p>Figure 1: XRD spectrum of commercial Degussa P25 purchased from Sigma-Aldrich.</p>                                                                                                                                                                                                                                                                                                                                                                                                                                                                                                                                                                                                                                                                                                                                                                                                                                                                                                                                                                                                                                                                                   |                                                                                                                                                                                                                                                             |
| <p><i>Any further Information:</i></p>                                                                                                                                                                                                                                                                                                                                                                                                                                                                                                                                                                                                                                                                                                                                                                                                                                                                                                                                                                                                                                                                                                                                                                                                                                              |                                                                                                                                                                                                                                                             |

## S1-5 Crystallite-size / particle-size distribution by TEM

|                                                                                                                                                                                                                                                                                                                                                                                                                                                                                                                                                                                                                                                                                                                                                                                                                                                                                                                                                                                                                                                                                                                                                                                                                                                                                                                                                                                                                                                                                                                                                                                                                                                                                                                                                                                                                                            |                                                                                                                                                                                                                                                                                                                                                                                                                                                                                                                 |
|--------------------------------------------------------------------------------------------------------------------------------------------------------------------------------------------------------------------------------------------------------------------------------------------------------------------------------------------------------------------------------------------------------------------------------------------------------------------------------------------------------------------------------------------------------------------------------------------------------------------------------------------------------------------------------------------------------------------------------------------------------------------------------------------------------------------------------------------------------------------------------------------------------------------------------------------------------------------------------------------------------------------------------------------------------------------------------------------------------------------------------------------------------------------------------------------------------------------------------------------------------------------------------------------------------------------------------------------------------------------------------------------------------------------------------------------------------------------------------------------------------------------------------------------------------------------------------------------------------------------------------------------------------------------------------------------------------------------------------------------------------------------------------------------------------------------------------------------|-----------------------------------------------------------------------------------------------------------------------------------------------------------------------------------------------------------------------------------------------------------------------------------------------------------------------------------------------------------------------------------------------------------------------------------------------------------------------------------------------------------------|
| <p><i>Electron Microscopy and Focussed Ion Beam Nanostructuring</i></p> <p>Technology:</p> <ul style="list-style-type: none"> <li>• Scanning Electron Microscopy (SEM)</li> <li>• Transmission Electron Microscopy (TEM)</li> <li>• Focussed Ion Beam (FIB) Nanostructuring</li> </ul> <p>Equipment:</p> <ul style="list-style-type: none"> <li>• TEM FEI TITAN 80-300 with Cs image corrector, EDX spectrometer, monochromator, and high-resolution imaging energy filter</li> <li>• Philips CM200 FEG/ST</li> <li>• ZEISS922 Omega</li> <li>• Field-emission (FE)-SEM FEI Quanta 650 ESEM</li> <li>• FE-SEM ZEISS LEO 1530</li> <li>• FIB FEI Strata 400</li> </ul>                                                                                                                                                                                                                                                                                                                                                                                                                                                                                                                                                                                                                                                                                                                                                                                                                                                                                                                                                                                                                                                                                                                                                                      | <p>Category:<br/><b>C. Particle Characterisation in- and ex-situ</b></p> <p>Institute: Laboratory for Electron Microscopy (LEM), KIT</p> <p>Location:<br/>Laboratory for Electron Microscopy (LEM)<br/>Karlsruhe Institute of Technology (KIT)<br/>Campus South, Building 30.22<br/>Engesserstr. 7<br/>D-76131 Karlsruhe<br/>Germany</p> <p>Contact Details of Technology Expert:<br/><b>Name:</b> Dr. Reinhard Schneider<br/><b>Phone:</b> +49 721 608-43719<br/><b>E-mail:</b> reinhard.schneider@kit.edu</p> |
| <p>Because of its high lateral resolution, TEM is certainly well suited for measuring the size of an individual nanoparticle. However, problems can arise when nanoparticles are strongly agglomerated, hindering to distinguish between single particles. Moreover, the specific shape of a particle – i.e. spherical, plate-like, completely irregular, and so on – can complicate particle-size analyses since then a definition is needed what “particle size” does mean. Hence, from this point of view the simplest and therefore also best case for particle-size analysis is well-separated spherical particles. Here, automated routines of digital image analysis can often be applied successfully to find the size distribution. For more complicated configurations like, e.g., agglomerated particles or particles with elongated form, there are sometimes solutions of the above-mentioned problems which combine manual analyses with automated ones. Few corresponding examples of our QNano project, namely where fully digital routines failed, are presented in the following.</p> <div data-bbox="204 1391 1385 1774">  </div> <p>Fig. 1: Original TEM image of silica nanoparticles (a), image after background equalization (b), and with marked particles by applying a gray-level threshold (c).</p> <p>The first example of silica nanoparticles concerns agglomeration. As demonstrated in Fig. 1, even for slightly agglomerated nanoparticles the sizes cannot be measured automatically. Fig. 1a shows the raw-data image taken from the SiO<sub>2</sub> particles (batch SiINP007), exhibiting a nearly similar size. Obviously, they touch each other which causes problems in the automatic particle separation.</p> |                                                                                                                                                                                                                                                                                                                                                                                                                                                                                                                 |

In addition, before performing any digital image analysis, the background-brightness level has to be corrected in the case of not evenly illuminated pictures (there is a gradual increase in intensity from the upper right to the lower left, see arrow in Fig. 1a). This can be done by suited correction tools implemented within different image-processing programs (e.g., Adobe Photoshop). Then, after this background equalization (Fig. 1b) a particle-analysis tool as, e.g., the software package Digital Micrograph (Gatan) can be applied. First, a threshold in the gray values is set to select particles. As particles are connected, the threshold must be adjusted to identify single particles (cf. Fig. 1c). Since the further analysis counts slightly smaller particles, this discrepancy is measured and added to determined particle sizes. Finally, the results of the digital image analysis are filtered to rule out interconnected particles.

As imaginable, the size distribution of strongly interconnected particles cannot be analyzed directly with this routine. In this case, a possible way-out is a fit-by-eye of ellipses to discernible particles as shown in Fig. 2 for silica nanoparticles (batch SilNP010). The ellipses can be further processed with the above-mentioned automatic routine. Since the chosen ellipse areas are smaller than the real particles, after analysis a certain offset value has to be added to the measured size.



Fig. 2: Original TEM image of strongly interconnected silica nanoparticles (a), same image with drawn ellipses for further digital image analysis (b).

As evident from Fig. 2 the particles are only partly analyzed as the ellipses must not touch each other for the applied processing technique (i.e. Digital Micrograph). Also not all particles have an ellipsoid shape, so this procedure introduces some errors. To overcome this problem, another software tool was applied, as shown in Fig. 3. In Fig. 3a the particles have irregular shapes, so their contours were drawn free-hand. The situation is quite different for the CeO<sub>2</sub> nanoparticles shown in Fig. RS4b. In this projection, where the particles appear rhombus-like, their contours were marked with a polygon tool in the image analysis software (i.e. Adobe Photoshop). Afterwards the contours of all particles were analyzed automatically. The output of the routine can be varied widely, e.g. a circular diameter can be calculated from the circumferences of the individual particles (Fig. 3a) or their length and width can be measured (Fig. 3). The advantage of this method is the analysis of the individual contours, so overlapping particles pose no difficulties.



Fig. 3: HRTEM image of CeO<sub>2</sub> nanoparticles, (a) batch CeO<sub>2</sub>NP\_002 and (b) CeO<sub>2</sub>NP\_007. For determining the particle-size distribution either irregularly-shaped contours (a) or polygon-like ones (b) were chosen to mark individual nanoparticles and to measure their sizes.

#### References

- [1] D.B. Williams, C.B. Carter, Transmission Electron Microscopy - A Textbook for Materials Science, Springer Science+Business Media, New York, 2009.
- [2] Q. Zhang, J. Xie, Y. Yu, J. Yang, J.Y. Lee, Tuning the crystallinity of Au nanoparticles, *small* 6 (2010), 523-527.
- [3] H. Hofmeister, Forty years study of fivefold twinned structures in small particles and thin films, *Cryst. Res. Technol.* 33 (1998), 3-25.
- [4] K. Dub, F. Ernst, M.C. Pelsozy, J. Barthel, K. Tillmann, Expansion of interatomic distances in platinum catalyst nanoparticles, *Acta Materialia* 58 (2010) 836–845.
- [5] B. Gamm, H. Blank, R. Popescu, R. Schneider, A. Beyer, A. Götzhäuser, D. Gerthsen, Quantitative high-resolution transmission electron microscopy of single atoms, *Microscopy and Microanalysis* 18 (2012), 212–217.
- [6] F.H. Herbstein, How precise are measurements of unit-cell dimensions from single crystals?, *Acta Cryst. B* 56 (2000), 547-557.

Any further Information:

## S1-6a Representative Electron Microscopy (TEM) picture(s)

|                                                                                                                                                                                                                                                                                                                                                                                                                                                                                                                                                                                                                                                                                                                                                                                                                                                                                                                                                                                                                                                                                                                                                                                                                                                                                                                                                                                                                                                                                                                                                                                                                                                                                                      |  |                                                                                                                                                                                                                                                                                                            |  |
|------------------------------------------------------------------------------------------------------------------------------------------------------------------------------------------------------------------------------------------------------------------------------------------------------------------------------------------------------------------------------------------------------------------------------------------------------------------------------------------------------------------------------------------------------------------------------------------------------------------------------------------------------------------------------------------------------------------------------------------------------------------------------------------------------------------------------------------------------------------------------------------------------------------------------------------------------------------------------------------------------------------------------------------------------------------------------------------------------------------------------------------------------------------------------------------------------------------------------------------------------------------------------------------------------------------------------------------------------------------------------------------------------------------------------------------------------------------------------------------------------------------------------------------------------------------------------------------------------------------------------------------------------------------------------------------------------|--|------------------------------------------------------------------------------------------------------------------------------------------------------------------------------------------------------------------------------------------------------------------------------------------------------------|--|
| <i>Electron Microscopy and Focussed Ion Beam Nanostructuring</i>                                                                                                                                                                                                                                                                                                                                                                                                                                                                                                                                                                                                                                                                                                                                                                                                                                                                                                                                                                                                                                                                                                                                                                                                                                                                                                                                                                                                                                                                                                                                                                                                                                     |  | Category:<br>C. Particle Characterisation in- and ex-situ                                                                                                                                                                                                                                                  |  |
| Technology: <ul style="list-style-type: none"><li>• Scanning Electron Microscopy (SEM)</li><li>• Transmission Electron Microscopy (TEM)</li><li>• Focussed Ion Beam (FIB) Nanostructuring</li></ul>                                                                                                                                                                                                                                                                                                                                                                                                                                                                                                                                                                                                                                                                                                                                                                                                                                                                                                                                                                                                                                                                                                                                                                                                                                                                                                                                                                                                                                                                                                  |  | Institute: Laboratory for Electron Microscopy (LEM), KIT                                                                                                                                                                                                                                                   |  |
| Equipment: <ul style="list-style-type: none"><li>• TEM FEI TITAN 80-300 with Cs image corrector, EDX spectrometer, monochromator, and high-resolution imaging energy filter</li><li>• Philips CM200 FEG/ST</li><li>• ZEISS922 Omega</li><li>• Field-emission (FE)-SEM FEI Quanta 650 ESEM</li><li>• FE-SEM ZEISS LEO 1530</li><li>• FIB FEI Strata 400</li></ul>                                                                                                                                                                                                                                                                                                                                                                                                                                                                                                                                                                                                                                                                                                                                                                                                                                                                                                                                                                                                                                                                                                                                                                                                                                                                                                                                     |  | Location:<br>Karlsruhe Institute of Technology (KIT)<br>Campus South, Building 30.22<br>Engesserstr. 7<br>D-76131 Karlsruhe<br>Germany                                                                                                                                                                     |  |
|                                                                                                                                                                                                                                                                                                                                                                                                                                                                                                                                                                                                                                                                                                                                                                                                                                                                                                                                                                                                                                                                                                                                                                                                                                                                                                                                                                                                                                                                                                                                                                                                                                                                                                      |  | <b>Contact Details of Technology Expert:</b><br><b>Name:</b> Prof. Dr. Dagmar Gerthsen<br><b>Phone:</b> +49 721 608-43200<br><b>Fax:</b> +49 721 608-43207<br><b>E-mail:</b> <a href="mailto:dagmar.gerthsen@kit.edu">dagmar.gerthsen@kit.edu</a>                                                          |  |
| <i>Short technology description/Overview:</i> <p>Different electron-microscopic techniques, including scanning electron microscopy (SEM), transmission electron microscopy (TEM) as well as scanning TEM (STEM), are applied to characterize the properties of nanoparticles and agglomerates thereof. Detailed information about the particle size and surface topography is obtained by field-emission SEM with a lateral resolution down to approximately 1 nm, whereas the crystal structure can be elucidated by electron diffraction in TEM and direct imaging at atomic resolution via high-resolution TEM (HRTEM). Both SEM and TEM investigations are combined with energy dispersive X-ray spectroscopy (EDXS) to reveal the chemical composition of the material in a quantitative manner, which can also be characterized along a line (line profiling) and two-dimensionally (X-ray mapping). An additional analytical tool for TEM inspection of particles at a high spatial resolution in the order of 1 nm is electron energy loss spectroscopy (EELS), which allows their quantitative element analysis, but also chemical-bond analyses by characterizing energy-loss near-edge structures (ELNES). Element distributions can be imaged through EELS line profiles and by energy-filtered TEM (EFTEM).</p> <p>A target preparation of nanoparticle assemblies is facilitated by combined focused ion beam (FIB) milling and SEM imaging, allowing for example a stepwise sectioning of single particles. These experiments can be supplemented by in-situ EDXS analyses and low-kV HAADF (high-angle annular dark-field) STEM imaging, yielding strong atomic-number contrast.</p> |  |                                                                                                                                                                                                                                                                                                            |  |
| <i>Main Features (Equipment Capabilities):</i>                                                                                                                                                                                                                                                                                                                                                                                                                                                                                                                                                                                                                                                                                                                                                                                                                                                                                                                                                                                                                                                                                                                                                                                                                                                                                                                                                                                                                                                                                                                                                                                                                                                       |  |                                                                                                                                                                                                                                                                                                            |  |
| TEM/STEM FEI TITAN 80-300 cubed <ul style="list-style-type: none"><li>• Operation modes and techniques (at 80 kV and 300 kV): TEM, Lorentz-mode TEM, aberration-corrected HRTEM, STEM, electron diffraction (SAED, CBED), EDXS, EELS/ EFTEM,</li></ul>                                                                                                                                                                                                                                                                                                                                                                                                                                                                                                                                                                                                                                                                                                                                                                                                                                                                                                                                                                                                                                                                                                                                                                                                                                                                                                                                                                                                                                               |  | FE-SEM ZEISS LEO 1530 and FE SEM FEI Quanta 650 ESEM <ul style="list-style-type: none"><li>• Accelerating voltages from 1 kV to 30 kV</li><li>• Secondary-electron (SE) imaging with optimum resolution of ~1 nm</li></ul>                                                                                 |  |
|                                                                                                                                                                                                                                                                                                                                                                                                                                                                                                                                                                                                                                                                                                                                                                                                                                                                                                                                                                                                                                                                                                                                                                                                                                                                                                                                                                                                                                                                                                                                                                                                                                                                                                      |  | Dual-beam FIB FEI Strata 400 <ul style="list-style-type: none"><li>• Materials milling with Ga+ ions in the energy range from 1 to 30 kV – minimum structure size of ~10 nm</li><li>• Preparation and lift-out of TEM lamellae</li><li>• In-lens SE imaging (about 1 nm resolution with electron</li></ul> |  |

|                                                                                                                                                                                                                                                                                                                                                                                                                                                                                                                                                                                                 |                                                                                                                                                                                                                                                                                          |                                                                                                                                                                                                                   |
|-------------------------------------------------------------------------------------------------------------------------------------------------------------------------------------------------------------------------------------------------------------------------------------------------------------------------------------------------------------------------------------------------------------------------------------------------------------------------------------------------------------------------------------------------------------------------------------------------|------------------------------------------------------------------------------------------------------------------------------------------------------------------------------------------------------------------------------------------------------------------------------------------|-------------------------------------------------------------------------------------------------------------------------------------------------------------------------------------------------------------------|
| electron tomography, electron holography                                                                                                                                                                                                                                                                                                                                                                                                                                                                                                                                                        | <ul style="list-style-type: none"><li>• Backscattered electron (BSE) imaging with optimum resolution of ~2.5 nm</li><li>• EDXS analysis (detection of elements with <math>Z \geq 5</math>)</li><li>• Low-vacuum operation up to 4000 Pa</li><li>• Liquid nitrogen cooled stage</li></ul> | excitation), < 1 nm resolution in HAADF STEM mode                                                                                                                                                                 |
| <ul style="list-style-type: none"><li>• 0.08 nm information limit in HRTEM imaging</li><li>• 0.14 nm STEM resolution</li><li>• 0.7 eV energy resolution (FWHM of zero-loss peak) at 300 kV,</li><li>• <math>\leq 0.2</math> eV with monochromator</li><li>• Analytical double-tilt holder, <math>\pm 80^\circ</math> tomography holder</li></ul>                                                                                                                                                                                                                                                |                                                                                                                                                                                                                                                                                          | <ul style="list-style-type: none"><li>• Material deposition (Pt, W) with ion or electron beam</li><li>• EDX spectrometer with silicon-drift detector (SDD), element detection for <math>Z \geq 5</math></li></ul> |
| <p>Limitations / constrains</p> <p>For investigations, powder material can be directly put on an electron-conducting support. For TEM/STEM characterization the particle size should be smaller than 200 nm. All samples have to be stable under high-vacuum conditions (except for SEM imaging with the FEI Quanta ESEM). Depending on the composition, the sample might be damaged by the electron beam (this holds especially organic material and polymers). EDXS allows detection of elements with atomic number <math>Z \geq 5</math> (EELS is able to detect <math>Z \geq 3</math>).</p> |                                                                                                                                                                                                                                                                                          |                                                                                                                                                                                                                   |
| <p>Typical structures &amp; designs</p>                                                                                                                                                                                                                                                                                                                                                                                                                                                                                                                                                         |                                                                                                                                                                                                                                                                                          |                                                                                                                                                                                                                   |
|  <p>SEM</p> <p>Secondary-electron image of a single Pt particle</p>                                                                                                                                                                                                                                                                                                                                                                                                                                           |  <p>TEM-BF</p> <p>TEM bright-field image of a mixture of <math>\text{Fe}_2\text{O}_3</math> nanoparticles in soot</p>                                                                                  |  <p>EFTEM C map</p> <p>Carbon map of a <math>\text{Fe}_2\text{O}_3</math> nanoparticles/ soot mixture obtained by EFTEM</p>   |
|  <p>HRTEM</p> <p>HRTEM image of an individual ZnO particle with about 10 nm size</p>                                                                                                                                                                                                                                                                                                                                                                                                                         |  <p>STEM</p> <p>Series of EEL spectra across two single <math>\text{Fe}_2\text{O}_3</math> particles embedded in soot</p>                                                                            |                                                                                                                                                                                                                   |
| <p>Any further Information:</p>                                                                                                                                                                                                                                                                                                                                                                                                                                                                                                                                                                 |                                                                                                                                                                                                                                                                                          |                                                                                                                                                                                                                   |

### S1-6b Representative Electron Microscopy (TEM)

|                                                                                                                                                                                                                                                                                                                                                                                                                                                                                                                                                                                                                                                                                                                                                                                                                                                                                                                                                                                                                                                                                                                                                                                                                                                                                                                                  |                                                                                                                                                                                                                                    |
|----------------------------------------------------------------------------------------------------------------------------------------------------------------------------------------------------------------------------------------------------------------------------------------------------------------------------------------------------------------------------------------------------------------------------------------------------------------------------------------------------------------------------------------------------------------------------------------------------------------------------------------------------------------------------------------------------------------------------------------------------------------------------------------------------------------------------------------------------------------------------------------------------------------------------------------------------------------------------------------------------------------------------------------------------------------------------------------------------------------------------------------------------------------------------------------------------------------------------------------------------------------------------------------------------------------------------------|------------------------------------------------------------------------------------------------------------------------------------------------------------------------------------------------------------------------------------|
| <p><b>Technology:</b><br/><i>Transmission Electron Microscopy (TEM)</i></p> <p><b>Equipment:</b><br/>Gatan SC600 CCD camera<br/>Oxford Instruments 80 mm<sup>2</sup> X-max SDD EDX detector running INCA software</p>                                                                                                                                                                                                                                                                                                                                                                                                                                                                                                                                                                                                                                                                                                                                                                                                                                                                                                                                                                                                                                                                                                            | <p><b>Category:</b><br/>C. Particle Characterisation in- and ex-situ</p> <p><b>Location:</b> Univleeds</p> <p><b>Contact Details of Technology Expert:</b><br/><b>Name:</b> Yunhong Jiang<br/><b>E-mail:</b> pedyj@leeds.ac.uk</p> |
| <p>FEI Tecnai F20 FEGTEM has been responsible for testing all batches of nanoparticles in this task. The equipment was operated at 200 kV fitted with Gatan SC600 CCD camera and Oxford Instruments 80 mm<sup>2</sup> X-max SDD EDX detector running INCA software. The microscope is operated in bright field mode with an extraction voltage of 3800 V and at spot size 3. The high resolution capabilities will obtain the information about atomic structure of the specimen. This TEM system is fully loaded including high angle annular dark field detector and X-ray energy disperse spectrometry. TEM samples of the NPs were prepared by nebulizing a thereof produced dispersion on a Cu grid (400 mesh) covered with a combined holey and ultrathin (about 3 nm) carbon film.</p> <p><i>TEM sample preparation:</i></p> <p>Sample preparation is very important for TEM observation and analysis. There are many ways available for preparing TEM sample. The facilities of TEM sample preparation has been focused on metallic materials, semiconductors, ceramics, and geo-science samples. The thickness of sample is between 10 and 200 nm depending on the material and the kind of observation. Samples are also to be electrically conductive, stable under vacuum and free of hydrocarbon contamination.</p> |                                                                                                                                                                                                                                    |
| <p><i>Any further Information:</i></p>                                                                                                                                                                                                                                                                                                                                                                                                                                                                                                                                                                                                                                                                                                                                                                                                                                                                                                                                                                                                                                                                                                                                                                                                                                                                                           |                                                                                                                                                                                                                                    |

## S1-7 Particle size distribution of the aerosol

|                                                                                                                                                                                                                                                                                                                                                                                                                                                                                                                                                                                                                                                                                                                                                                                                                                                                                                                                                                                                                                                                                                                                                                                                                                                                               |                                                                                                                                                                                                                                                                                                        |
|-------------------------------------------------------------------------------------------------------------------------------------------------------------------------------------------------------------------------------------------------------------------------------------------------------------------------------------------------------------------------------------------------------------------------------------------------------------------------------------------------------------------------------------------------------------------------------------------------------------------------------------------------------------------------------------------------------------------------------------------------------------------------------------------------------------------------------------------------------------------------------------------------------------------------------------------------------------------------------------------------------------------------------------------------------------------------------------------------------------------------------------------------------------------------------------------------------------------------------------------------------------------------------|--------------------------------------------------------------------------------------------------------------------------------------------------------------------------------------------------------------------------------------------------------------------------------------------------------|
| <p>Scanning Mobility Particle Sizer (SMPS)</p>                                                                                                                                                                                                                                                                                                                                                                                                                                                                                                                                                                                                                                                                                                                                                                                                                                                                                                                                                                                                                                                                                                                                                                                                                                | <p>Category: C. Particle Characterization in and ex-situ<br/>Institute: KIT<br/>Location: Institute for Technical Chemistry (ITC)<br/>Contact Details of Technology Expert:<br/>Name: M.Sc. Sonja Mülhopt<br/>Phone: ++49-721/608-2-3807<br/>Fax: ++49-721/608-2-4303<br/>E-mail: muelhopt@kit.edu</p> |
| <p><i>Short technology description/Overview:</i></p> <p>As inhalation is one of the main uptake routes of nanoparticles into human bodies the particle size distribution of aerosolized NP is of interest. In Quality-Nano it is determined by Scanning Mobility Particle Sizer (SMPS) after suspending them in clean air.</p> <p><b>Aerosolization</b></p> <p>Depending on the kind of particle collective the corresponding method of aerosolization was chosen: bulk material of higher amounts was dispersed by rotating brush generator (RBG1000, Palas GmbH, Karlsruhe, Germany) whereas liquid suspensions were sprayed with the electrospray aerosol generator 3840 (TSI Inc., MN, USA). Nanoparticle powders of low amounts were suspended in liquid and also sprayed with the electrospray aerosol generator 3840.</p> <p><b>Preparation of nanoparticle suspensions</b></p> <p>From test particles delivered as powder a stock solution in pure water was prepared and sonified in the bath (USR 57, Merck EuroLab). This stock solution was suspended in 1 ml electro conductive solution, mostly in 5 mMol HNO<sub>3</sub>.</p> <div data-bbox="368 1196 1209 1456">  </div> |                                                                                                                                                                                                                                                                                                        |
| <p><b>Figure 1:</b> <i>left:</i> view to the cone of the electrospray generator while aerosol generation; <i>right:</i> the electrospray aerosol generator 3840 (TSI Inc., MN, USA) coupled with the scanning mobility particle sizer SMPS (TSI Inc., MN, USA)</p>                                                                                                                                                                                                                                                                                                                                                                                                                                                                                                                                                                                                                                                                                                                                                                                                                                                                                                                                                                                                            |                                                                                                                                                                                                                                                                                                        |
| <p><b>Table 1:</b> relevant specifications of the Model 3480 Electrospray Aerosol Generator</p>                                                                                                                                                                                                                                                                                                                                                                                                                                                                                                                                                                                                                                                                                                                                                                                                                                                                                                                                                                                                                                                                                                                                                                               |                                                                                                                                                                                                                                                                                                        |
| Mode of operation                                                                                                                                                                                                                                                                                                                                                                                                                                                                                                                                                                                                                                                                                                                                                                                                                                                                                                                                                                                                                                                                                                                                                                                                                                                             | Generation of aerosols from liquid solutions or suspensions using an electrospray method                                                                                                                                                                                                               |
| Capillary dimension                                                                                                                                                                                                                                                                                                                                                                                                                                                                                                                                                                                                                                                                                                                                                                                                                                                                                                                                                                                                                                                                                                                                                                                                                                                           | 25 µm, 250 mm length                                                                                                                                                                                                                                                                                   |
| Particle type                                                                                                                                                                                                                                                                                                                                                                                                                                                                                                                                                                                                                                                                                                                                                                                                                                                                                                                                                                                                                                                                                                                                                                                                                                                                 | Solids or nonvolatile liquids soluble in 20 mM ammonium acetate solution in ultrapure water or 0.05% trifluoroacetic acid in ultrapure water. Suspensions in some solvents up to a particle size of 100 nm.                                                                                            |
| Initial droplet diameter                                                                                                                                                                                                                                                                                                                                                                                                                                                                                                                                                                                                                                                                                                                                                                                                                                                                                                                                                                                                                                                                                                                                                                                                                                                      | 150 nm nominal                                                                                                                                                                                                                                                                                         |
| Particle generation rate                                                                                                                                                                                                                                                                                                                                                                                                                                                                                                                                                                                                                                                                                                                                                                                                                                                                                                                                                                                                                                                                                                                                                                                                                                                      | >10 <sup>7</sup> particles/cm <sup>3</sup>                                                                                                                                                                                                                                                             |
| Particle size range                                                                                                                                                                                                                                                                                                                                                                                                                                                                                                                                                                                                                                                                                                                                                                                                                                                                                                                                                                                                                                                                                                                                                                                                                                                           | 2 to 100 nm                                                                                                                                                                                                                                                                                            |
| Liquid conductivity                                                                                                                                                                                                                                                                                                                                                                                                                                                                                                                                                                                                                                                                                                                                                                                                                                                                                                                                                                                                                                                                                                                                                                                                                                                           | 0.2 S/m nominal                                                                                                                                                                                                                                                                                        |

## Measuring the number size distribution

Number size distributions were measured using a scanning mobility particle sizer (SMPS, DMA 3071 with CPC 3775, TSI). Aerosols typically show a log-normal distribution of size. The number size distribution was measured at least three times. The data were corrected regarding sampling losses using the penetration factor for tubing according to Soderholm [34] and analyzed by determining the mean  $\pm$  standard deviation of the three number measurements in each size channel. The resulting particle number size distribution  $dN/d\log(d_p)$  [ $1/\text{cm}^3$ ] can be characterized by the three parameters of the log-normal fits: the modal value  $x_m$  [nm], the geometric standard deviation  $\sigma_{\text{geo}}$  [-/-] and the total number concentration  $c_N$  [ $1/\text{cm}^3$ ]. These three parameters are reported in the data sheets.

### *Typical Samples & Images:*



### *Any further Information:*

## S1-8a Particle size distribution (DLS)

|                                                                                                                                                                                                                                                                                                                                                                                                                                                                                                                                                                                                                                                                                                                                                                                                                                                                                                                                                                                                                                                                                                                                                                                                                                                                                                                                                                                                                                                                                                                                                                                                                                                                                                                                                                                                                                                                                                                                                                                                                                                                                                                                                                                                                                                                                                                                                                                                                                                                                                                                                                                                                                                                                                                                                                                                                                                                                                                                                                                                                                                                                                                                                                                                                                                                                                                                                                                                                                                                                                                                                                                                                                                                                                                   |                                                                                                                                                |
|-------------------------------------------------------------------------------------------------------------------------------------------------------------------------------------------------------------------------------------------------------------------------------------------------------------------------------------------------------------------------------------------------------------------------------------------------------------------------------------------------------------------------------------------------------------------------------------------------------------------------------------------------------------------------------------------------------------------------------------------------------------------------------------------------------------------------------------------------------------------------------------------------------------------------------------------------------------------------------------------------------------------------------------------------------------------------------------------------------------------------------------------------------------------------------------------------------------------------------------------------------------------------------------------------------------------------------------------------------------------------------------------------------------------------------------------------------------------------------------------------------------------------------------------------------------------------------------------------------------------------------------------------------------------------------------------------------------------------------------------------------------------------------------------------------------------------------------------------------------------------------------------------------------------------------------------------------------------------------------------------------------------------------------------------------------------------------------------------------------------------------------------------------------------------------------------------------------------------------------------------------------------------------------------------------------------------------------------------------------------------------------------------------------------------------------------------------------------------------------------------------------------------------------------------------------------------------------------------------------------------------------------------------------------------------------------------------------------------------------------------------------------------------------------------------------------------------------------------------------------------------------------------------------------------------------------------------------------------------------------------------------------------------------------------------------------------------------------------------------------------------------------------------------------------------------------------------------------------------------------------------------------------------------------------------------------------------------------------------------------------------------------------------------------------------------------------------------------------------------------------------------------------------------------------------------------------------------------------------------------------------------------------------------------------------------------------------------------|------------------------------------------------------------------------------------------------------------------------------------------------|
| <p><i>Equipment Name:</i></p> <p><i>Malvern Zetasizer Nano ZS</i></p>                                                                                                                                                                                                                                                                                                                                                                                                                                                                                                                                                                                                                                                                                                                                                                                                                                                                                                                                                                                                                                                                                                                                                                                                                                                                                                                                                                                                                                                                                                                                                                                                                                                                                                                                                                                                                                                                                                                                                                                                                                                                                                                                                                                                                                                                                                                                                                                                                                                                                                                                                                                                                                                                                                                                                                                                                                                                                                                                                                                                                                                                                                                                                                                                                                                                                                                                                                                                                                                                                                                                                                                                                                             | <p>Category: C. Particle Characterization<br/>Institute: Campus UCD<br/>Contact Details of Technology Expert:<br/>eugene.mahon@cbni.ucd.ie</p> |
| <p><i>Overview</i></p> <p>Dynamic Light Scattering which can measure suspended particle hydrodynamic radius across a large range.</p> <p><b>Sample Protocol: Stöber Silica Aqueous Suspension DLS Size Measurement Protocol</b><br/>( modified from protocol developed by Dr. Sonia Ramirez)</p> <ol style="list-style-type: none"> <li>1. Wear appropriate personal protective gear and take appropriate precautions when handling nanomaterials.</li> <li>2. Power up instrument at least 30 min in advance of measurements.</li> <li>3. Suspend particle sample to the required concentration in MilliQ water.</li> <li>4. Take the required volume of particle solution to fill the DLS cuvette to the recommended mark. Quartz or optical-quality glass cuvettes are generally preferred, but good quality plastic cuvettes may be substituted. All cuvettes, but in particular the more scratch-prone plastic cuvettes, should be routinely inspected prior to use and discarded if surface scratches or defects are visible.</li> <li>5. Pre-rinse clean cuvette with filtered deionised water at least 3 times prior to loading sample. This is best done in a clean bench if available. Disposable plastic cuvettes should also be rinsed to eliminate any dust that might have deposited on them.</li> <li>6. Recommendations for loading cuvette prior to analysis:             <ol style="list-style-type: none"> <li>6.1. Load sample into cuvette using minimum volume necessary to ensure liquid level is at least 2 mm above the entrance height of the laser beam for your particular instrument configuration (or refer to the instrument manual for recommended filling height for your cell and instrument configuration). <b><i>Do not overfill cuvettes past the recommended level, as overfilling can lead to thermal gradients that will adversely impact measurement accuracy.</i></b> For microcuvettes with a sample well insert, fill the well with sample, but do not fill beyond the well lip.</li> <li>6.2. Take care not to touch the cuvette windows with your bare hands while loading. Wipe the outside of glass or quartz cuvettes with lens paper to ensure cleanliness. If using disposable plastic cuvettes, do not wipe outside surface as this may leave scratches that will interfere with measurements.</li> <li>6.3. Cap the cuvette to prevent dust contamination and evaporation of solution.</li> <li>6.4. Inspect the cuvette to insure that air bubbles are not attached to the optical window area. If necessary, <b><i>gently</i></b> tap cuvette on a non-metallic padded surface to release bubbles before placing the cuvette in the sample holder, or, if necessary, repeat the loading procedure with fresh sample. <b><i>Never shake cuvette, as this may introduce air bubbles or entrap air in the sample well of some microcuvettes.</i></b></li> <li>6.5. Place the cuvette correctly in the sample holder; i.e. optical windows should be facing the incident beam and detector.</li> </ol> </li> <li>7. The recommended measurement temperature (temperature of the test material) is near to or slightly above laboratory temperature. Measurements should not be conducted outside the range (20 to 25.5) °C. Recommended refractive index and viscosity values for the suspending medium (H<sub>2</sub>O) used in the calculation of z-average size from DLS measurements are given in table 1. If your instrument permits accurate temperature control, perform the size measurement at 25°C.</li> </ol> <p><b>Refractive Index:</b> 1.332 (suitable for wavelengths in the 488-750 nm range within the temperature range of 20 to 25.5°C)</p> |                                                                                                                                                |

*If your instrument does not allow or require user input of viscosity and refractive index values, use the default settings for pure water at the measurement temperature, and report these values with your data.*

**Table 1. Viscosity values used in the calculation of z-average size from DLS when water is used as suspending medium**

| Temperature T<br>[°C] | Absolute Viscosity<br>[mPa·s] | Temperature T<br>[°C] | Absolute Viscosity<br>[mPa·s] |
|-----------------------|-------------------------------|-----------------------|-------------------------------|
| 20                    | 1.002                         | 20.5                  | 0.989                         |
| 21                    | 0.977                         | 21.5                  | 0.966                         |
| 22                    | 0.954                         | 22.5                  | 0.943                         |
| 23                    | 0.932                         | 23.5                  | 0.921                         |
| 24                    | 0.910                         | 24.5                  | 0.900                         |
| 25                    | 0.890                         | 25.5                  | 0.880                         |

Other values can be interpolated using the above data.

8. Allow 4 min equilibration time at the measurement temperature (25°C if possible) if the volume of sample used is 1mL or less. Larger sample volumes may require longer equilibration times. The temperature should be controlled and measured with a precision of 0.1 °C. Accuracy of the temperature measurement device should be better than 0.5 °C.
9. Take 3 different aliquots from the diluted sample (as per point 3) and make 3 independent measurements or repeats. This should be done for each received material. This will allow us to establish measurement repeatability. Measurement duration should be set according to instrument manufacturer's recommendations.<sup>4</sup>
10. If scattering intensity exceeds the optimum count rate for your instrument as stipulated by the manufacturer, the test materials can be diluted. To perform the dilutions use deionised water (18m resistance) filtered to at least 0.2 µm or smaller.
11. If contamination or dust particles appear to be present in the test material (e.g., based upon high data variability or the occurrence of large size modes)
  - 11.1. Change the cuvette and use fresh sample. Repeat steps 6-10
  - 11.2. If the problem is not solved, the test materials can be filtered prior to analysis using a syringe filter in the range 0.2 – 0.45 µm pore size.

*Main Features (Equipment Capabilities):*

- Size measurement from 1nm (diameter) to 10 microns using patented *NIBS* (Non-Invasive Back Scatter) technology
- Zeta potential of proteins and particles from 3.8 nm up to 100 microns (diameter) using patented *M3-PALS* technology
- Sample concentrations from 0.1ppm to 40%w/v

*Typical Samples & Images:*

DLS distribution (bottom left ) of fluorescent Stöber silica with for comparison TEM and DCS (Differential Centrifugal Sedimentation) results.



*Any further Information:*

## S1-8b Particle size distribution (DLS)

|                                                                                                                                                                                                                                                                                                                                                                                                                                                                                                                                                                                                                                                                                                                                                                                                                                                                                                                                                                                                                                                                                                                                                                                                                                                                                                                                                                                                                                                                                                                                                                                                                                                                                                                                                                                                                                                                                                                                                                                                                                                                                                                                                                                                                                                                                                                                                                                                                                                                                                                        |                                                                                                                                                                                                       |
|------------------------------------------------------------------------------------------------------------------------------------------------------------------------------------------------------------------------------------------------------------------------------------------------------------------------------------------------------------------------------------------------------------------------------------------------------------------------------------------------------------------------------------------------------------------------------------------------------------------------------------------------------------------------------------------------------------------------------------------------------------------------------------------------------------------------------------------------------------------------------------------------------------------------------------------------------------------------------------------------------------------------------------------------------------------------------------------------------------------------------------------------------------------------------------------------------------------------------------------------------------------------------------------------------------------------------------------------------------------------------------------------------------------------------------------------------------------------------------------------------------------------------------------------------------------------------------------------------------------------------------------------------------------------------------------------------------------------------------------------------------------------------------------------------------------------------------------------------------------------------------------------------------------------------------------------------------------------------------------------------------------------------------------------------------------------------------------------------------------------------------------------------------------------------------------------------------------------------------------------------------------------------------------------------------------------------------------------------------------------------------------------------------------------------------------------------------------------------------------------------------------------|-------------------------------------------------------------------------------------------------------------------------------------------------------------------------------------------------------|
| <b>Technology:</b><br><i>Dynamic Light Scattering (DLS)</i>                                                                                                                                                                                                                                                                                                                                                                                                                                                                                                                                                                                                                                                                                                                                                                                                                                                                                                                                                                                                                                                                                                                                                                                                                                                                                                                                                                                                                                                                                                                                                                                                                                                                                                                                                                                                                                                                                                                                                                                                                                                                                                                                                                                                                                                                                                                                                                                                                                                            | <b>Category:</b><br>C. Particle Characterisation in- and ex-situ<br><b>Location:</b><br>Univleeds<br><b>Contact Details of Technology Expert:</b><br>Name: Yunhong Jiang<br>E-mail: pedyj@leeds.ac.uk |
| <p><i>Short technology description / Overview:</i></p> <p>Dynamic Light Scattering (DLS) is an important tool for characterizing the size of nanoparticles in solution. DLS measures the light scattered from a laser that passes through a colloidal solution and by analyzing the modulation of the scattered light intensity as a function of time, the hydrodynamic size of particles and particle agglomerates can be determined. DLS is a valuable tool for determining and measuring the agglomeration state of nanoparticles as a function of time or suspending solution. When DLS sizing data is compared to Transmission Electron Microscopy images, the aggregation state of the particles can be determined. In an unagglomerated suspension, the DLS measured diameter will be similar or slightly larger than the TEM size. If the particles are agglomerated, the DLS measurement is often much larger than the TEM size and can have a high polydispersity index (large variability in the particle size).</p> <p>The Malvern Zetasizer series combines a particle size analyzer, zeta potential analyzer and molecular weight analyzer for particles and molecules from below a nanometer in size to several microns. The systems measure size using dynamic light scattering. Zeta potential and electrophoretic mobility use electrophoretic light scattering, and molecular weight use static light scattering. For particles in situ in biofluids (e.g. cell culture media), additional care is needed in performing the experiments and in interpreting the data, especially given the known relationship between size and scattering (i.e. a few large agglomerates can mask the presence of a large number of small particles).</p> <p><i>DLS sample preparation:</i></p> <p>A concentration should be chosen such that the result is independent of the concentration chosen. The maximum concentration should be less than 1% by volume to avoid particle interaction. The minimum concentration should generate a minimum count rate of 10,000 counts per second (10kcps) for water as the dispersant. The recommended concentration is in the range of 0.1% (for particles as small as a few nm) to 0.0001% (for particles as large as 1 µm) by volume. Ultrasonication was used to remove air bubbles or to breakup agglomerates. Keep in mind that in some cases the primary particles may be damaged. The size range is from 1 nm up to 6 µm, based on 1 g/cm<sup>3</sup> density.</p> |                                                                                                                                                                                                       |
| <p><i>Any further Information:</i></p>                                                                                                                                                                                                                                                                                                                                                                                                                                                                                                                                                                                                                                                                                                                                                                                                                                                                                                                                                                                                                                                                                                                                                                                                                                                                                                                                                                                                                                                                                                                                                                                                                                                                                                                                                                                                                                                                                                                                                                                                                                                                                                                                                                                                                                                                                                                                                                                                                                                                                 |                                                                                                                                                                                                       |

## S1-9 Gas sorption analysis

|                                                                                                                                                                                                                                                                                                                                                                                                                                                                                                                                                                                                                                                                                                                                                                                                                                                                                                                                                                                                                                                                                                                                                                                                                                                                                                                                                                                                                                                                                                                                                                                                                                                                                                                                                                                                              |                                                                                                                                                                                                                                                             |
|--------------------------------------------------------------------------------------------------------------------------------------------------------------------------------------------------------------------------------------------------------------------------------------------------------------------------------------------------------------------------------------------------------------------------------------------------------------------------------------------------------------------------------------------------------------------------------------------------------------------------------------------------------------------------------------------------------------------------------------------------------------------------------------------------------------------------------------------------------------------------------------------------------------------------------------------------------------------------------------------------------------------------------------------------------------------------------------------------------------------------------------------------------------------------------------------------------------------------------------------------------------------------------------------------------------------------------------------------------------------------------------------------------------------------------------------------------------------------------------------------------------------------------------------------------------------------------------------------------------------------------------------------------------------------------------------------------------------------------------------------------------------------------------------------------------|-------------------------------------------------------------------------------------------------------------------------------------------------------------------------------------------------------------------------------------------------------------|
| <p><i>Gas sorption analysis</i></p>                                                                                                                                                                                                                                                                                                                                                                                                                                                                                                                                                                                                                                                                                                                                                                                                                                                                                                                                                                                                                                                                                                                                                                                                                                                                                                                                                                                                                                                                                                                                                                                                                                                                                                                                                                          | <p>Category:<br/>C. Particle Characterisation in and ex-situ<br/>Institute: UU<br/>Location: Ångström lab<br/>Contact Details of Technology Expert:<br/>Johan Forsgren <a href="mailto:johan.forsgren@angstrom.uu.se">johan.forsgren@angstrom.uu.se</a></p> |
| <p><i>Short technology description / Overview</i></p> <p>Gas sorption analysis enables measurement of specific surface area, pore volume and pore size distribution of dry particles. The technique is based on the gradual multilayer formation of physisorbed gas molecules on solid surfaces at different pressures. An isotherm is obtained by measuring the amount of adsorbed gas molecules on the sample at different pressures, and the data is used for calculations of specific surface area, pore volume and pore size distribution. The adsorption branch in the isotherm is used to determine the specific surface area according to the BET-equation and information about the pores in the powder can for instance be obtained by applying the BJH-equation to the desorption branch. The BJH-equation is a modified version of the Kelvin equation describing desorption of molecules from condensed gas contained in small pores. Another way to determine the porous properties of a powder is to use density functional theory (DFT) on the isotherm, which is a more modern and accurate method. The nature of the technique only allows for analysis of pores in the meso to micro size range as the limited size of these pores makes the gas condense inside the pores below the saturation pressure (capillary condensation), and it is this phenomenon that enables analysis of the pores in the sample.</p> <p>For accurate measurement, the sample needs to be degassed properly in order to remove all water from the surface prior to analysis, preferably over 110°C. Between 0.1g and 0.5g of sample is generally a good quantity for analysis.</p> <p>The analysis is carried out using an ASAP 2020 (Micromeritics) at 77K (-196°C) with N<sub>2</sub> as analysis gas.</p> |                                                                                                                                                                                                                                                             |
| <p><i>Main Features (Equipment Capabilities):</i></p> <ul style="list-style-type: none"> <li>• Specific surface area</li> <li>• Pore volume</li> <li>• Pore size distribution</li> </ul>                                                                                                                                                                                                                                                                                                                                                                                                                                                                                                                                                                                                                                                                                                                                                                                                                                                                                                                                                                                                                                                                                                                                                                                                                                                                                                                                                                                                                                                                                                                                                                                                                     |                                                                                                                                                                                                                                                             |
| <p><i>Typical Samples &amp; Images:</i></p>                                                                                                                                                                                                                                                                                                                                                                                                                                                                                                                                                                                                                                                                                                                                                                                                                                                                                                                                                                                                                                                                                                                                                                                                                                                                                                                                                                                                                                                                                                                                                                                                                                                                              |                                                                                                                                                                                                                                                             |
| <p><i>Any further Information:</i></p>                                                                                                                                                                                                                                                                                                                                                                                                                                                                                                                                                                                                                                                                                                                                                                                                                                                                                                                                                                                                                                                                                                                                                                                                                                                                                                                                                                                                                                                                                                                                                                                                                                                                                                                                                                       |                                                                                                                                                                                                                                                             |

## S1--10 Zeta potential (surface charge)

|                                                                                                                                                                                                                                                                                                                                                                                                                                                                                                                                                                                                                                                                                                                                                                                                                                                                                                                                                                                                                                                                                                                                                                                                                                                                                                                                                                                                                                                                                                                                                                                                                                                                                                                                                                                                                                                                                                                                                                                                                                                          |                                                                                                                                                                                                                                                          |
|----------------------------------------------------------------------------------------------------------------------------------------------------------------------------------------------------------------------------------------------------------------------------------------------------------------------------------------------------------------------------------------------------------------------------------------------------------------------------------------------------------------------------------------------------------------------------------------------------------------------------------------------------------------------------------------------------------------------------------------------------------------------------------------------------------------------------------------------------------------------------------------------------------------------------------------------------------------------------------------------------------------------------------------------------------------------------------------------------------------------------------------------------------------------------------------------------------------------------------------------------------------------------------------------------------------------------------------------------------------------------------------------------------------------------------------------------------------------------------------------------------------------------------------------------------------------------------------------------------------------------------------------------------------------------------------------------------------------------------------------------------------------------------------------------------------------------------------------------------------------------------------------------------------------------------------------------------------------------------------------------------------------------------------------------------|----------------------------------------------------------------------------------------------------------------------------------------------------------------------------------------------------------------------------------------------------------|
| <p><i>Zeta potential</i></p>                                                                                                                                                                                                                                                                                                                                                                                                                                                                                                                                                                                                                                                                                                                                                                                                                                                                                                                                                                                                                                                                                                                                                                                                                                                                                                                                                                                                                                                                                                                                                                                                                                                                                                                                                                                                                                                                                                                                                                                                                             | <p>Category:<br/>C. Particle Characterisation in and ex-situ<br/>Institute: UU, Location: Ångström lab<br/>Contact Details of Technology Expert:<br/>Johan Forsgren <a href="mailto:johan.forsgren@angstrom.uu.se">johan.forsgren@angstrom.uu.se</a></p> |
| <p><i>Short technology description / Overview</i></p> <p>The zeta potential describes the electrical potential at the slipping plane in the electrical double layer of dispersed particles, i.e. the potential between the dispersion medium and the stationary layer of fluid surrounding the particles. The magnitude of the zeta potential relates to the surface charge of the particles and the pH of the dispersion medium. The ions in the dispersion medium (and hence the pH) affect the nature of the electrical double layer around the particles where a positive charge is built up under acidic conditions and vice versa. Therefore is pointless to measure the zeta potential without knowing the pH of the suspension. The pH value where the zeta potential is zero is called the isoelectric point (IEP) and is the point where the stability of the colloidal suspension is lowest. A colloidal suspension is generally considered stabile at zeta potentials greater than <math>\pm 30\text{mV}</math>. At low zeta potential, the electrostatic repulsion between the particles in suspension is low and the particles tend to flocculate.</p> <p>The zeta potential does not only serve as a measure of the stability of the colloidal suspension of particles, but can also be used as an indicator of the surface charge of the particles as there is no direct way to measure this property. The zeta potential is measured using electrophoresis where particles in suspension are subjected to an electric field and the velocity of the moving particles is measured using light scattering techniques. From the velocity of the particles, the zeta potential can be obtained using the Henry equation.</p> <p>The zeta potential is preferably measured in aqueous electrolytes containing <math>10^{-2}</math>-<math>10^{-3}</math> M salt. For example, the particles can be suspended in an <math>10^{-3}</math> M KCl electrolyte where the pH is adjusted with <math>10^{-2}</math> M solutions of HCl and NaOH.</p> |                                                                                                                                                                                                                                                          |
| <p><i>Main Features (Equipment Capabilities):</i></p> <ul style="list-style-type: none"> <li>• Measurement of zeta potential of particles in suspension at different pH</li> <li>• Assessment of colloidal suspension stability</li> <li>• Determination of isoelectric point of particles</li> </ul>                                                                                                                                                                                                                                                                                                                                                                                                                                                                                                                                                                                                                                                                                                                                                                                                                                                                                                                                                                                                                                                                                                                                                                                                                                                                                                                                                                                                                                                                                                                                                                                                                                                                                                                                                    |                                                                                                                                                                                                                                                          |
| <p><i>Typical Samples &amp; Images:</i></p>                                                                                                                                                                                                                                                                                                                                                                                                                                                                                                                                                                                                                                                                                                                                                                                                                                                                                                                                                                                                                                                                                                                                                                                                                                                                                                                                                                                                                                                                                                                                                                                                                                                                                                                                                                                                                                                                                                                           |                                                                                                                                                                                                                                                          |
| <p><i>Any further Information:</i></p>                                                                                                                                                                                                                                                                                                                                                                                                                                                                                                                                                                                                                                                                                                                                                                                                                                                                                                                                                                                                                                                                                                                                                                                                                                                                                                                                                                                                                                                                                                                                                                                                                                                                                                                                                                                                                                                                                                                                                                                                                   |                                                                                                                                                                                                                                                          |

## S1-11 Photocatalytic activity

|                                                                                                                                                                                                                                                                                                                                                                                                                                                                                                                                                                                                                                                                                                                                                                                                                                                                                                                                                                                                                                                                                                                                                                                                                                                                                                                                                                                                                                                                                                                                                                                                                                                                                                                                                                                                                                                                                                                                                                                                                                                                                                                                                                                                                                                                                                                                                                                                                                                                                    |                                                                                                                                                                                                                                               |
|------------------------------------------------------------------------------------------------------------------------------------------------------------------------------------------------------------------------------------------------------------------------------------------------------------------------------------------------------------------------------------------------------------------------------------------------------------------------------------------------------------------------------------------------------------------------------------------------------------------------------------------------------------------------------------------------------------------------------------------------------------------------------------------------------------------------------------------------------------------------------------------------------------------------------------------------------------------------------------------------------------------------------------------------------------------------------------------------------------------------------------------------------------------------------------------------------------------------------------------------------------------------------------------------------------------------------------------------------------------------------------------------------------------------------------------------------------------------------------------------------------------------------------------------------------------------------------------------------------------------------------------------------------------------------------------------------------------------------------------------------------------------------------------------------------------------------------------------------------------------------------------------------------------------------------------------------------------------------------------------------------------------------------------------------------------------------------------------------------------------------------------------------------------------------------------------------------------------------------------------------------------------------------------------------------------------------------------------------------------------------------------------------------------------------------------------------------------------------------|-----------------------------------------------------------------------------------------------------------------------------------------------------------------------------------------------------------------------------------------------|
| <i>Equipment Name:</i><br><i>Photocatalytic Activity test</i>                                                                                                                                                                                                                                                                                                                                                                                                                                                                                                                                                                                                                                                                                                                                                                                                                                                                                                                                                                                                                                                                                                                                                                                                                                                                                                                                                                                                                                                                                                                                                                                                                                                                                                                                                                                                                                                                                                                                                                                                                                                                                                                                                                                                                                                                                                                                                                                                                      | Category:<br>C. Particle Characterisation in and ex-situ<br>Institute: Institut Català de Nanotecnologia (ICN)<br>Location: Campus UAB<br>Contact Details of Technology Expert:<br>Jordi Piella<br>Tel. +34-937374624<br>Jordi.piella@icn.cat |
| <i>Short technology description/Overview</i> <p>The principle of the photo catalysis by nanoparticles is straightforward. Under a radiation source, and upon adsorption of photons with energy higher than the band gap, electrons are excited from the valence band to the conduction band, creating electron-hole pairs. These charge carriers, in particular the electrons from the conduction band, migrate to the surface of the particle -where the reactions take place- and facilitate reduction reactions. The capture of holes and electrons by adsorbed species generate a variety of highly reactive radicals and intermediate species such as OH<sup>•</sup>, O<sub>2</sub><sup>•-</sup>, H<sub>2</sub>O<sub>2</sub> capable of producing the oxidation of organic matter. In an aqueous media, the kinetic of the photocatalytic reactions mediated by nanoparticles can be followed spectrophotometrically by studying the degradation of organic dyes such as Rhodamine B (RhB), Methylene Blue or some phenol derivatives during photo-oxidation. Thus, by testing the photocatalytic degradation of RhB as a model contaminant it is possible to have an approximation of the potential environmental applications for the removal of contaminants from wastewater.</p> <i>Material</i> <p>Rhodamine B (RhB)</p> <i>Procedure</i> <p>Photocatalytic activity test is performed in Milli-Q<sup>®</sup> water at ambient temperature (25°C) and circumneutral pH as a function of the decolorization of RhB with time.</p> <p>An aqueous solution of tested particles is stirred with RhB dye (1 mM). If the sample is in powder form, the solution is previously sonicated for 15 minutes to properly disperse the particles before RhB addition. The solution is kept in dark conditions and allowed to reach the absorption-desorption equilibrium among the photocatalyst for 30 min. UV Lamp (100 W, 365 nm, Ted Pella, Inc.) is used as a light source to trigger the photocatalytic reaction. The average light intensity striking on the surface of the reaction solution is around 8.9 mW/cm<sup>2</sup>. After UV irradiation for some time, 1 mL of the sample is taken and the absorbance of RhB remaining in the supernatant is measured using a UV-Visible spectrophotometer (Shimadzu UV-2401). In the case that the particles absorb in the same range as RhB, centrifugation of the solution at high speed is done prior to the measurements.</p> |                                                                                                                                                                                                                                               |
| <i>Main Features (Equipment capabilities):</i> <p>UV-Vis spectrophotometer (Shimadzu UV-2401) for absorbance measurement from 300 nm to 800 nm.</p>                                                                                                                                                                                                                                                                                                                                                                                                                                                                                                                                                                                                                                                                                                                                                                                                                                                                                                                                                                                                                                                                                                                                                                                                                                                                                                                                                                                                                                                                                                                                                                                                                                                                                                                                                                                                                                                                                                                                                                                                                                                                                                                                                                                                                                                                                                                                |                                                                                                                                                                                                                                               |

*Typical Samples & Images:*



Figure 1: Photocatalytic degradation of rhodamine B in the presence of commercial Degussa P25 nanoparticles (Sigma-Aldrich) under UV light irradiation (left) Temporal Evolution of UV-Vis spectrum of RhB, (right) Photocatalytic performance of RhB.

Kinetic of the reaction

$$\frac{A}{A_0} = \exp(-kt)$$

A = absorbance

K = kinetic constant

t = time

*Any further Information:*

Beydoun, D.; Amal, R.; Low, G.; McEvoy, S. Role of nanoparticles in photocatalysis. Journal of Nanoparticle Research 1999, 1, 439-458.

## S1--12 Octanol-Water partition coefficient $P_{ow}$

|                                                                                                                                                                                                                                                                                                                                                                                                                                                                                                                                                                                                                                                                                                                                                                                                                                                                                                                                                                                                                                                                                                                                                                                                                                                                                                                                                                                                                                                                                                                                                                                                                                                                                                                                                                                                                                                                                                                                                                                                                                                                                                                                                                                                                                                                                                                                                                                                                                                                                                 |                                                                                                                                                                                                                                                                                                                  |
|-------------------------------------------------------------------------------------------------------------------------------------------------------------------------------------------------------------------------------------------------------------------------------------------------------------------------------------------------------------------------------------------------------------------------------------------------------------------------------------------------------------------------------------------------------------------------------------------------------------------------------------------------------------------------------------------------------------------------------------------------------------------------------------------------------------------------------------------------------------------------------------------------------------------------------------------------------------------------------------------------------------------------------------------------------------------------------------------------------------------------------------------------------------------------------------------------------------------------------------------------------------------------------------------------------------------------------------------------------------------------------------------------------------------------------------------------------------------------------------------------------------------------------------------------------------------------------------------------------------------------------------------------------------------------------------------------------------------------------------------------------------------------------------------------------------------------------------------------------------------------------------------------------------------------------------------------------------------------------------------------------------------------------------------------------------------------------------------------------------------------------------------------------------------------------------------------------------------------------------------------------------------------------------------------------------------------------------------------------------------------------------------------------------------------------------------------------------------------------------------------|------------------------------------------------------------------------------------------------------------------------------------------------------------------------------------------------------------------------------------------------------------------------------------------------------------------|
| <i>Equipment Name:</i><br><br><i>Octanol-Water partition coefficient</i>                                                                                                                                                                                                                                                                                                                                                                                                                                                                                                                                                                                                                                                                                                                                                                                                                                                                                                                                                                                                                                                                                                                                                                                                                                                                                                                                                                                                                                                                                                                                                                                                                                                                                                                                                                                                                                                                                                                                                                                                                                                                                                                                                                                                                                                                                                                                                                                                                        | <b>Category:</b><br>C. Particle Characterisation in and ex-situ<br><b>Institute:</b> Institut Català de Nanotecnologia (ICN)<br><b>Location:</b> Campus UAB<br><b>Contact Details of Technology Expert:</b><br>Jordi Piella<br>Tel. +34-937374624 <a href="mailto:Jordi.piella@icn.cat">Jordi.piella@icn.cat</a> |
| <i>Short technology description</i><br><br>The partition coefficient (P) is defined as the ratio of the equilibrium concentrations of a dissolved substance in a two-phase system consisting of two largely immiscible solvents. In the case of n-octanol and water:<br>$P_{ow} = \frac{C_{n-octanol}}{C_{water}}$<br>The partition coefficient, being the quotient of two concentrations or the quotient of the fractions of the test substance in the two phases multiplied by a fixed volume ratio, is dimensionless and is usually given in the form of its logarithm to base ten.<br>Octanol-water partition coefficient can be measured in two different ways: regarding the concentration of ions from the nanoparticles or in terms of the number of nanoparticles in each phase. The last one is the one presented here. However, in this case the results become highly dependent on the type of coating on the surface of the particles and thus it partially loses its sense. Moreover, particles synthesized in aqueous solution are obvious to be more affine to water than octanol.<br><br><i>Material</i><br><br>1-Octanol (99%) was purchased from Sigma-Aldrich. Milli-Q® water is used in all the experiments. Water taken directly from an ion exchange should not be used.<br><br><i>Procedure</i><br><br>Before a partition coefficient is determined, the two solvents are mutually saturated at the temperature of the experiment. To do this, it is practical to shake two large stock bottles, one containing n-octanol and a sufficient quantity of water, and the other containing water and a sufficient quantity of n-octanol, for 24 hours on a mechanical shaker, and then to let them stand long enough to allow the phases to separate.<br>Equal volume of dispersed nanoparticles in water and n-octanol are mixed for 12 hours at 25°C. Then the two phases are allowed to separate for 2 hours and the concentration of nanoparticles in the n-octanol phase are analysed by Inductively Coupled Plasma Mass Spectrometry (ICP-MS) Agilent instrument (Model: 7500cx) with a detection limit of 0.02386 ppb . In case that the nanoparticles are in powder form, the sample is sonicated (Brandson 2510) for 15 min for better dispersion. Since ICP-MS cannot be used for polystyrene nanoparticles, the presence of these particles in the octanol phase is measured by comparing the absorbance of the n-octanol phase before and after the experiment. |                                                                                                                                                                                                                                                                                                                  |
| <i>Main Features (Equipment capabilities):</i><br><br>Inductively Coupled Plasma Mass Spectrometry (ICP-MS) Agilent instrument (Model: 7500cx) with a detection limit of 0.02386 ppb.                                                                                                                                                                                                                                                                                                                                                                                                                                                                                                                                                                                                                                                                                                                                                                                                                                                                                                                                                                                                                                                                                                                                                                                                                                                                                                                                                                                                                                                                                                                                                                                                                                                                                                                                                                                                                                                                                                                                                                                                                                                                                                                                                                                                                                                                                                           |                                                                                                                                                                                                                                                                                                                  |
| <i>Typical Samples &amp; Images:</i>                                                                                                                                                                                                                                                                                                                                                                                                                                                                                                                                                                                                                                                                                                                                                                                                                                                                                                                                                                                                                                                                                                                                                                                                                                                                                                                                                                                                                                                                                                                                                                                                                                                                                                                                                                                                                                                                                                                                                                                                                                                                                                                                                                                                                                                                                                                                                                                                                                                            |                                                                                                                                                                                                                                                                                                                  |

### S1-13 Radical Formation Potential

|                                                                                                                                                                                                                                                                                                                                                                                                                                                                                                                                                                                                                                                                                                                                                                                                                                                                                                                                                                                                                                                                                                                                                                                                                                                                                                                                                                                                                                                                                                                                                                                                                                                                                                                                                                                                                                                                                                                                                                                                                                                                                                                              |                                                                                                                                                                                                                                                                                     |
|------------------------------------------------------------------------------------------------------------------------------------------------------------------------------------------------------------------------------------------------------------------------------------------------------------------------------------------------------------------------------------------------------------------------------------------------------------------------------------------------------------------------------------------------------------------------------------------------------------------------------------------------------------------------------------------------------------------------------------------------------------------------------------------------------------------------------------------------------------------------------------------------------------------------------------------------------------------------------------------------------------------------------------------------------------------------------------------------------------------------------------------------------------------------------------------------------------------------------------------------------------------------------------------------------------------------------------------------------------------------------------------------------------------------------------------------------------------------------------------------------------------------------------------------------------------------------------------------------------------------------------------------------------------------------------------------------------------------------------------------------------------------------------------------------------------------------------------------------------------------------------------------------------------------------------------------------------------------------------------------------------------------------------------------------------------------------------------------------------------------------|-------------------------------------------------------------------------------------------------------------------------------------------------------------------------------------------------------------------------------------------------------------------------------------|
| <p><i>Test for reactive oxygen species by DCF (DCF test):</i></p>                                                                                                                                                                                                                                                                                                                                                                                                                                                                                                                                                                                                                                                                                                                                                                                                                                                                                                                                                                                                                                                                                                                                                                                                                                                                                                                                                                                                                                                                                                                                                                                                                                                                                                                                                                                                                                                                                                                                                                                                                                                            | <p>Category: C. Particle Characterization in and ex-situ<br/> Institute: KIT<br/> Location: Eggenstein-Leopoldshafen, Campus North<br/> Contact Details of Technology Expert:<br/> Name: Dr. Silvia Diabate<br/> Phone: ++49-721/608-2-2692<br/> E-mail: silvia.diabate@kit.edu</p> |
| <p><i>Material</i></p> <ul style="list-style-type: none"> <li>• 5 mM 2',7'-dichlorodihydrofluorescein-diacetate (DCFH<sub>2</sub>-DA, Invitrogen, Karlsruhe, Germany) in ethanol, stored in aliquots at -20°C</li> <li>• 0.01 N sodium hydroxide (NaOH) solution, prepared from NaOH pellets (Merck, Darmstadt, Germany).</li> <li>• Phosphate buffered saline (PBS) without Ca<sup>2+</sup>, without Mg<sup>2+</sup>, pH 7.4 (Invitrogen, Karlsruhe, Germany)</li> <li>• Peroxidase from horseradish (HRP, Sigma, Taufkirchen, Germany)</li> <li>• 30% hydrogen peroxide (H<sub>2</sub>O<sub>2</sub>, Sigma, Taufkirchen, Germany)</li> </ul> <p><i>Test procedure</i></p> <p>The test uses the oxidation of the non-fluorescent 2',7'-dichlorodihydrofluorescein (DCFH<sub>2</sub>) to the fluorescent 2',7'-dichlorofluorescein (DCF) as an indicator for the presence of reactive oxygen species. Therefore, the commercial substance DCFH<sub>2</sub>-DA must be deacetylated with NaOH. 0.1 ml of 5 mM DCFH<sub>2</sub>-DA in ethanol is mixed with 2.4 mL of 0.01 N NaOH and incubated at room temperature (24°C) for 30 min. For neutralization, 10 ml PBS is added and kept on ice in the dark until use. Just prior to use, HRP is added as a catalyst (2.2 U/ml). The DCFH<sub>2</sub> concentration in the working solution is 40 µM.</p> <p>Suspensions of test particles are sonified for 10 min and different concentrations are prepared in PBS. H<sub>2</sub>O<sub>2</sub> standard preparations (0.04 to 10 µM) are prepared as well. The test solutions are mixed 1:1 (v/v) with the prepared DCFH<sub>2</sub> solution and incubated at 37°C for 15 min in the dark. The solution is then centrifuged (20,000 × g for 15 min) to remove the particles and the fluorescence of the supernatant is monitored at 485 nm excitation and 530 nm emission using a fluorescence microplate reader (e.g. BIO-TEK FL600 from MWG-Biotech AG, Ebersberg, Germany). Solutions containing polystyrene nanoparticles were centrifuged for 1 h. Results are expressed as fold changes of the particle free sample.</p> |                                                                                                                                                                                                                                                                                     |
| <p><i>Main Features (Equipment Capabilities):</i></p> <p>Fluorimeter, 485 nm excitation and 530 nm emission</p>                                                                                                                                                                                                                                                                                                                                                                                                                                                                                                                                                                                                                                                                                                                                                                                                                                                                                                                                                                                                                                                                                                                                                                                                                                                                                                                                                                                                                                                                                                                                                                                                                                                                                                                                                                                                                                                                                                                                                                                                              |                                                                                                                                                                                                                                                                                     |
| <p><i>References</i></p> <p>Cathcart, R., Schwiers, E., and Ames, B.N. (1983). Detection of picomole levels of hydroperoxides using a fluorescent dichlorofluorescein assay. <i>Anal. Biochem.</i> 134, 111-116.</p> <p>Foucaud, L., Wilson, M.R., Brown, D.M., and Stone, V. (2007). Measurement of reactive species production by nanoparticles prepared in biologically relevant media. <i>Toxicol. Lett.</i> 174, 1-9.</p>                                                                                                                                                                                                                                                                                                                                                                                                                                                                                                                                                                                                                                                                                                                                                                                                                                                                                                                                                                                                                                                                                                                                                                                                                                                                                                                                                                                                                                                                                                                                                                                                                                                                                               |                                                                                                                                                                                                                                                                                     |
| <p><i>Any further Information:</i></p> <p>about 100 mg of particles are necessary for the test</p>                                                                                                                                                                                                                                                                                                                                                                                                                                                                                                                                                                                                                                                                                                                                                                                                                                                                                                                                                                                                                                                                                                                                                                                                                                                                                                                                                                                                                                                                                                                                                                                                                                                                                                                                                                                                                                                                                                                                                                                                                           |                                                                                                                                                                                                                                                                                     |

| <b>REPRESENTATIVE TEST PARTICLES</b><br>Nanomaterial Identification<br>according to OECD<br>ENV/JM/MONO(2009)20/REV pp29. |                                                |                                         |                                                                                                                                                                          |  Research Infrastructure<br><b>QualityNano</b> |                                                                 |
|---------------------------------------------------------------------------------------------------------------------------|------------------------------------------------|-----------------------------------------|--------------------------------------------------------------------------------------------------------------------------------------------------------------------------|----------------------------------------------------------------------------------------------------------------------------------|-----------------------------------------------------------------|
| Nanomaterial name                      Silica-NP<br>Particle Code                              SiINP_002                  |                                                |                                         | <b>Manufacturer /Institute:</b><br>Eugene Mahon , provided by UCD<br><b>Technology Expert:</b> Eugene Mahon                                                              |                                                                                                                                  |                                                                 |
| Composition                                SiO <sub>2</sub><br>Method of production                      Stöber-Synthesis |                                                |                                         |                                                                                                                                                                          |                                                                                                                                  |                                                                 |
| <b>Kind of suspension:</b>                                                                                                |                                                |                                         | <b>Suspension</b> <input checked="" type="checkbox"/> <b>Powder</b> <input type="checkbox"/><br>Suspended in <u>Pure water</u><br>pH <u>??</u><br>stabilizer <u>none</u> |                                                                                                                                  |                                                                 |
| <b>Property</b>                                                                                                           |                                                | <b>unit</b>                             | <b>Method / Institute</b>                                                                                                                                                |                                                                                                                                  | <b>Value</b>                                                    |
| Agglomeration/aggregation                                                                                                 |                                                |                                         | HRTEM (KIT)                                                                                                                                                              |                                                                                                                                  | Aggregated                                                      |
| Crystalline phase                                                                                                         |                                                |                                         | D5000 Diffractometer /UU<br>PANalytical X'Pert diffractometer /ICN                                                                                                       |                                                                                                                                  | Amorphous                                                       |
| Crystallite size                                                                                                          |                                                |                                         | HRTEM (KIT)                                                                                                                                                              |                                                                                                                                  | n.a.                                                            |
| Octanol-water partition coefficient                                                                                       |                                                |                                         | Extraction/ ICP-MS (ICN)                                                                                                                                                 |                                                                                                                                  | P <sub>OW</sub> =0                                              |
| Photocatalytic activity                                                                                                   |                                                |                                         | Rhodamin-B Bleaching/UV-B-100<br>10mg/ml in Water (ICN)                                                                                                                  |                                                                                                                                  | 10% / 10 min                                                    |
| Porosity                                                                                                                  |                                                | -/- or %                                | n.a.                                                                                                                                                                     |                                                                                                                                  | n.a.                                                            |
| Pour density                                                                                                              |                                                | cm <sup>3</sup> /g                      | (BJH) Pore Size Distribution and<br>Volume by ASAP2020 (UU)                                                                                                              |                                                                                                                                  | n.a.                                                            |
| Redox potential                                                                                                           |                                                |                                         |                                                                                                                                                                          |                                                                                                                                  |                                                                 |
| Size distribution:<br>(suspension in<br>water)                                                                            | Modal value X <sub>M</sub> (PDI)               | nm                                      | Zetasizer Nano ZS /UU<br><br>Zetasizer Nano ZS /UCD                                                                                                                      |                                                                                                                                  | 82.7±0.35 (PDI:<br>0.049)<br><br>87.4(PDI:0.057)/N<br>M: 67.5   |
|                                                                                                                           | Total concentration                            | mg/ml                                   |                                                                                                                                                                          |                                                                                                                                  | 0.1 – 2 mg/ml                                                   |
| Size distribution:<br>(Aerosol)                                                                                           | Modal value X <sub>M</sub> (σ <sub>geo</sub> ) | nm                                      | SMPS TSI, DMA 3071 with CPC<br>3022A / KIT<br>dispersed by AGF2.0                                                                                                        |                                                                                                                                  | 40 nm (soluble<br>comp.?)<br><br>70 nm (σ <sub>geo</sub> =1.42) |
|                                                                                                                           | Total concentration                            | mg/cm <sup>3</sup> or #/cm <sup>3</sup> |                                                                                                                                                                          |                                                                                                                                  | 1 x 10 <sup>5</sup> /cm <sup>3</sup>                            |
| Solubility in _____                                                                                                       |                                                | g/l                                     |                                                                                                                                                                          |                                                                                                                                  |                                                                 |
| Solubility in H <sub>2</sub> O                                                                                            |                                                | g/l                                     | Extraction/ ICP-MS (ICN)                                                                                                                                                 |                                                                                                                                  | 30.8±2.1                                                        |
| Specific surface area                                                                                                     |                                                | cm <sup>2</sup> /g                      | BET by ASAP2020 (UU)                                                                                                                                                     |                                                                                                                                  | n.a.                                                            |
| Surface chemistry                                                                                                         |                                                |                                         |                                                                                                                                                                          |                                                                                                                                  |                                                                 |
| Zeta potential (surface charge)                                                                                           |                                                | eV                                      | Zetasizer Nano ZS /UU                                                                                                                                                    |                                                                                                                                  | -51.7 ± 1.2eV<br>(pH 9.23)                                      |

|                                                                                                                                                                                                 |      |                                                                                                                                                                                                                                                                                                                                         |      |
|-------------------------------------------------------------------------------------------------------------------------------------------------------------------------------------------------|------|-----------------------------------------------------------------------------------------------------------------------------------------------------------------------------------------------------------------------------------------------------------------------------------------------------------------------------------------|------|
| Summary of trace analyses                                                                                                                                                                       |      | ICP-MS / KIT                                                                                                                                                                                                                                                                                                                            |      |
| Ni                                                                                                                                                                                              | µg/g |                                                                                                                                                                                                                                                                                                                                         | <0.5 |
| Cu                                                                                                                                                                                              | µg/g |                                                                                                                                                                                                                                                                                                                                         | 1.0  |
| <b>Electron microscopy</b><br>Method / technical data of microscope:<br>SOP: See KIT (LEM)<br><br>Magnification: 450.000<br><br><br><br><br><br><br><br><br><br>FEI Tecna i 120<br>SOP: see UCD |      | <b>Electron Microscopy by KIT (LEM)</b><br><br><br>Mean Diameter : 69 nm<br><br><b>Electron Microscopy by UCD</b><br><br>Av. Diameter (ImageJ,200 particles) = 68nm |      |
| Radical formation potential by DCF-Test:<br>(H <sub>2</sub> O <sub>2</sub> as positive control) (KIT)                                                                                           |      | <br>Result: SiNP_002 NPs induced a very low increase of DCFH oxidation at high concentrations indicating a negligible potential to produce reactive oxygen species.                                                                                  |      |
| Comments and other relevant physical-chemical properties and material characterization information                                                                                              |      |                                                                                                                                                                                                                                                                                                                                         |      |
| Place, Date Karlsruhe, 18.03.2013                                                                                                                                                               |      | Responsible H.-R. Paur, KIT                                                                                                                                                                                                                                                                                                             |      |

| <b>REPRESENTATIVE TEST PARTICLES</b><br>Nanomaterial Identification<br>according to OECD<br>ENV/JM/MONO(2009)20/REV pp29. |                                                |                                                                                                                                                                               |  Research Infrastructure<br><b>QualityNano</b> |                                               |
|---------------------------------------------------------------------------------------------------------------------------|------------------------------------------------|-------------------------------------------------------------------------------------------------------------------------------------------------------------------------------|----------------------------------------------------------------------------------------------------------------------------------|-----------------------------------------------|
| Nanomaterial name                      Silica-NP<br>Particle Code                              SilNP_003                  |                                                | <b>Manufacturer /Institute/Date</b><br><b>Eugene Mahon ; provided by UCD; 10/2011</b><br><br><b>Technology Expert:</b> Eugene Mahon                                           |                                                                                                                                  |                                               |
| Composition                                SiO <sub>2</sub><br>Method of production                      Stöber-Synthesis |                                                |                                                                                                                                                                               |                                                                                                                                  |                                               |
| <b>Kind of suspension:</b>                                                                                                |                                                | <b>Suspension</b> <input checked="" type="checkbox"/> <b>Powder</b> <input type="checkbox"/><br><br>Suspended in <u>Pure water</u><br>pH <u>n.d</u><br>stabilizer <u>none</u> |                                                                                                                                  |                                               |
| Property                                                                                                                  | unit                                           | Method / Institute                                                                                                                                                            | Value                                                                                                                            |                                               |
| Agglomeration/aggregation                                                                                                 |                                                | HRTEM (KIT)                                                                                                                                                                   | Agglomerated                                                                                                                     |                                               |
| Crystalline phase                                                                                                         |                                                | D5000 Diffractometer (UU)<br>PANalytical X'Pert diffractometer (ICN)                                                                                                          | Amorphous                                                                                                                        |                                               |
| Crystallite size                                                                                                          |                                                | HRTEM (KIT)                                                                                                                                                                   | n.a.                                                                                                                             |                                               |
| Octanol-water partition coefficient                                                                                       |                                                | Extraction/ ICP-MS (ICN)                                                                                                                                                      | n.a.                                                                                                                             |                                               |
| Photocatalytic activity                                                                                                   |                                                | Rhodamin-B Bleaching/UV-B-100<br>10mg/ml in Water (ICN)                                                                                                                       | medium                                                                                                                           |                                               |
| Porosity                                                                                                                  | -/- or %                                       | n.a.                                                                                                                                                                          | n.a.                                                                                                                             |                                               |
| Pour density                                                                                                              | cm <sup>3</sup> /g                             | (BJH) Pore Size Distribution and<br>Volume by ASAP2020 (UU)                                                                                                                   | n.a.                                                                                                                             |                                               |
| Size distribution:<br>(suspension in<br>water)                                                                            | Modal value X <sub>M</sub> (PDI)               | nm                                                                                                                                                                            | Zetasizer Nano ZS /UCD<br>DCS (UCD) (RWtAv / RNumAv)                                                                             | 129.3 (PDI:0.017)/<br>NM: 109.4<br>102.7/99.8 |
|                                                                                                                           | Total concentration                            | mg/ml                                                                                                                                                                         |                                                                                                                                  | 1mg/ml                                        |
| Size distribution:<br>(Aerosol)                                                                                           | Modal value X <sub>M</sub> (σ <sub>geo</sub> ) | nm                                                                                                                                                                            | SMPS TSI, DMA 3071 with CPC<br>3022A / KIT<br>dispersed by electrospray                                                          | 118 (σ <sub>geo</sub> =1.12)                  |
|                                                                                                                           | Total concentration                            | mg/cm <sup>3</sup> or #/cm <sup>3</sup>                                                                                                                                       |                                                                                                                                  | 7.31x 10 <sup>3</sup> /cm <sup>3</sup>        |
| Solubility in _____                                                                                                       | g/l                                            |                                                                                                                                                                               |                                                                                                                                  |                                               |
| Solubility in H <sub>2</sub> O                                                                                            | g/l                                            | Extraction/ ICP-MS (ICN)                                                                                                                                                      | 392.2 g/L                                                                                                                        |                                               |
| Specific surface area                                                                                                     | cm <sup>2</sup> /g                             | BET by ASAP2020 (UU)                                                                                                                                                          | n.a.                                                                                                                             |                                               |
| Surface chemistry                                                                                                         |                                                |                                                                                                                                                                               |                                                                                                                                  |                                               |
| Zeta potential (surface charge)                                                                                           | eV                                             | Zetasizer Nano ZS /UU                                                                                                                                                         | -60.9±10.2eV<br>(pH 8.74)                                                                                                        |                                               |
| Summary of trace analyses                                                                                                 |                                                | ICP-MS / KIT                                                                                                                                                                  |                                                                                                                                  |                                               |
| B                                                                                                                         | µg/g                                           |                                                                                                                                                                               | 22.0                                                                                                                             |                                               |
| Na                                                                                                                        | µg/g                                           |                                                                                                                                                                               | 36.0                                                                                                                             |                                               |
| K                                                                                                                         | µg/g                                           |                                                                                                                                                                               | 12.4                                                                                                                             |                                               |
| Ca                                                                                                                        | µg/g                                           |                                                                                                                                                                               | 36.0                                                                                                                             |                                               |

**Electron microscopy**

Method / technical data of microscope:

SOP: See KIT (LEM)

magnification: 450.000



Electron Microscopy by KIT (LEM); Diameter : 70-120 nm

FEI Tecna i 120

SOP: see UCD



Electron Microscopy by UCD

Av. Diameter (ImageJ, XX particles) = 122nm

Radical formation potential by DCF-Test:

(H<sub>2</sub>O<sub>2</sub> as positive control) (KIT)

Result: SiNP\_003 NPs induced no significant DCFH oxidation indicating no potential to produce reactive oxygen species.

SiNP\_003\_Corona Fingerprint\_UCD

**Comments and other relevant physical-chemical properties and material characterization information****Place, Date** Karlsruhe, 29.11.2016**Responsible** H.-R. Paur, KIT

| <b>REPRESENTATIVE TEST PARTICLES</b><br>Nanomaterial Identification<br>according to OECD<br>ENV/JM/MONO(2009)20/REV pp29. |                                                |                                                                                                                                                                            |                                                                         |  Research Infrastructure<br><b>QualityNano</b> |                                            |
|---------------------------------------------------------------------------------------------------------------------------|------------------------------------------------|----------------------------------------------------------------------------------------------------------------------------------------------------------------------------|-------------------------------------------------------------------------|----------------------------------------------------------------------------------------------------------------------------------|--------------------------------------------|
| Nanomaterial name                      Silica-NP<br>Particle Code                              SilNP_004                  |                                                | <b>Manufacturer /Institute/Date</b><br>Eugene Mahon ; provided by UCD; 10/2011<br><b>Technology Expert:</b> Eugene Mahon                                                   |                                                                         |                                                                                                                                  |                                            |
| Composition                                SiO <sub>2</sub><br>Method of production                      Stöber-Synthesis |                                                |                                                                                                                                                                            |                                                                         |                                                                                                                                  |                                            |
| <b>Kind of suspension:</b>                                                                                                |                                                | <b>Suspension</b> <input checked="" type="checkbox"/> <b>Powder</b> <input type="checkbox"/><br>Suspended in <u>Pure water</u><br>pH <u>n.d.</u><br>stabilizer <u>none</u> |                                                                         |                                                                                                                                  |                                            |
| Property                                                                                                                  |                                                | unit                                                                                                                                                                       | Method / Institute                                                      |                                                                                                                                  | Value                                      |
| Agglomeration/aggregation                                                                                                 |                                                |                                                                                                                                                                            | HRTEM (KIT)                                                             |                                                                                                                                  | Agglomerated                               |
| Crystalline phase                                                                                                         |                                                |                                                                                                                                                                            | D5000 Diffractometer (UU)<br>PANalytical X'Pert diffractometer (ICN)    |                                                                                                                                  | Amorphous                                  |
| Crystallite size                                                                                                          |                                                |                                                                                                                                                                            | HRTEM (KIT)                                                             |                                                                                                                                  | n.a.                                       |
| Octanol-water partition coefficient                                                                                       |                                                |                                                                                                                                                                            | Extraction/ ICP-MS (ICN)                                                |                                                                                                                                  |                                            |
| Photocatalytic activity                                                                                                   |                                                |                                                                                                                                                                            | Rhodamin-B Bleaching/UV-B-100<br>10mg/ml in Water (ICN)                 |                                                                                                                                  | none                                       |
| Porosity                                                                                                                  |                                                | -/- or %                                                                                                                                                                   | n.a.                                                                    |                                                                                                                                  | n.a.                                       |
| Pour density                                                                                                              |                                                | cm <sup>3</sup> /g                                                                                                                                                         | (BJH) Pore Size Distribution and<br>Volume by ASAP2020 (UU)             |                                                                                                                                  | n.a.                                       |
| Size distribution:<br>(suspension in<br>water)                                                                            | Modal value X <sub>M</sub> (PDI)               | nm                                                                                                                                                                         | Zetasizer Nano ZS /UCD<br>DCS (UCD) (RWtAv / RNumAv)                    |                                                                                                                                  | 75.15 (PDI:0.042)<br>NM: 59.9<br>61.9/56.9 |
|                                                                                                                           | Total concentration                            | mg/ml                                                                                                                                                                      |                                                                         |                                                                                                                                  | 1mg/ml                                     |
| Size distribution:<br>(Aerosol)                                                                                           | Modal value X <sub>M</sub> (σ <sub>geo</sub> ) | nm                                                                                                                                                                         | SMPS TSI, DMA 3071 with CPC<br>3022A / KIT<br>dispersed by electrospray |                                                                                                                                  | 65 (σ <sub>geo</sub> =1.125)               |
|                                                                                                                           | Total concentration                            | mg/cm <sup>3</sup> or #/cm <sup>3</sup>                                                                                                                                    |                                                                         |                                                                                                                                  | 1.04x 10 <sup>4</sup> /cm <sup>3</sup>     |
| Solubility in _____                                                                                                       |                                                | g/l                                                                                                                                                                        |                                                                         |                                                                                                                                  |                                            |
| Solubility in H <sub>2</sub> O                                                                                            |                                                | g/l                                                                                                                                                                        | Extraction/ ICP-MS (ICN)                                                |                                                                                                                                  | 298.0 g/L                                  |
| Specific surface area                                                                                                     |                                                | cm <sup>2</sup> /g                                                                                                                                                         | BET by ASAP2020 (UU)                                                    |                                                                                                                                  | n.a.                                       |
| Surface chemistry                                                                                                         |                                                |                                                                                                                                                                            |                                                                         |                                                                                                                                  |                                            |
| Zeta potential (surface charge)                                                                                           |                                                | eV                                                                                                                                                                         | Zetasizer Nano ZS /UU                                                   |                                                                                                                                  | -54.9 ± 14.0eV<br>(pH 8.93)                |
| Summary of trace analyses                                                                                                 |                                                |                                                                                                                                                                            | ICP-MS / KIT                                                            |                                                                                                                                  |                                            |
| B                                                                                                                         |                                                | µg/g                                                                                                                                                                       |                                                                         |                                                                                                                                  | 14.8                                       |
| Na                                                                                                                        |                                                | µg/g                                                                                                                                                                       |                                                                         |                                                                                                                                  | 30.0                                       |
| Mg                                                                                                                        |                                                | µg/g                                                                                                                                                                       |                                                                         |                                                                                                                                  | 10.0                                       |
| Ca                                                                                                                        |                                                | µg/g                                                                                                                                                                       |                                                                         |                                                                                                                                  | 46.0                                       |
| Zn                                                                                                                        |                                                | µg/g                                                                                                                                                                       |                                                                         |                                                                                                                                  | 0.8                                        |

### Electron microscopy

Method / technical data of microscope:

SOP: See KIT (LEM)

Magnification: 450.000

FEI Tecna i 120

SOP: see UCD



Electron Microscopy by KIT (LEM); Diameter : 40-70 nm



Electron Microscopy by UCD

Av. Diameter (ImageJ) = 68.45nm

Radical formation potential by DCF-Test:

(H<sub>2</sub>O<sub>2</sub> as positive control) (KIT)



Result: SiNP\_04 NPs induced a significant DCFH oxidation at high concentrations indicating a potential to produce reactive oxygen species.

SiNP\_004\_Corona Fingerprint\_UCD



Comments and other relevant physical-chemical properties and material characterization information

Place, Date Karlsruhe, 28.02.2013

Responsible H.-R. Paur, KIT

| <b>REPRESENTATIVE TEST PARTICLES</b><br>Nanomaterial Identification<br>according to OECD<br>ENV/JM/MONO(2009)20/REV pp29. |                                                |                                                                                                                                                                            |  Research Infrastructure<br><b>QualityNano</b> |                                             |
|---------------------------------------------------------------------------------------------------------------------------|------------------------------------------------|----------------------------------------------------------------------------------------------------------------------------------------------------------------------------|----------------------------------------------------------------------------------------------------------------------------------|---------------------------------------------|
| Nanomaterial name                      Silica-NP<br>Particle Code                              SilNP_005                  |                                                | <b>Manufacturer /Institute/Date</b><br><b>Eugene Mahon ; provided by UCD; 10/2011</b><br><b>Technology Expert:</b> Eugene Mahon                                            |                                                                                                                                  |                                             |
| Composition                                SiO <sub>2</sub><br>Method of production                      Stöber-Synthesis |                                                |                                                                                                                                                                            |                                                                                                                                  |                                             |
| <b>Kind of suspension:</b>                                                                                                |                                                | <b>Suspension</b> <input checked="" type="checkbox"/> <b>Powder</b> <input type="checkbox"/><br>Suspended in <u>Pure water</u><br>pH <u>n.d.</u><br>stabilizer <u>none</u> |                                                                                                                                  |                                             |
| Property                                                                                                                  | unit                                           | Method / Institute                                                                                                                                                         | Value                                                                                                                            |                                             |
| Agglomeration/aggregation                                                                                                 |                                                | HRTEM (KIT)                                                                                                                                                                | Agglomerated                                                                                                                     |                                             |
| Crystalline phase                                                                                                         |                                                | D5000 Diffractometer (UU)<br>PANalytical X'Pert diffractometer (ICN)                                                                                                       | Amorphous                                                                                                                        |                                             |
| Crystallite size                                                                                                          |                                                | HRTEM (KIT)                                                                                                                                                                | n.a.                                                                                                                             |                                             |
| Octanol-water partition coefficient                                                                                       |                                                | Extraction/ ICP-MS (ICN)                                                                                                                                                   | n.a.                                                                                                                             |                                             |
| Photocatalytic activity                                                                                                   |                                                | Rhodamin-B Bleaching/UV-B-100<br>10mg/ml in Water (ICN)                                                                                                                    | none                                                                                                                             |                                             |
| Porosity                                                                                                                  | -/- or %                                       | n.a.                                                                                                                                                                       | n.a.                                                                                                                             |                                             |
| Pour density                                                                                                              | cm <sup>3</sup> /g                             | (BJH) Pore Size Distribution and<br>Volume by ASAP2020 (UU)                                                                                                                | n.a.                                                                                                                             |                                             |
| Size distribution:<br>(suspension in<br>water)                                                                            | Modal value X <sub>M</sub> (PDI)               | nm                                                                                                                                                                         | Zetasizer Nano ZS /UCD<br>DCS (UCD) (RWtAv / RNumAv)                                                                             | 64.4(PDI:0.091)/<br>NM: 43.9<br>45.5 / 41.9 |
|                                                                                                                           | Total concentration                            | mg/ml                                                                                                                                                                      |                                                                                                                                  | 1 mg/ml                                     |
| Size distribution:<br>(Aerosol)                                                                                           | Modal value X <sub>M</sub> (σ <sub>geo</sub> ) | nm                                                                                                                                                                         | SMPS TSI, DMA 3071 with CPC<br>3022A / KIT<br>dispersed by electrospray                                                          | 52 nm (σ <sub>geo</sub> =1.25)              |
|                                                                                                                           | Total concentration                            | mg/cm <sup>3</sup> or #/cm <sup>3</sup>                                                                                                                                    |                                                                                                                                  | 1.05x 10 <sup>5</sup> /cm <sup>3</sup>      |
| Solubility in _____                                                                                                       | g/l                                            |                                                                                                                                                                            |                                                                                                                                  |                                             |
| Solubility in H <sub>2</sub> O                                                                                            | g/l                                            | Extraction/ ICP-MS (ICN)                                                                                                                                                   | 165.0 g/L                                                                                                                        |                                             |
| Specific surface area                                                                                                     | cm <sup>2</sup> /g                             | BET by ASAP2020 (UU)                                                                                                                                                       | n.a.                                                                                                                             |                                             |
| Surface chemistry                                                                                                         |                                                |                                                                                                                                                                            |                                                                                                                                  |                                             |
| Zeta potential (surface charge)                                                                                           | eV                                             | Zetasizer Nano ZS /UU                                                                                                                                                      | -51.1 ± 13.9eV<br>(pH 8.91)                                                                                                      |                                             |
| Summary of trace analyses                                                                                                 |                                                | ICP-MS / KIT                                                                                                                                                               |                                                                                                                                  |                                             |
| Cu                                                                                                                        | µg/g                                           |                                                                                                                                                                            | 6.0                                                                                                                              |                                             |

### Electron microscopy

Method / technical data of microscope:

SOP: See KIT (LEM)

Magnification: 450.000



Electron Microscopy by KIT (LEM); Diameter : 30-50 nm

FEI Tecna i 120

SOP: see UCD



Electron Microscopy by UCD

Av. Diameter (ImageJ) = 40.6nm

Radical formation potential by DCF-Test:

(H<sub>2</sub>O<sub>2</sub> as positive control) (KIT)



Result: SiNP\_005 NPs induced a very low increase of DCFH oxidation at high concentrations indicating a negligible potential to produce reactive oxygen species.

SiNP\_005\_Corona Fingerprint\_UCD



Comments and other relevant physical-chemical properties and material characterization information

Place, Date Karlsruhe, 29.11.2016

Responsible H.-R. Paur, KIT

| <b>REPRESENTATIVE TEST PARTICLES</b><br>Nanomaterial Identification<br>according to OECD<br>ENV/JM/MONO(2009)20/REV pp29. |                                                |                                                                                                                                                                            |                                                                         |  Research Infrastructure<br><b>QualityNano</b> |                                            |
|---------------------------------------------------------------------------------------------------------------------------|------------------------------------------------|----------------------------------------------------------------------------------------------------------------------------------------------------------------------------|-------------------------------------------------------------------------|----------------------------------------------------------------------------------------------------------------------------------|--------------------------------------------|
| Nanomaterial name                      Silica-NP<br>Particle Code                              SilNP_006                  |                                                | <b>Manufacturer /Institute/Date</b><br><b>Eugene Mahon ; provided by UCD; 10/2011</b><br><b>Technology Expert:</b> Eugene Mahon                                            |                                                                         |                                                                                                                                  |                                            |
| Composition                              SiO <sub>2</sub><br>Method of production                      Stöber-Synthesis   |                                                |                                                                                                                                                                            |                                                                         |                                                                                                                                  |                                            |
| <b>Kind of suspension:</b>                                                                                                |                                                | <b>Suspension</b> <input checked="" type="checkbox"/> <b>Powder</b> <input type="checkbox"/><br>Suspended in <u>Pure water</u><br>pH <u>n.d.</u><br>stabilizer <u>none</u> |                                                                         |                                                                                                                                  |                                            |
| Property                                                                                                                  |                                                | unit                                                                                                                                                                       | Method / Institute                                                      |                                                                                                                                  | Value                                      |
| Agglomeration/aggregation                                                                                                 |                                                |                                                                                                                                                                            | HRTEM (KIT)                                                             |                                                                                                                                  | Agglomerated                               |
| Crystalline phase                                                                                                         |                                                |                                                                                                                                                                            | D5000 Diffractometer (UU)<br>PANalytical X'Pert diffractometer (ICN)    |                                                                                                                                  | Amorphous                                  |
| Crystallite size                                                                                                          |                                                |                                                                                                                                                                            | HRTEM (KIT)                                                             |                                                                                                                                  | n.a.                                       |
| Octanol-water partition coefficient                                                                                       |                                                |                                                                                                                                                                            | Extraction/ ICP-MS (ICN)                                                |                                                                                                                                  | n.a.                                       |
| Photocatalytic activity                                                                                                   |                                                |                                                                                                                                                                            | Rhodamin-B Bleaching/UV-B-100<br>10mg/ml in Water (ICN)                 |                                                                                                                                  | medium                                     |
| Porosity                                                                                                                  |                                                | -/- or %                                                                                                                                                                   | n.a.                                                                    |                                                                                                                                  | n.a.                                       |
| Pour density                                                                                                              |                                                | cm <sup>3</sup> /g                                                                                                                                                         | (BJH) Pore Size Distribution and<br>Volume by ASAP2020 (UU)             |                                                                                                                                  | n.a.                                       |
| Size distribution:<br>(suspension in<br>water)                                                                            | Modal value X <sub>M</sub> (PDI)               | nm                                                                                                                                                                         | Zetasizer Nano ZS /UCD<br>DCS (UCD) (RWtAv / RNumAv)                    |                                                                                                                                  | 87.7 (PDI:0.231)<br>NM: 41.2<br>48.8/37.25 |
|                                                                                                                           | Total concentration                            | mg/ml                                                                                                                                                                      |                                                                         |                                                                                                                                  | 1mg/ml                                     |
| Size distribution:<br>(Aerosol)                                                                                           | Modal value X <sub>M</sub> (σ <sub>geo</sub> ) | nm                                                                                                                                                                         | SMPS TSI, DMA 3071 with CPC<br>3022A / KIT<br>dispersed by electrospray |                                                                                                                                  | 58 (σ <sub>geo</sub> =1.46)                |
|                                                                                                                           | Total concentration                            | mg/cm <sup>3</sup> or #/cm <sup>3</sup>                                                                                                                                    |                                                                         |                                                                                                                                  | 5.88x 10 <sup>4</sup> /cm <sup>3</sup>     |
| Solubility in _____                                                                                                       |                                                | g/l                                                                                                                                                                        |                                                                         |                                                                                                                                  |                                            |
| Solubility in H <sub>2</sub> O                                                                                            |                                                | g/l                                                                                                                                                                        | Extraction/ ICP-MS (ICN)                                                |                                                                                                                                  | 55.6 g/L                                   |
| Specific surface area                                                                                                     |                                                | cm <sup>2</sup> /g                                                                                                                                                         | BET by ASAP2020 (UU)                                                    |                                                                                                                                  | n.a.                                       |
| Surface chemistry                                                                                                         |                                                |                                                                                                                                                                            |                                                                         |                                                                                                                                  |                                            |
| Zeta potential (surface charge)                                                                                           |                                                | eV                                                                                                                                                                         | Zetasizer Nano ZS /UU                                                   |                                                                                                                                  | -45.3±6.6eV<br>(pH 7.72)                   |
| Summary of trace analyses                                                                                                 |                                                |                                                                                                                                                                            | ICP-MS / KIT                                                            |                                                                                                                                  |                                            |
| B                                                                                                                         |                                                | µg/g                                                                                                                                                                       |                                                                         |                                                                                                                                  | 40.0                                       |
| Na                                                                                                                        |                                                | µg/g                                                                                                                                                                       |                                                                         |                                                                                                                                  | 32.0                                       |
| K                                                                                                                         |                                                | µg/g                                                                                                                                                                       |                                                                         |                                                                                                                                  | 24.0                                       |
| Ca                                                                                                                        |                                                | µg/g                                                                                                                                                                       |                                                                         |                                                                                                                                  | 82.0                                       |
| Cu                                                                                                                        |                                                | µg/g                                                                                                                                                                       |                                                                         |                                                                                                                                  | 18.0                                       |
| Zn                                                                                                                        |                                                | µg/g                                                                                                                                                                       |                                                                         |                                                                                                                                  | 6.2                                        |

### Electron microscopy

Method / technical data of microscope:

SOP: See KIT (LEM)

Magnification: 450.000

FEI Tecna i 120

SOP: see UCD



Electron Microscopy by KIT (LEM);  
Diameter : Typical particle size is about 20 nm



Electron Microscopy by UCD  
Av. Diameter (ImageJ) = 21.92nm

Radical formation potential by DCF-Test:

(H<sub>2</sub>O<sub>2</sub> as positive control) (KIT)



Result: SiNP\_006 NPs induced a very low increase of DCFH oxidation at high concentrations indicating a negligible potential to produce reactive oxygen species.

SiNP\_006\_Corona Fingerprint\_UCD



Comments and other relevant physical-chemical properties and material characterization information

Place, Date Karlsruhe, 29.11.2016

Responsible H.-R. Paur, KIT

| <b>REPRESENTATIVE TEST PARTICLES</b><br>Nanomaterial Identification<br>according to OECD<br>ENV/JM/MONO(2009)20/REV pp29. |                                                |                                                                                                                                                                            |                                                                         |  Research Infrastructure<br><b>QualityNano</b> |                                           |
|---------------------------------------------------------------------------------------------------------------------------|------------------------------------------------|----------------------------------------------------------------------------------------------------------------------------------------------------------------------------|-------------------------------------------------------------------------|----------------------------------------------------------------------------------------------------------------------------------|-------------------------------------------|
| Nanomaterial name                      Silica-NP<br>Particle Code                              SilNP_007                  |                                                | <b>Manufacturer /Institute/Date</b><br>Eugene Mahon ; provided by UCD; 10/2011<br><b>Technology Expert:</b> Eugene Mahon                                                   |                                                                         |                                                                                                                                  |                                           |
| Composition                                SiO <sub>2</sub><br>Method of production                      Stöber-Synthesis |                                                |                                                                                                                                                                            |                                                                         |                                                                                                                                  |                                           |
| <b>Kind of suspension:</b>                                                                                                |                                                | <b>Suspension</b> <input checked="" type="checkbox"/> <b>Powder</b> <input type="checkbox"/><br>Suspended in <u>Pure water</u><br>pH <u>n.d.</u><br>stabilizer <u>none</u> |                                                                         |                                                                                                                                  |                                           |
| Property                                                                                                                  |                                                | unit                                                                                                                                                                       | Method / Institute                                                      |                                                                                                                                  | Value                                     |
| Agglomeration/aggregation                                                                                                 |                                                |                                                                                                                                                                            | HRTEM (KIT)                                                             |                                                                                                                                  | Agglomerated                              |
| Crystalline phase                                                                                                         |                                                |                                                                                                                                                                            | D5000 Diffractometer (UU)<br>PANalytical X'Pert diffractometer (ICN)    |                                                                                                                                  | Amorphous                                 |
| Crystallite size                                                                                                          |                                                |                                                                                                                                                                            | HRTEM (KIT)                                                             |                                                                                                                                  | n.a.                                      |
| Octanol-water partition coefficient                                                                                       |                                                |                                                                                                                                                                            | Extraction/ ICP-MS (ICN)                                                |                                                                                                                                  | n.a.                                      |
| Photocatalytic activity                                                                                                   |                                                |                                                                                                                                                                            | Rhodamin-B Bleaching/UV-B-100<br>10mg/ml in Water (ICN)                 |                                                                                                                                  | none                                      |
| Porosity                                                                                                                  |                                                | -/- or %                                                                                                                                                                   | n.a.                                                                    |                                                                                                                                  | n.a.                                      |
| Pour density                                                                                                              |                                                | cm <sup>3</sup> /g                                                                                                                                                         | (BJH) Pore Size Distribution and<br>Volume by ASAP2020 (UU)             |                                                                                                                                  | n.a.                                      |
| Size distribution:<br>(suspension in<br>water)                                                                            | Modal value X <sub>M</sub> (PDI)               | nm                                                                                                                                                                         | Zetasizer Nano ZS /UCD<br>DCS (UCD) (RWtAv / RNumAv)                    |                                                                                                                                  | 67.2 (PDI:0.131)<br>NM: 42.5<br>47.1/43.8 |
|                                                                                                                           | Total concentration                            | mg/ml                                                                                                                                                                      |                                                                         |                                                                                                                                  | 1mg/ml                                    |
| Size distribution:<br>(Aerosol)                                                                                           | Modal value X <sub>M</sub> (σ <sub>geo</sub> ) | nm                                                                                                                                                                         | SMPS TSI, DMA 3071 with CPC<br>3022A / KIT<br>dispersed by electrospray |                                                                                                                                  | 53.0                                      |
|                                                                                                                           | Total concentration                            | mg/cm <sup>3</sup> or #/cm <sup>3</sup>                                                                                                                                    |                                                                         |                                                                                                                                  | 3.62x 10 <sup>4</sup> /cm <sup>3</sup>    |
| Solubility in _____                                                                                                       |                                                | g/l                                                                                                                                                                        |                                                                         |                                                                                                                                  |                                           |
| Solubility in H <sub>2</sub> O                                                                                            |                                                | g/l                                                                                                                                                                        | Extraction/ ICP-MS (ICN)                                                |                                                                                                                                  | 109.0 g/L                                 |
| Specific surface area                                                                                                     |                                                | cm <sup>2</sup> /g                                                                                                                                                         | BET by ASAP2020 (UU)                                                    |                                                                                                                                  | n.a.                                      |
| Surface chemistry                                                                                                         |                                                |                                                                                                                                                                            |                                                                         |                                                                                                                                  |                                           |
| Zeta potential (surface charge)                                                                                           |                                                | eV                                                                                                                                                                         | Zetasizer Nano ZS /UU                                                   |                                                                                                                                  | -66.2mV<br>(pH 8.80)                      |
| Summary of trace analyses                                                                                                 |                                                |                                                                                                                                                                            | ICP-MS (KIT)                                                            |                                                                                                                                  |                                           |
| B                                                                                                                         |                                                | µg/g                                                                                                                                                                       |                                                                         |                                                                                                                                  | 4.7                                       |
| Na                                                                                                                        |                                                | µg/g                                                                                                                                                                       |                                                                         |                                                                                                                                  | 21                                        |
| Mg                                                                                                                        |                                                | µg/g                                                                                                                                                                       |                                                                         |                                                                                                                                  | 4.4                                       |
| Al                                                                                                                        |                                                | µg/g                                                                                                                                                                       |                                                                         |                                                                                                                                  | 6.1                                       |
| K                                                                                                                         |                                                | µg/g                                                                                                                                                                       |                                                                         |                                                                                                                                  | 13                                        |
| Ca                                                                                                                        |                                                | µg/g                                                                                                                                                                       |                                                                         |                                                                                                                                  | 67                                        |
| Fe                                                                                                                        |                                                | µg/g                                                                                                                                                                       |                                                                         |                                                                                                                                  | 2.7                                       |
| Cu                                                                                                                        |                                                | µg/g                                                                                                                                                                       |                                                                         |                                                                                                                                  | 3.9                                       |

|                                                                                                                                                                                                                                                                                                                                                                                                                                                                                                                                                                                                                                                                                                                                                                                                                                                                                                                                                                                                                                                                                                                                                                                                                                                                                                                                                                                                                                                                                                                                                                                                                                                                                                                                                                                                                                                                                                                                                                                                                                                                                                                                                                                                                                                                                                                                                                                                                                                                                                                                                                                                                                                                                                                                                                                                                                                                                                                                                                                                                                                                                                                                                                                                                                                                                                                                                                                                                                                                                                                                                                                                                                                                                                                                                                                                                                                                                                                                                                                                                                                                                                                                                                                                                                                                                                                                                                                                                                                                                                                                                                                                                                                                                                                                                                                                                                                                                                                                                                                                                                                                                                                                                                                                                                                                                                                                                                                                                                                                                                                                                                                                                                                                                                                                                                                                                                                                                                                                                                                                                                                                                                                                                                                                                                                                                                                                                                                                                                                                                                                                                                                                                                                                                                                                                                                                                                                                                                                                                                                                                                                                                                                                                                                                                                                                                                                                                                                                                                                                                                                                                                                                                                                                                                                                                                                                                                                                                                                                                                                                                                                                                                                                                                                                                                                                                                                                                                                                                                                                                                                                                                                                                                                                                                                                                                                                                                                                                                                                                                                                                                                                                                                                                                                                                                                                                                                                                                                                                                                                                                                                                                                                                                                                                                                                                                                                                                                                                                                                                                                                                                                                                                                                                                       |      |  |     |
|-----------------------------------------------------------------------------------------------------------------------------------------------------------------------------------------------------------------------------------------------------------------------------------------------------------------------------------------------------------------------------------------------------------------------------------------------------------------------------------------------------------------------------------------------------------------------------------------------------------------------------------------------------------------------------------------------------------------------------------------------------------------------------------------------------------------------------------------------------------------------------------------------------------------------------------------------------------------------------------------------------------------------------------------------------------------------------------------------------------------------------------------------------------------------------------------------------------------------------------------------------------------------------------------------------------------------------------------------------------------------------------------------------------------------------------------------------------------------------------------------------------------------------------------------------------------------------------------------------------------------------------------------------------------------------------------------------------------------------------------------------------------------------------------------------------------------------------------------------------------------------------------------------------------------------------------------------------------------------------------------------------------------------------------------------------------------------------------------------------------------------------------------------------------------------------------------------------------------------------------------------------------------------------------------------------------------------------------------------------------------------------------------------------------------------------------------------------------------------------------------------------------------------------------------------------------------------------------------------------------------------------------------------------------------------------------------------------------------------------------------------------------------------------------------------------------------------------------------------------------------------------------------------------------------------------------------------------------------------------------------------------------------------------------------------------------------------------------------------------------------------------------------------------------------------------------------------------------------------------------------------------------------------------------------------------------------------------------------------------------------------------------------------------------------------------------------------------------------------------------------------------------------------------------------------------------------------------------------------------------------------------------------------------------------------------------------------------------------------------------------------------------------------------------------------------------------------------------------------------------------------------------------------------------------------------------------------------------------------------------------------------------------------------------------------------------------------------------------------------------------------------------------------------------------------------------------------------------------------------------------------------------------------------------------------------------------------------------------------------------------------------------------------------------------------------------------------------------------------------------------------------------------------------------------------------------------------------------------------------------------------------------------------------------------------------------------------------------------------------------------------------------------------------------------------------------------------------------------------------------------------------------------------------------------------------------------------------------------------------------------------------------------------------------------------------------------------------------------------------------------------------------------------------------------------------------------------------------------------------------------------------------------------------------------------------------------------------------------------------------------------------------------------------------------------------------------------------------------------------------------------------------------------------------------------------------------------------------------------------------------------------------------------------------------------------------------------------------------------------------------------------------------------------------------------------------------------------------------------------------------------------------------------------------------------------------------------------------------------------------------------------------------------------------------------------------------------------------------------------------------------------------------------------------------------------------------------------------------------------------------------------------------------------------------------------------------------------------------------------------------------------------------------------------------------------------------------------------------------------------------------------------------------------------------------------------------------------------------------------------------------------------------------------------------------------------------------------------------------------------------------------------------------------------------------------------------------------------------------------------------------------------------------------------------------------------------------------------------------------------------------------------------------------------------------------------------------------------------------------------------------------------------------------------------------------------------------------------------------------------------------------------------------------------------------------------------------------------------------------------------------------------------------------------------------------------------------------------------------------------------------------------------------------------------------------------------------------------------------------------------------------------------------------------------------------------------------------------------------------------------------------------------------------------------------------------------------------------------------------------------------------------------------------------------------------------------------------------------------------------------------------------------------------------------------------------------------------------------------------------------------------------------------------------------------------------------------------------------------------------------------------------------------------------------------------------------------------------------------------------------------------------------------------------------------------------------------------------------------------------------------------------------------------------------------------------------------------------------------------------------------------------------------------------------------------------------------------------------------------------------------------------------------------------------------------------------------------------------------------------------------------------------------------------------------------------------------------------------------------------------------------------------------------------------------------------------------------------------------------------------------------------------------------------------------------------------------------------------------------------------------------------------------------------------------------------------------------------------------------------------------------------------------------------------------------------------------------------------------------------------------------------------------------------------------------------------------------------------------------------------------------------------------------------------------------------------------------------------------------------------------------------------------------------------------------------------------------------------------------------------------------------------------------------------------------------------------------------------------------------------------------------------------------------------------------------------------------------------------------------------------------------------------------------------|------|--|-----|
| Zn                                                                                                                                                                                                                                                                                                                                                                                                                                                                                                                                                                                                                                                                                                                                                                                                                                                                                                                                                                                                                                                                                                                                                                                                                                                                                                                                                                                                                                                                                                                                                                                                                                                                                                                                                                                                                                                                                                                                                                                                                                                                                                                                                                                                                                                                                                                                                                                                                                                                                                                                                                                                                                                                                                                                                                                                                                                                                                                                                                                                                                                                                                                                                                                                                                                                                                                                                                                                                                                                                                                                                                                                                                                                                                                                                                                                                                                                                                                                                                                                                                                                                                                                                                                                                                                                                                                                                                                                                                                                                                                                                                                                                                                                                                                                                                                                                                                                                                                                                                                                                                                                                                                                                                                                                                                                                                                                                                                                                                                                                                                                                                                                                                                                                                                                                                                                                                                                                                                                                                                                                                                                                                                                                                                                                                                                                                                                                                                                                                                                                                                                                                                                                                                                                                                                                                                                                                                                                                                                                                                                                                                                                                                                                                                                                                                                                                                                                                                                                                                                                                                                                                                                                                                                                                                                                                                                                                                                                                                                                                                                                                                                                                                                                                                                                                                                                                                                                                                                                                                                                                                                                                                                                                                                                                                                                                                                                                                                                                                                                                                                                                                                                                                                                                                                                                                                                                                                                                                                                                                                                                                                                                                                                                                                                                                                                                                                                                                                                                                                                                                                                                                                                                                                                                    | µg/g |  | 3.4 |
| Ba                                                                                                                                                                                                                                                                                                                                                                                                                                                                                                                                                                                                                                                                                                                                                                                                                                                                                                                                                                                                                                                                                                                                                                                                                                                                                                                                                                                                                                                                                                                                                                                                                                                                                                                                                                                                                                                                                                                                                                                                                                                                                                                                                                                                                                                                                                                                                                                                                                                                                                                                                                                                                                                                                                                                                                                                                                                                                                                                                                                                                                                                                                                                                                                                                                                                                                                                                                                                                                                                                                                                                                                                                                                                                                                                                                                                                                                                                                                                                                                                                                                                                                                                                                                                                                                                                                                                                                                                                                                                                                                                                                                                                                                                                                                                                                                                                                                                                                                                                                                                                                                                                                                                                                                                                                                                                                                                                                                                                                                                                                                                                                                                                                                                                                                                                                                                                                                                                                                                                                                                                                                                                                                                                                                                                                                                                                                                                                                                                                                                                                                                                                                                                                                                                                                                                                                                                                                                                                                                                                                                                                                                                                                                                                                                                                                                                                                                                                                                                                                                                                                                                                                                                                                                                                                                                                                                                                                                                                                                                                                                                                                                                                                                                                                                                                                                                                                                                                                                                                                                                                                                                                                                                                                                                                                                                                                                                                                                                                                                                                                                                                                                                                                                                                                                                                                                                                                                                                                                                                                                                                                                                                                                                                                                                                                                                                                                                                                                                                                                                                                                                                                                                                                                                                    | µg/g |  | 4.3 |
| <b>Electron microscopy</b><br>Method / technical data of microscope:<br>SOP: See KIT (LEM)<br><br>Magnification: 450.000<br><br><br><br><br><br><br><br><br><br><br><br><br><br><br><br><br><br><br><br><br><br><br><br><br><br><br><br><br><br><br><br><br><br><br><br><br><br><br><br><br><br><br><br><br><br><br><br><br><br><br><br><br><br><br><br><br><br><br><br><br><br><br><br><br><br><br><br><br><br><br><br><br><br><br><br><br><br><br><br><br><br><br><br><br><br><br><br><br><br><br><br><br><br><br><br><br><br><br><br><br><br><br><br><br><br><br><br><br><br><br><br><br><br><br><br><br><br><br><br><br><br><br><br><br><br><br><br><br><br><br><br><br><br><br><br><br><br><br><br><br><br><br><br><br><br><br><br><br><br><br><br><br><br><br><br><br><br><br><br><br><br><br><br><br><br><br><br><br><br><br><br><br><br><br><br><br><br><br><br><br><br><br><br><br><br><br><br><br><br><br><br><br><br><br><br><br><br><br><br><br><br><br><br><br><br><br><br><br><br><br><br><br><br><br><br><br><br><br><br><br><br><br><br><br><br><br><br><br><br><br><br><br><br><br><br><br><br><br><br><br><br><br><br><br><br><br><br><br><br><br><br><br><br><br><br><br><br><br><br><br><br><br><br><br><br><br><br><br><br><br><br><br><br><br><br><br><br><br><br><br><br><br><br><br><br><br><br><br><br><br><br><br><br><br><br><br><br><br><br><br><br><br><br><br><br><br><br><br><br><br><br><br><br><br><br><br><br><br><br><br><br><br><br><br><br><br><br><br><br><br><br><br><br><br><br><br><br><br><br><br><br><br><br><br><br><br><br><br><br><br><br><br><br><br><br><br><br><br><br><br><br><br><br><br><br><br><br><br><br><br><br><br><br><br><br><br><br><br><br><br><br><br><br><br><br><br><br><br><br><br><br><br><br><br><br><br><br><br><br><br><br><br><br><br><br><br><br><br><br><br><br><br><br><br><br><br><br><br><br><br><br><br><br><br><br><br><br><br><br><br><br><br><br><br><br><br><br><br><br><br><br><br><br><br><br><br><br><br><br><br><br><br><br><br><br><br><br><br><br><br><br><br><br><br><br><br><br><br><br><br><br><br><br><br><br><br><br><br><br><br><br><br><br><br><br><br><br><br><br><br><br><br><br><br><br><br><br><br><br><br><br><br><br><br><br><br><br><br><br><br><br><br><br><br><br><br><br><br><br><br><br><br><br><br><br><br><br><br><br><br><br><br><br><br><br><br><br><br><br><br><br><br><br><br><br><br><br><br><br><br><br><br><br><br><br><br><br><br><br><br><br><br><br><br><br><br><br><br><br><br><br><br><br><br><br><br><br><br><br><br><br><br><br><br><br><br><br><br><br><br><br><br><br><br><br><br><br><br><br><br><br><br><br><br><br><br><br><br><br><br><br><br><br><br><br><br><br><br><br><br><br><br><br><br><br><br><br><br><br><br><br><br><br><br><br><br><br><br><br><br><br><br><br><br><br><br><br><br><br><br><br><br><br><br><br><br><br><br><br><br><br><br><br><br><br><br><br><br><br><br><br><br><br><br><br><br><br><br><br><br><br><br><br><br><br><br><br><br><br><br><br><br><br><br><br><br><br><br><br><br><br><br><br><br><br><br><br><br><br><br><br><br><br><br><br><br><br><br><br><br><br><br><br><br><br><br><br><br><br><br><br><br><br><br><br><br><br><br><br><br><br><br><br><br><br><br><br><br><br><br><br><br><br><br><br><br><br><br><br><br><br><br><br><br><br><br><br><br><br><br><br><br><br><br><br><br><br><br><br><br><br><br><br><br><br><br><br><br><br><br><br><br><br><br><br><br><br><br><br><br><br><br><br><br><br><br><br><br><br><br><br><br><br><br><br><br><br><br><br><br><br><br><br><br><br><br><br><br><br><br><br><br><br><br><br><br><br><br><br><br><br><br><br><br><br><br><br><br><br><br><br><br><br><br><br><br><br><br><br><br><br><br><br><br><br><br><br><br><br><br><br><br><br><br><br><br><br><br><br><br><br><br><br><br><br><br><br><br><br><br><br><br><br><br><br><br><br><br><br><br><br><br><br><br><br><br><br><br><br><br><br><br><br><br><br><br><br><br><br><br><br><br><br><br><br><br><br><br><br><br><br><br><br><br><br><br><br><br><br><br><br><br><br><br><br><br><br><br><br><br><br><br><br><br><br><br><br><br><br><br><br><br><br><br><br><br><br><br><br><br><br><br><br><br><br><br><br><br><br><br><br><br><br><br><br><br><br><br><br><br><br><br><br><br><br><br><br><br><br><br><br><br><br><br><br><br><br><br><br><br><br><br><br><br><br><br><br><br><br><br><br><br><br><br><br><br><br><br><br><br><br><br><br><br><br><br><br><br><br><br><br><br><br><br><br><br><br><br><br><br><br><br><br><br><br><br><br><br><br><br><br><br><br><br><br><br><br><br><br><br><br><br><br><br><br><br><br><br><br><br><br><br><br><br><br><br><br><br><br><br><br><br><br><br><br><br><br><br><br><br><br><br><br><br><br><br><br><br><br><br><br><br><br><br><br><br><br><br><br><br><br><br><br><br><br><br><br><br><br><br><br><br><br><br><br><br><br><br><br><br><br><br><br><br><br><br><br><br><br><br><br><br><br><br><br><br><br><br><br><br><br><br><br><br><br><br><br><br><br><br><br><br><br><br><br><br><br><br><br><br><br><br><br><br><br><br><br><br><br><br><br><br><br><br><br><br><br><br><br><br><br><br><br><br><br><br><br><br><br><br><br><br><br><br><br><br><br><br><br><br><br><br><br><br><br><br><br><br><br><br><br><br><br><br><br><br><br><br><br><br><br><br><br><br><br><br><br><br><br><br><br><br><br><br><br><br><br><br><br><br><br><br><br><br><br><br><br><br><br><br><br><br><br><br><br><br><br><br><br><br><br><br><br><br><br><br><br><br><br><br><br><br><br><br><br><br><br><br><br><br><br><br><br><br><br><br><br><br><br><br><br><br><br><br><br><br><br><br><br><br><br><br><br><br><br><br><br><br><br><br><br><br><br><br><br><br><br><br><br><br><br><br><br><br><br><br><br><br><br><br><br><br><br><br><br><br><br><br><br><br><br><br><br><br><br><br><br><br><br><br><br><br><br><br><br><br><br><br><br><br><br><br><br><br><br><br><br><br><br><br><br><br><br><br><br><br><br><br><br><br><br><br><br><br><br><br><br><br><br><br><br><br><br><br><br><br><br><br><br><br><br><br><br><br><br><br><br><br><br><br><br><br><br><br><br><br><br><br><br><br><br><br><br><br><br><br><br><br><br><br><br><br><br><br><br><br><br><br><br><br><br><br><br><br><br><br><br><br><br><br><br><br><br><br><br><br><br><br><br><br><br><br><br><br><br><br><br><br><br><br><br><br><br><br><br><br><br><br><br><br><br><br><br><br><br><br><br><br><br><br><br><br><br><br><br><br><br><br><br><br><br><br><br><br><br><br><br><br><br><br><br><br><br><br><br><br><br><br><br><br><br><br><br><br><br><br><br><br><br><br><br><br><br><br><br><br><br><br><br><br><br><br><br><br><br><br><br><br><br><br><br><br><br><br><br><br><br><br><br><br><br><br><br><br><br><br><br><br><br><br><br><br><br><br><br><br><br><br><br><br><br><br><br><br><br><br><br><br><br><br><br><br><br><br><br><br><br><br><br><br><br><br><br><br><br><br><br><br><br><br><br><br><br><br><br><br><br><br><br><br><br><br><br><br><br><br><br><br><br><br><br><br><br><br><br><br><br><br><br><br><br><br><br><br><br><br><br><br><br><br><br><br><br><br><br><br><br><br><br><br><br><br><br><br><br><br><br><br><br><br><br><br><br><br><br><br><br><br><br><br><br><br><br><br><br><br><br><br><br><br><br><br><br><br><br><br><br><br><br><br><br><br><br><br><br><br><br><br><br><br><br><br><br><br><br><br><br><br><br><br><br><br><br><br><br><br><br><br><br><br><br><br><br><br><br><br><br><br><br><br><br><br><br><br><br><br><br><br><br><br><br><br><br><br><br><br><br><br><br><br><br><br><br><br><br><br><br><br><br><br><br><br><br><br><br><br><br><br><br><br><br><br><br><br><br><br><br><br><br><br><br><br><br><br><br><br><br><br><br><br><br><br><br><br><br><br><br><br><br><br><br><br><br><br><br><br><br><br><br><br><br><br><br><br><br><br><br><br><br><br><br><br><br><br><br><br><br><br><br><br><br><br><br><br><br><br><br><br><br><br><br><br><br><br><br><br><br><br><br><br><br><br><br><br><br><br><br><br><br><br><br><br><br><br><br><br><br><br><br><br><br><br><br><br><br><br><br><br><br><br><br><br><br><br><br><br><br><br><br><br><br><br><br><br><br><br><br><br><br><br><br><br><br><br><br><br><br><br><br><br><br><br><br><br><br><br><br><br><br><br><br><br><br><br><br><br><br><br><br><br><br><br><br><br><br><br><br><br><br><br><br><br><br><br><br><br><br><br><br><br><br><br><br><br><br><br><br><br><br><br><br><br><br><br><br><br><br><br><br><br><br><br><br><br><br><br><br><br><br><br><br><br><br><br><br><br><br><br><br><br><br><br><br><br><br><br><br><br><br><br><br><br><br><br><br><br><br><br><br><br><br><br><br><br><br><br><br><br><br><br><br><br><br><br><br><br><br><br><br><br><br><br><br><br><br><br><br><br><br><br><br><br><br><br><br><br><br><br><br><br><br><br><br><br><br><br><br><br><br><br><br><br><br><br><br><br><br><br><br><br><br><br><br><br><br><br><br><br><br><br><br><br><br><br><br><br><br><br><br><br><br><br><br><br><br><br><br><br><br><br><br><br><br><br><br><br><br><br><br><br><br><br><br><br><br><br><br><br><br><br><br><br><br><br><br><br><br><br><br><br><br><br><br><br><br><br><br><br><br><br><br><br><br><br><br><br><br><br><br><br><br><br><br><br><br><br><br><br><br><br><br><br><br><br><br><br><br><br><br><br><br><br><br><br><br><br><br><br><br><br><br><br><br><br><br><br><br><br><br><br><br><br><br><br><br><br><br><br><br><br><br><br><br><br><br><br><br><br><br><br><br><br><br><br><br><br><br><br><br><br><br><br><br><br><br><br><br><br><br><br><br><br><br><br><br><br><br><br><br><br><br><br><br><br><br><br><br><br><br><br><br><br><br><br><br><br><br><br><br><br><br><br><br><br><br><br><br><br><br><br><br><br><br><br><br><br><br><br><br><br><br><br><br><br><br><br><br><br><br><br><br><br><br><br><br><br><br><br><br><br><br><br><br><br><br><br><br><br><br><br><br><br><br><br><br><br><br><br><br><br><br><br><br><br><br><br><br><br><br><br><br><br><br><br><br><br><br><br><br><br><br><br><br><br><br><br><br><br><br><br><br><br><br><br><br><br><br><br><br><br><br><br><br><br><br><br><br><br><br><br><br><br><br><br><br><br><br><br><br><br>< |      |  |     |

| <b>REPRESENTATIVE TEST PARTICLES</b><br>Nanomaterial Identification<br>according to OECD<br>ENV/JM/MONO(2009)20/REV pp29. |                                                |                                                                                                                                                                            |  Research Infrastructure<br><b>QualityNano</b> |                                            |
|---------------------------------------------------------------------------------------------------------------------------|------------------------------------------------|----------------------------------------------------------------------------------------------------------------------------------------------------------------------------|----------------------------------------------------------------------------------------------------------------------------------|--------------------------------------------|
| Nanomaterial name                      Silica-NP<br>Particle Code                              SilNP_008                  |                                                | <b>Manufacturer /Institute/Date</b><br>Eugene Mahon ; provided by UCD; 10/2011<br><b>Technology Expert:</b> Eugene Mahon                                                   |                                                                                                                                  |                                            |
| Composition                                SiO <sub>2</sub><br>Method of production                      Stöber-Synthesis |                                                |                                                                                                                                                                            |                                                                                                                                  |                                            |
| <b>Kind of suspension:</b>                                                                                                |                                                | <b>Suspension</b> <input checked="" type="checkbox"/> <b>Powder</b> <input type="checkbox"/><br>Suspended in <u>Pure water</u><br>pH <u>n.d.</u><br>stabilizer <u>none</u> |                                                                                                                                  |                                            |
| Property                                                                                                                  | unit                                           | Method / Institute                                                                                                                                                         | Value                                                                                                                            |                                            |
| Agglomeration/aggregation                                                                                                 |                                                | HRTEM (KIT)                                                                                                                                                                | Agglomerated                                                                                                                     |                                            |
| Crystalline phase                                                                                                         |                                                | D5000 Diffractometer (UU)<br>PANalytical X'Pert diffractometer (ICN)                                                                                                       | Amorphous                                                                                                                        |                                            |
| Crystallite size                                                                                                          |                                                | HRTEM (KIT)                                                                                                                                                                | n.a.                                                                                                                             |                                            |
| Octanol-water partition coefficient                                                                                       |                                                | Extraction/ ICP-MS (ICN)                                                                                                                                                   | n.a.                                                                                                                             |                                            |
| Photocatalytic activity                                                                                                   |                                                | Rhodamin-B Bleaching/UV-B-100<br>10mg/ml in Water (ICN)                                                                                                                    | none                                                                                                                             |                                            |
| Porosity                                                                                                                  | -/- or %                                       | n.a.                                                                                                                                                                       | n.a                                                                                                                              |                                            |
| Pour density                                                                                                              | cm <sup>3</sup> /g                             | (BJH) Pore Size Distribution and<br>Volume by ASAP2020 (UU)                                                                                                                | n.a                                                                                                                              |                                            |
| Size distribution:<br>(suspension in water)                                                                               | Modal value X <sub>M</sub> (PDI)               | nm                                                                                                                                                                         | Zetasizer Nano ZS /UCD<br>DCS (UCD) (RWtAv / RNumAv)                                                                             | 36.5 (PDI: 0.175)<br>NM: 19.9<br>23.2/22.6 |
|                                                                                                                           | Total concentration                            | mg/ml                                                                                                                                                                      |                                                                                                                                  | 1mg/ml                                     |
| Size distribution:<br>(Aerosol)                                                                                           | Modal value X <sub>M</sub> (σ <sub>geo</sub> ) | nm                                                                                                                                                                         | SMPS TSI, DMA 3071 with CPC<br>3022A / KIT<br>dispersed by electrospray                                                          | 33 (σ <sub>geo</sub> =1.17)                |
|                                                                                                                           | Total concentration                            | mg/cm <sup>3</sup> or #/cm <sup>3</sup>                                                                                                                                    |                                                                                                                                  | 8.3x 10 <sup>4</sup> /cm <sup>3</sup>      |
| Solubility in _____                                                                                                       | g/l                                            |                                                                                                                                                                            |                                                                                                                                  |                                            |
| Solubility in H <sub>2</sub> O                                                                                            | g/l                                            | Extraction/ ICP-MS (ICN)                                                                                                                                                   | 62.37 g/L                                                                                                                        |                                            |
| Specific surface area                                                                                                     | cm <sup>2</sup> /g                             | BET by ASAP2020 (UU)                                                                                                                                                       | n.a.                                                                                                                             |                                            |
| Surface chemistry                                                                                                         |                                                |                                                                                                                                                                            |                                                                                                                                  |                                            |
| Zeta potential (surface charge)                                                                                           | eV                                             | Zetasizer Nano ZS /UU                                                                                                                                                      | -38.0mV<br>(pH 7.78)                                                                                                             |                                            |
| Summary of trace analyses                                                                                                 |                                                | ICP-MS (KIT)                                                                                                                                                               |                                                                                                                                  |                                            |
| B                                                                                                                         | µg/g                                           |                                                                                                                                                                            | 4.9                                                                                                                              |                                            |
| Na                                                                                                                        | µg/g                                           |                                                                                                                                                                            | 35                                                                                                                               |                                            |
| Mg                                                                                                                        | µg/g                                           |                                                                                                                                                                            | 2.1                                                                                                                              |                                            |
| Al                                                                                                                        | µg/g                                           |                                                                                                                                                                            | 2.1                                                                                                                              |                                            |
| K                                                                                                                         | µg/g                                           |                                                                                                                                                                            | 30                                                                                                                               |                                            |
| Ca                                                                                                                        | µg/g                                           |                                                                                                                                                                            | 56                                                                                                                               |                                            |
| Fe                                                                                                                        | µg/g                                           |                                                                                                                                                                            | 2.1                                                                                                                              |                                            |
| Cu                                                                                                                        | µg/g                                           |                                                                                                                                                                            | 2.1                                                                                                                              |                                            |

|                                                                                                                          |                                                                                                                                                                                                                                                                                                                                                                                                                                                                                                                                                                                                                                                                                                                                                                                                               |                                    |     |
|--------------------------------------------------------------------------------------------------------------------------|---------------------------------------------------------------------------------------------------------------------------------------------------------------------------------------------------------------------------------------------------------------------------------------------------------------------------------------------------------------------------------------------------------------------------------------------------------------------------------------------------------------------------------------------------------------------------------------------------------------------------------------------------------------------------------------------------------------------------------------------------------------------------------------------------------------|------------------------------------|-----|
| Zn                                                                                                                       | µg/g                                                                                                                                                                                                                                                                                                                                                                                                                                                                                                                                                                                                                                                                                                                                                                                                          |                                    | 1.7 |
| Ba                                                                                                                       | µg/g                                                                                                                                                                                                                                                                                                                                                                                                                                                                                                                                                                                                                                                                                                                                                                                                          |                                    | 4   |
| <b>Electron microscopy</b><br>Method / technical data of microscope:<br>SOP: See KIT (LEM)<br><br>Magnification: 450.000 | <div><div><p>SiINP_008</p></div><div><ul style="list-style-type: none"><li>■ The particles are very small, mean size is approximately 16 nm</li><li>■ The size distribution is extremely narrow</li></ul></div><div></div><div>Electron Microscopy by KIT (LEM)</div><div></div><div>Electron Microscopy by UCD</div><div>Av. Diameter (ImageJ) = 26.6(5.16) nm</div></div> |                                    |     |
| Radical formation potential by DCF-Test:<br>(H <sub>2</sub> O <sub>2</sub> as positive control) (KIT)                    | <div></div> <div>Result: SiINP_008 NPs induced a significant DCFH oxidation at high concentrations indicating a potential to produce reactive oxygen species.</div>                                                                                                                                                                                                                                                                                                                                                                                                                                                                                                                                                       |                                    |     |
| <b>Comments and other relevant physical-chemical properties and material characterization information</b>                |                                                                                                                                                                                                                                                                                                                                                                                                                                                                                                                                                                                                                                                                                                                                                                                                               |                                    |     |
| <b>Place, Date</b> Karlsruhe, 29.11.2016                                                                                 |                                                                                                                                                                                                                                                                                                                                                                                                                                                                                                                                                                                                                                                                                                                                                                                                               | <b>Responsible</b> H.-R. Paur, KIT |     |

| <b>REPRESENTATIVE TEST PARTICLES</b><br>Nanomaterial Identification<br>according to OECD<br>ENV/JM/MONO(2009)20/REV pp29. |                                                |                                                                                                                                                                            |                                                                         |  Research Infrastructure<br><b>QualityNano</b> |                                          |
|---------------------------------------------------------------------------------------------------------------------------|------------------------------------------------|----------------------------------------------------------------------------------------------------------------------------------------------------------------------------|-------------------------------------------------------------------------|----------------------------------------------------------------------------------------------------------------------------------|------------------------------------------|
| Nanomaterial name                      Silica-NP<br>Particle Code                              SilNP_009                  |                                                | <b>Manufacturer /Institute/Date</b><br><b>Eugene Mahon ; provided by UCD; 10/2011</b><br><b>Technology Expert:</b> Eugene Mahon                                            |                                                                         |                                                                                                                                  |                                          |
| Composition                              SiO <sub>2</sub><br>Method of production                      Stöber-Synthesis   |                                                |                                                                                                                                                                            |                                                                         |                                                                                                                                  |                                          |
| <b>Kind of suspension:</b>                                                                                                |                                                | <b>Suspension</b> <input checked="" type="checkbox"/> <b>Powder</b> <input type="checkbox"/><br>Suspended in <u>Pure water</u><br>pH <u>n.d.</u><br>stabilizer <u>none</u> |                                                                         |                                                                                                                                  |                                          |
| Property                                                                                                                  |                                                | unit                                                                                                                                                                       | Method / Institute                                                      |                                                                                                                                  | Value                                    |
| Agglomeration/aggregation                                                                                                 |                                                |                                                                                                                                                                            | HRTEM (KIT)                                                             |                                                                                                                                  | Agglomerated                             |
| Crystalline phase                                                                                                         |                                                |                                                                                                                                                                            | D5000 Diffractometer /UU<br>PANalytical X'Pert diffractometer /ICN      |                                                                                                                                  | Amorphous                                |
| Crystallite size                                                                                                          |                                                |                                                                                                                                                                            | HRTEM (KIT)                                                             |                                                                                                                                  | n.a.                                     |
| Octanol-water partition coefficient                                                                                       |                                                |                                                                                                                                                                            | Extraction/ ICP-MS (ICN)                                                |                                                                                                                                  | n.a.                                     |
| Photocatalytic activity                                                                                                   |                                                |                                                                                                                                                                            | Rhodamin-B Bleaching/UV-B-100<br>10mg/ml in Water (ICN)                 |                                                                                                                                  | none                                     |
| Porosity                                                                                                                  |                                                | -/- or %                                                                                                                                                                   | n.a.                                                                    |                                                                                                                                  | n.a.                                     |
| Pour density                                                                                                              |                                                | cm <sup>3</sup> /g                                                                                                                                                         | (BJH) Pore Size Distribution and<br>Volume by ASAP2020 (UU)             |                                                                                                                                  | n.a.                                     |
| Size distribution:<br>(suspension in water)                                                                               | Modal value X <sub>M</sub> (PDI)               | nm                                                                                                                                                                         | Zetasizer Nano ZS /UCD<br>DCS (UCD) (RWtAv / RNumAv)                    |                                                                                                                                  | 61.3 (PDI:0.093)<br>NM: 43.7<br>43/ 40.7 |
|                                                                                                                           | Total concentration                            | mg/ml                                                                                                                                                                      |                                                                         |                                                                                                                                  | 1mg/ml                                   |
| Size distribution:<br>(Aerosol)                                                                                           | Modal value X <sub>M</sub> (σ <sub>geo</sub> ) | nm                                                                                                                                                                         | SMPS TSI, DMA 3071 with CPC<br>3022A / KIT<br>dispersed by electrospray |                                                                                                                                  | 50                                       |
|                                                                                                                           | Total concentration                            | mg/cm <sup>3</sup> or #/cm <sup>3</sup>                                                                                                                                    |                                                                         |                                                                                                                                  | 4.9x 10 <sup>4</sup> /cm <sup>3</sup>    |
| Solubility in _____                                                                                                       |                                                | g/l                                                                                                                                                                        |                                                                         |                                                                                                                                  |                                          |
| Solubility in H <sub>2</sub> O                                                                                            |                                                | g/l                                                                                                                                                                        | Extraction/ ICP-MS (ICN)                                                |                                                                                                                                  | 81.8 g/L                                 |
| Specific surface area                                                                                                     |                                                | cm <sup>2</sup> /g                                                                                                                                                         | BET by ASAP2020 (UU)                                                    |                                                                                                                                  | n.a.                                     |
| Surface chemistry                                                                                                         |                                                |                                                                                                                                                                            |                                                                         |                                                                                                                                  |                                          |
| Zeta potential (surface charge)                                                                                           |                                                | eV                                                                                                                                                                         | Zetasizer Nano ZS /UU                                                   |                                                                                                                                  | -51.7mV<br>(pH 8.72)                     |
| Summary of trace analyses                                                                                                 |                                                |                                                                                                                                                                            | ICP-MS (KIT)                                                            |                                                                                                                                  |                                          |
| B                                                                                                                         |                                                | µg/g                                                                                                                                                                       |                                                                         |                                                                                                                                  | 5.6                                      |
| Na                                                                                                                        |                                                | µg/g                                                                                                                                                                       |                                                                         |                                                                                                                                  | 54                                       |
| Mg                                                                                                                        |                                                | µg/g                                                                                                                                                                       |                                                                         |                                                                                                                                  | 1.9                                      |
| Al                                                                                                                        |                                                | µg/g                                                                                                                                                                       |                                                                         |                                                                                                                                  | 3.2                                      |
| K                                                                                                                         |                                                | µg/g                                                                                                                                                                       |                                                                         |                                                                                                                                  | 12                                       |
| Ca                                                                                                                        |                                                | µg/g                                                                                                                                                                       |                                                                         |                                                                                                                                  | 14                                       |
| Fe                                                                                                                        |                                                | µg/g                                                                                                                                                                       |                                                                         |                                                                                                                                  | 3.3                                      |
| Cu                                                                                                                        |                                                | µg/g                                                                                                                                                                       |                                                                         |                                                                                                                                  | 12.5                                     |
| Zn                                                                                                                        |                                                | µg/g                                                                                                                                                                       |                                                                         |                                                                                                                                  | 2.8                                      |
| Ba                                                                                                                        |                                                | µg/g                                                                                                                                                                       |                                                                         |                                                                                                                                  | 2.6                                      |

**Electron microscopy**

Method / technical data of microscope:  
SOP: See KIT (LEM)

Magnification: 450.000



- The maximum of the size distribution is at about 34 nm
- A relatively broad distribution (from about 20 nm to 50 nm) is observable



Electron Microscopy by KIT (LEM); Diameter : 30-50 nm

FEI Tecna i 120  
SOP: see UCD



Electron Microscopy by UCD

Av. Diameter (ImageJ) = 41.4 (4.52)nm

Radical formation potential by DCF-Test:  
(H<sub>2</sub>O<sub>2</sub> as positive control) (KIT)



Result: SiINP\_009 NPs induced a very low increase of DCFH oxidation at high concentrations indicating a negligible potential to produce reactive oxygen species.

**Comments and other relevant physical-chemical properties and material characterisation information**

**Place, Date** Karlsruhe, 29.11.2016

**Responsible** H.-R. Paur, KIT

| <b>REPRESENTATIVE TEST PARTICLES</b><br>Nanomaterial Identification<br>according to OECD<br>ENV/JM/MONO(2009)20/REV pp29. |                                                |                                                                                                                                                                            |  Research Infrastructure<br><b>QualityNano</b> |                                           |
|---------------------------------------------------------------------------------------------------------------------------|------------------------------------------------|----------------------------------------------------------------------------------------------------------------------------------------------------------------------------|----------------------------------------------------------------------------------------------------------------------------------|-------------------------------------------|
| Nanomaterial name                      Silica-NP<br>Particle Code                              SilNP_010                  |                                                | <b>Manufacturer /Institute/Date</b><br>Eugene Mahon ; provided by UCD; 10/2011<br><b>Technology Expert:</b> Eugene Mahon                                                   |                                                                                                                                  |                                           |
| Composition                              SiO <sub>2</sub><br>Method of production                      Stöber-Synthesis   |                                                |                                                                                                                                                                            |                                                                                                                                  |                                           |
| <b>Kind of suspension:</b>                                                                                                |                                                | <b>Suspension</b> <input checked="" type="checkbox"/> <b>Powder</b> <input type="checkbox"/><br>Suspended in <u>Pure water</u><br>pH <u>n.d.</u><br>stabilizer <u>none</u> |                                                                                                                                  |                                           |
| Property                                                                                                                  | unit                                           | Method / Institute                                                                                                                                                         | Value                                                                                                                            |                                           |
| Agglomeration/aggregation                                                                                                 |                                                | HRTEM (KIT)                                                                                                                                                                | Agglomerated                                                                                                                     |                                           |
| Crystalline phase                                                                                                         |                                                | D5000 Diffractometer (UU)<br>PANalytical X'Pert diffractometer (ICN)                                                                                                       | Amorphous                                                                                                                        |                                           |
| Crystallite size                                                                                                          |                                                | HRTEM (KIT)                                                                                                                                                                | n.a.                                                                                                                             |                                           |
| Octanol-water partition coefficient                                                                                       |                                                | Extraction/ ICP-MS (ICN)                                                                                                                                                   | n.a.                                                                                                                             |                                           |
| Photocatalytic activity                                                                                                   |                                                | Rhodamin-B Bleaching/UV-B-100<br>10mg/ml in Water (ICN)                                                                                                                    | none                                                                                                                             |                                           |
| Porosity                                                                                                                  | -/- or %                                       | n.a.                                                                                                                                                                       | n.a.                                                                                                                             |                                           |
| Pour density                                                                                                              | cm <sup>3</sup> /g                             | (BJH) Pore Size Distribution and<br>Volume by ASAP2020 (UU)                                                                                                                | n.a.                                                                                                                             |                                           |
| Size distribution:<br>(suspension in water)                                                                               | Modal value X <sub>M</sub> (PDI)               | nm                                                                                                                                                                         | Zetasizer Nano ZS /UCD<br>DCS (UCD) (RWtAv / RNumAv)                                                                             | 40.1 (PDI:0.174)<br>NM: 20.7<br>26.4/25.0 |
|                                                                                                                           | Total concentration                            | mg/ml                                                                                                                                                                      |                                                                                                                                  | 1mg/ml                                    |
| Size distribution:<br>(Aerosol)                                                                                           | Modal value X <sub>M</sub> (σ <sub>geo</sub> ) | nm                                                                                                                                                                         | SMPS TSI, DMA 3071 with CPC<br>3022A / KIT<br>dispersed by electrospray                                                          | 33 (σ <sub>geo</sub> =1.00)               |
|                                                                                                                           | Total concentration                            | mg/cm <sup>3</sup> or #/cm <sup>3</sup>                                                                                                                                    |                                                                                                                                  | 2.2x 10 <sup>5</sup> /cm <sup>3</sup>     |
| Solubility in _____                                                                                                       | g/l                                            |                                                                                                                                                                            |                                                                                                                                  |                                           |
| Solubility in H <sub>2</sub> O                                                                                            | g/l                                            | Extraction/ ICP-MS (ICN)                                                                                                                                                   | 117.4 g/L                                                                                                                        |                                           |
| Specific surface area                                                                                                     | cm <sup>2</sup> /g                             | BET by ASAP2020 (UU)                                                                                                                                                       | n.a.                                                                                                                             |                                           |
| Surface chemistry                                                                                                         |                                                |                                                                                                                                                                            |                                                                                                                                  |                                           |
| Zeta potential (surface charge)                                                                                           | eV                                             | Zetasizer Nano ZS /UU                                                                                                                                                      | -39.9mV<br>(pH 7.69)                                                                                                             |                                           |
| Summary of trace analyses                                                                                                 |                                                | ICP-MS (KIT)                                                                                                                                                               |                                                                                                                                  |                                           |
| B                                                                                                                         | µg/g                                           |                                                                                                                                                                            | 5.6                                                                                                                              |                                           |
| Na                                                                                                                        | µg/g                                           |                                                                                                                                                                            | 47                                                                                                                               |                                           |
| Mg                                                                                                                        | µg/g                                           |                                                                                                                                                                            | 2                                                                                                                                |                                           |
| Al                                                                                                                        | µg/g                                           |                                                                                                                                                                            | 2.                                                                                                                               |                                           |
| K                                                                                                                         | µg/g                                           |                                                                                                                                                                            | 12                                                                                                                               |                                           |
| Ca                                                                                                                        | µg/g                                           |                                                                                                                                                                            | 15                                                                                                                               |                                           |
| Fe                                                                                                                        | µg/g                                           |                                                                                                                                                                            | 1.7                                                                                                                              |                                           |
| Cu                                                                                                                        | µg/g                                           |                                                                                                                                                                            | 11.1                                                                                                                             |                                           |



Supplemental S3: Physicochemical characterization data sheets of silica NMs from flame synthesis

|                                                                                                                           |                                                |                                                                                                                                                                                                           |                                                    |
|---------------------------------------------------------------------------------------------------------------------------|------------------------------------------------|-----------------------------------------------------------------------------------------------------------------------------------------------------------------------------------------------------------|----------------------------------------------------|
| <b>REPRESENTATIVE TEST PARTICLES</b><br>Nanomaterial Identification<br>according to OECD<br>ENV/JM/MONO(2009)20/REV pp29. |                                                |                                                                                                                         |                                                    |
| Nanomaterial name      Aerosil®200<br>Particle Code              SiINP_001                                                |                                                | <b>Manufacturer /Institute:</b><br><b>DEGUSSA, provided by KIT – ITC</b><br><b>Name:</b> Sonja Mülhopt                                                                                                    |                                                    |
| Composition              SiO <sub>2</sub><br>Method of production      Flame synthesis                                    |                                                |                                                                                                                                                                                                           |                                                    |
| <b>Kind of suspension:</b>                                                                                                |                                                | <b>Suspension</b> <input type="checkbox"/> <b>Powder</b> <input checked="" type="checkbox"/><br>Suspended in      _____<br>pH                              _____<br>stabilizer                      _____ |                                                    |
| <b>Property</b>                                                                                                           | <b>unit</b>                                    | <b>Method (Institute)</b>                                                                                                                                                                                 | <b>Value</b>                                       |
| Agglomeration/aggregation                                                                                                 |                                                | HRTEM (KIT)                                                                                                                                                                                               | aggregated                                         |
| Crystalline phase                                                                                                         | n.a.                                           | D5000 (UU)<br>PANalytical X'Pert diffractometer                                                                                                                                                           | amorphous                                          |
| Crystallite size                                                                                                          |                                                | HRTEM (KIT)                                                                                                                                                                                               | n.a.                                               |
| Octanol-water partition coefficient                                                                                       |                                                | Extraction/ ICP-MS (ICN)                                                                                                                                                                                  | P <sub>OW</sub> =0                                 |
| Photocatalytic activity                                                                                                   |                                                | Rhodamin-B Bleaching/UV-B-100<br>10mg/ml in Water (ICN)                                                                                                                                                   | 80% / 2 min                                        |
| Porosity                                                                                                                  | cm <sup>3</sup> /g                             | (BJH) Pore Size Distribution and<br>Volume by ASAP2020 (UU)                                                                                                                                               | 0.43                                               |
| Pour density                                                                                                              | g/l                                            |                                                                                                                                                                                                           |                                                    |
|                                                                                                                           |                                                |                                                                                                                                                                                                           |                                                    |
| Redox potential                                                                                                           |                                                |                                                                                                                                                                                                           |                                                    |
| Size distribution<br>(suspension in<br>water)                                                                             | Modal value X <sub>M</sub> (PDI)               | nm                                                                                                                                                                                                        | Zetasizer Nano ZS (UCD)<br>(after 1h sonification) |
|                                                                                                                           | Total concentration                            | mg/ml                                                                                                                                                                                                     | 142.7<br>(PDI=0.145)                               |
| Size distribution<br>(aerosol)                                                                                            | Modal value X <sub>M</sub> (σ <sub>geo</sub> ) | nm                                                                                                                                                                                                        | 0.1 mg/ml                                          |
|                                                                                                                           | Total concentration                            | mg/cm <sup>3</sup> or #/cm <sup>3</sup>                                                                                                                                                                   | 127 (σ <sub>geo</sub> =1.4)                        |
| Solubility in _____                                                                                                       | g/l                                            |                                                                                                                                                                                                           | 2.0 x 10 <sup>4</sup> / cm <sup>3</sup>            |
| Solubility in H <sub>2</sub> O                                                                                            | g/l                                            | Extraction/ ICP-MS (ICN)                                                                                                                                                                                  |                                                    |
| Specific surface area                                                                                                     | m <sup>2</sup> /g                              | BET by ASAP2020 (UU)                                                                                                                                                                                      | 23.7±1.7                                           |
| Surface chemistry                                                                                                         |                                                |                                                                                                                                                                                                           | 196                                                |
| Zeta potential (surface charge)                                                                                           |                                                | Zetasizer Nano ZS (UU)                                                                                                                                                                                    | -22.8±0.8eV<br>(pH 5.00)                           |

|                                                                                                                                                                                   |                                                                                                                                                                                                                                                                                                                                                                                                                                 |                             |     |
|-----------------------------------------------------------------------------------------------------------------------------------------------------------------------------------|---------------------------------------------------------------------------------------------------------------------------------------------------------------------------------------------------------------------------------------------------------------------------------------------------------------------------------------------------------------------------------------------------------------------------------|-----------------------------|-----|
| Summary of trace analyses                                                                                                                                                         |                                                                                                                                                                                                                                                                                                                                                                                                                                 | ICP-MS (KIT)                |     |
| Ni                                                                                                                                                                                | µg/g                                                                                                                                                                                                                                                                                                                                                                                                                            |                             | 0.1 |
| Cu                                                                                                                                                                                | µg/g                                                                                                                                                                                                                                                                                                                                                                                                                            |                             | 0.2 |
| <b>Electron microscopy</b><br>Method / technical data of microscope:<br><br>See KIT-LEM<br><br>Magnification: _____<br><br><br><br><br><br><br><br>FEI Tecna i 120 (SOP: see UCD) | <p>Electron Microscopy by KIT (LEM)</p> <div></div> <p>Average Size of Primary Particles: 15 ± 10 nm</p> <p>Electron Microscopy by KIT (LEM)</p> <div></div> <p>Primary particle size looks to around 20 nm from 10 distance measurements using ImageJ.</p> |                             |     |
| Radical formation potential by DCF-Test:<br>(H <sub>2</sub> O <sub>2</sub> as positive control) (KIT)                                                                             | <div></div> <p>Result: SiNP_001 NPs induced a very low increase of DCFH oxidation at high concentrations indicating a negligible potential to produce reactive oxygen species.</p>                                                                                                                                                           |                             |     |
| Comments and other relevant physical-chemical properties and material characterization information                                                                                |                                                                                                                                                                                                                                                                                                                                                                                                                                 |                             |     |
| Place, Date Karlsruhe, 29.11.2016                                                                                                                                                 |                                                                                                                                                                                                                                                                                                                                                                                                                                 | Responsible H.-R. Paur, KIT |     |

|                                                                                                                           |                                                |                                                                                                                                                                                                 |                                             |
|---------------------------------------------------------------------------------------------------------------------------|------------------------------------------------|-------------------------------------------------------------------------------------------------------------------------------------------------------------------------------------------------|---------------------------------------------|
| <b>REPRESENTATIVE TEST PARTICLES</b><br>Nanomaterial Identification<br>according to OECD<br>ENV/JM/MONO(2009)20/REV pp29. |                                                |  Research Infrastructure<br><b>QualityNano</b>                                                                |                                             |
| Nanomaterial name                      Silica-NP<br>Particle Code                              SilNP_012                  |                                                | <b>Manufacturer /Institute/Date</b><br><br><b>Christopher Anderlohr ; provided by KIT; 10/2011</b><br><br><b>Technology Expert:</b> Dipl.-Ing. Christopher Anderlohr                            |                                             |
| Composition                              SiO <sub>2</sub><br>Method of production                      Flame-Synthesis    |                                                |                                                                                                                                                                                                 |                                             |
| <b>Kind of suspension:</b>                                                                                                |                                                | <b>Suspension</b> <input type="checkbox"/> <b>Powder</b> <input checked="" type="checkbox"/><br><br>Suspended in<br>pH                      _____<br>stabilizer                      none _____ |                                             |
| <b>Property</b>                                                                                                           | <b>unit</b>                                    | <b>Method / Institute</b>                                                                                                                                                                       | <b>Value</b>                                |
| Agglomeration/aggregation                                                                                                 |                                                | HRTEM (KIT)                                                                                                                                                                                     | Agglomerated                                |
| Crystalline phase                                                                                                         |                                                | D5000 Diffractometer (UU)<br>PANalytical X'Pert diffractometer (ICN)                                                                                                                            | Amorphous                                   |
| Crystallite size                                                                                                          |                                                | HRTEM (KIT)                                                                                                                                                                                     | n.a.                                        |
| Octanol-water partition coefficient                                                                                       |                                                | Extraction/ ICP-MS (ICN)                                                                                                                                                                        | P <sub>OW</sub> =0                          |
| Photocatalytic activity                                                                                                   |                                                | Rhodamin-B Bleaching/UV-B-100<br>10mg/ml in Water (ICN)                                                                                                                                         | none                                        |
| Porosity                                                                                                                  | -/- or %                                       | n.a.                                                                                                                                                                                            | non-porous                                  |
| Pour density                                                                                                              | cm <sup>3</sup> /g                             | (BJH) Pore Size Distribution and<br>Volume by ASAP2020 (UU)                                                                                                                                     | 0.14                                        |
| Size distribution:<br>(suspension in<br>water)                                                                            | Modal value X <sub>M</sub> (PDI)               | nm<br><br>Zetasizer Nano ZS /UCD<br>DCS (UCD) (RWtAv / RNumAv)                                                                                                                                  | 214.2 (PDI:0.215)/<br>NM: 125.2<br><br>n.a. |
|                                                                                                                           | Total concentration                            | mg/ml                                                                                                                                                                                           | 1mg/ml                                      |
| Size distribution:<br>(Aerosol)                                                                                           | Modal value X <sub>M</sub> (σ <sub>geo</sub> ) | nm<br><br>SMPS TSI. DMA 3071 with CPC<br>3022A / KIT<br>dispersed by electrospray                                                                                                               | 160 (σ <sub>geo</sub> =1.59)                |
|                                                                                                                           | Total concentration                            | mg/cm <sup>3</sup> or #/cm <sup>3</sup>                                                                                                                                                         | n.a.                                        |
| Solubility in _____                                                                                                       | g/l                                            |                                                                                                                                                                                                 |                                             |
| Solubility in H <sub>2</sub> O after 30 days                                                                              | mg/ml                                          | Extraction/ ICP-MS (ICN)                                                                                                                                                                        | 6                                           |
| Specific surface area                                                                                                     | cm <sup>2</sup> /g                             | BET by ASAP2020 (UU)                                                                                                                                                                            | 72.3                                        |
| Surface chemistry                                                                                                         |                                                |                                                                                                                                                                                                 |                                             |
| Zeta potential (surface charge)                                                                                           | eV                                             | Zetasizer Nano ZS /UU                                                                                                                                                                           | -16.2 ± 5.8mV<br>(pH 4.58)                  |

|                                                                                                                                                                                                  |                                                                                                                                                                                                                                                                                                                                                                                                                                                                                        |                                    |      |
|--------------------------------------------------------------------------------------------------------------------------------------------------------------------------------------------------|----------------------------------------------------------------------------------------------------------------------------------------------------------------------------------------------------------------------------------------------------------------------------------------------------------------------------------------------------------------------------------------------------------------------------------------------------------------------------------------|------------------------------------|------|
| Summary of trace analyses                                                                                                                                                                        |                                                                                                                                                                                                                                                                                                                                                                                                                                                                                        | ICP-MS / KIT                       |      |
| Na                                                                                                                                                                                               | µg/g                                                                                                                                                                                                                                                                                                                                                                                                                                                                                   |                                    | 6.6  |
| Mg                                                                                                                                                                                               | µg/g                                                                                                                                                                                                                                                                                                                                                                                                                                                                                   |                                    | 1.9  |
| Al                                                                                                                                                                                               | µg/g                                                                                                                                                                                                                                                                                                                                                                                                                                                                                   |                                    | 22.6 |
| K                                                                                                                                                                                                | µg/g                                                                                                                                                                                                                                                                                                                                                                                                                                                                                   |                                    | 6.6  |
| Ca                                                                                                                                                                                               | µg/g                                                                                                                                                                                                                                                                                                                                                                                                                                                                                   |                                    | 20.3 |
| Ti                                                                                                                                                                                               | µg/g                                                                                                                                                                                                                                                                                                                                                                                                                                                                                   |                                    | 0.7  |
| Cr                                                                                                                                                                                               | µg/g                                                                                                                                                                                                                                                                                                                                                                                                                                                                                   |                                    | < 1  |
| Mn                                                                                                                                                                                               | µg/g                                                                                                                                                                                                                                                                                                                                                                                                                                                                                   |                                    | 0.20 |
| Fe                                                                                                                                                                                               | µg/g                                                                                                                                                                                                                                                                                                                                                                                                                                                                                   |                                    | 12.4 |
| Ni                                                                                                                                                                                               | µg/g                                                                                                                                                                                                                                                                                                                                                                                                                                                                                   |                                    | <0.5 |
| Cu                                                                                                                                                                                               | µg/g                                                                                                                                                                                                                                                                                                                                                                                                                                                                                   |                                    | 0.26 |
| Zn                                                                                                                                                                                               | µg/g                                                                                                                                                                                                                                                                                                                                                                                                                                                                                   |                                    | 1.6  |
| Pb                                                                                                                                                                                               | µg/g                                                                                                                                                                                                                                                                                                                                                                                                                                                                                   |                                    | 0.13 |
| <b>Electron microscopy</b><br>Method / technical data of microscope:<br>SOP: See KIT (LEM)<br><br>Magnification: 450.000<br><br>FEI Tecna i 120<br>SOP: see UCD<br><br>UNIVLEEDS<br>TEM/ SEM-EDX | <div></div> <p>Electron Microscopy by KIT (LEM); Diameter : 10-60 nm</p> <div></div> <p>Electron Microscopy by UCD<br/>Av. Diameter (ImageJ) ~49nm (Std. Dev 12.77 )</p> <div></div> <p>SiINP 0012 Av. Diameter =48.93 nm</p> |                                    |      |
| Radical formation potential by DCF-Test:<br>(H <sub>2</sub> O <sub>2</sub> as positive control) (KIT)                                                                                            | <div></div> <p>Result: SiINP_012 NPs induced a weak increase of DCFH oxidation at concentrations from 12.5 and 400 µg/ml.</p>                                                                                                                                                                                                                                                                      |                                    |      |
| <b>Comments and other relevant physical-chemical properties and material characterization information</b>                                                                                        |                                                                                                                                                                                                                                                                                                                                                                                                                                                                                        |                                    |      |
| <b>Place, Date Karlsruhe, 29.11.2016</b>                                                                                                                                                         |                                                                                                                                                                                                                                                                                                                                                                                                                                                                                        | <b>Responsible H.-R. Paur. KIT</b> |      |

|                                                                                                                           |                                                |                                                                                                                                                                                                 |                                            |
|---------------------------------------------------------------------------------------------------------------------------|------------------------------------------------|-------------------------------------------------------------------------------------------------------------------------------------------------------------------------------------------------|--------------------------------------------|
| <b>REPRESENTATIVE TEST PARTICLES</b><br>Nanomaterial Identification<br>according to OECD<br>ENV/JM/MONO(2009)20/REV pp29. |                                                |                                                                                                               |                                            |
| Nanomaterial name                      Silica-NP<br>Particle Code                              SilNP_013                  |                                                | <b>Manufacturer /Institute/Date</b><br><br><b>Christopher Anderlohr ; provided by KIT; 10/2011</b><br><br><b>Technology Expert:</b> Dipl.-Ing. Christopher Anderlohr                            |                                            |
| Composition                              SiO <sub>2</sub><br>Method of production                      Flame-Synthesis    |                                                |                                                                                                                                                                                                 |                                            |
| <b>Kind of suspension:</b>                                                                                                |                                                | <b>Suspension</b> <input type="checkbox"/> <b>Powder</b> <input checked="" type="checkbox"/><br><br>Suspended in<br>pH                      _____<br>stabilizer                      none _____ |                                            |
| <b>Property</b>                                                                                                           | <b>unit</b>                                    | <b>Method / Institute</b>                                                                                                                                                                       | <b>Value</b>                               |
| Agglomeration/aggregation                                                                                                 |                                                | HRTEM (KIT)                                                                                                                                                                                     | Agglomerated                               |
| Crystalline phase                                                                                                         |                                                | D5000 Diffractometer (UU)<br>PANalytical X'Pert diffractometer (ICN)                                                                                                                            | Amorphous                                  |
| Crystallite size                                                                                                          |                                                | HRTEM (KIT)                                                                                                                                                                                     | n.a.                                       |
| Octanol-water partition coefficient                                                                                       |                                                | Extraction/ ICP-MS (ICN)                                                                                                                                                                        | P <sub>OW</sub> =0                         |
| Photocatalytic activity                                                                                                   |                                                | Rhodamin-B Bleaching/UV-B-100<br>10mg/ml in Water (ICN)                                                                                                                                         | none                                       |
| Porosity                                                                                                                  | -/- or %                                       | n.a.                                                                                                                                                                                            | non-porous                                 |
| Pour density                                                                                                              | cm <sup>3</sup> /g                             | (BJH) Pore Size Distribution and<br>Volume by ASAP2020 (UU)                                                                                                                                     | 0.13                                       |
| Size distribution:<br>(suspension in water)                                                                               | Modal value X <sub>M</sub> (PDI)               | nm<br><br>Zetasizer Nano ZS /UCD<br>DCS (UCD) (RWtAv / RNumAv)                                                                                                                                  | 187.2 (PDI:0.18)/<br>NM: 122.8<br><br>n.a. |
|                                                                                                                           | Total concentration                            | mg/ml                                                                                                                                                                                           | 1mg/ml                                     |
| Size distribution:<br>(Aerosol)                                                                                           | Modal value X <sub>M</sub> (σ <sub>geo</sub> ) | nm<br><br>SMPS TSI, DMA 3071 with CPC<br>3022A / KIT<br>dispersed by electrospray                                                                                                               | 166 (σ <sub>geo</sub> =1.55)               |
|                                                                                                                           | Total concentration                            | mg/cm <sup>3</sup> or #/cm <sup>3</sup>                                                                                                                                                         | n.a.                                       |
| Solubility in _____                                                                                                       | g/l                                            |                                                                                                                                                                                                 |                                            |
| Solubility in H <sub>2</sub> O after 30 days                                                                              | mg/ml                                          | Extraction/ ICP-MS (ICN)                                                                                                                                                                        | 8.75                                       |
| Specific surface area                                                                                                     | cm <sup>2</sup> /g                             | BET by ASAP2020 (UU)                                                                                                                                                                            | 77.5                                       |
| Surface chemistry                                                                                                         |                                                |                                                                                                                                                                                                 |                                            |
| Zeta potential (surface charge)                                                                                           | eV                                             | Zetasizer Nano ZS /UU                                                                                                                                                                           | -16.2 ± 7.4mV<br>(pH 4.53)                 |

|                                                                                                                                                                                                  |                                                                                                                                                                                                                                                                                                                                                                                                                                                                                                                                                                                                                                                                                                                                               |                             |      |
|--------------------------------------------------------------------------------------------------------------------------------------------------------------------------------------------------|-----------------------------------------------------------------------------------------------------------------------------------------------------------------------------------------------------------------------------------------------------------------------------------------------------------------------------------------------------------------------------------------------------------------------------------------------------------------------------------------------------------------------------------------------------------------------------------------------------------------------------------------------------------------------------------------------------------------------------------------------|-----------------------------|------|
| Summary of trace analyses                                                                                                                                                                        |                                                                                                                                                                                                                                                                                                                                                                                                                                                                                                                                                                                                                                                                                                                                               | ICP-MS / KIT                |      |
| Na                                                                                                                                                                                               | µg/g                                                                                                                                                                                                                                                                                                                                                                                                                                                                                                                                                                                                                                                                                                                                          |                             | 8.5  |
| Mg                                                                                                                                                                                               | µg/g                                                                                                                                                                                                                                                                                                                                                                                                                                                                                                                                                                                                                                                                                                                                          |                             | 1.3  |
| Al                                                                                                                                                                                               | µg/g                                                                                                                                                                                                                                                                                                                                                                                                                                                                                                                                                                                                                                                                                                                                          |                             | 3.2  |
| K                                                                                                                                                                                                | µg/g                                                                                                                                                                                                                                                                                                                                                                                                                                                                                                                                                                                                                                                                                                                                          |                             | 6.0  |
| Ca                                                                                                                                                                                               | µg/g                                                                                                                                                                                                                                                                                                                                                                                                                                                                                                                                                                                                                                                                                                                                          |                             | 6.2  |
| Mn                                                                                                                                                                                               | µg/g                                                                                                                                                                                                                                                                                                                                                                                                                                                                                                                                                                                                                                                                                                                                          |                             | 0.15 |
| Fe                                                                                                                                                                                               | µg/g                                                                                                                                                                                                                                                                                                                                                                                                                                                                                                                                                                                                                                                                                                                                          |                             | 8.3  |
| Cu                                                                                                                                                                                               | µg/g                                                                                                                                                                                                                                                                                                                                                                                                                                                                                                                                                                                                                                                                                                                                          |                             | 0.26 |
| Zn                                                                                                                                                                                               | µg/g                                                                                                                                                                                                                                                                                                                                                                                                                                                                                                                                                                                                                                                                                                                                          |                             | 1.1  |
| <b>Electron microscopy</b><br>Method / technical data of microscope:<br>SOP: See KIT (LEM)<br><br>Magnification: 450.000<br><br>FEI Tecna i 120<br>SOP: see UCD<br><br>UNIVLEEDS<br>TEM/ SEM-EDX | <div></div> <p>Electron Microscopy by KIT (LEM); Diameter : 10-60 nm</p> <div></div> <p>Electron Microscopy by UCD<br/>Av. Diameter (ImageJ) ≈ 38nm (Std. Dev 9.18 )</p> <div></div> <p>SiNP_0013 Av. Diameter =56.83 nm</p> |                             |      |
| Radical formation potential by DCF-Test:<br>(H <sub>2</sub> O <sub>2</sub> as positive control) (KIT)                                                                                            | <div></div> <p>Result: SiNP_013 NPs induced a weak increase of DCFH oxidation at concentrations from 12.5 and 400 µg/ml.</p>                                                                                                                                                                                                                                                                                                                                                                                                                                                                                                                              |                             |      |
| Comments and other relevant physical-chemical properties and material characterization information                                                                                               |                                                                                                                                                                                                                                                                                                                                                                                                                                                                                                                                                                                                                                                                                                                                               |                             |      |
| Place, Date Karlsruhe, 29.11.2016                                                                                                                                                                |                                                                                                                                                                                                                                                                                                                                                                                                                                                                                                                                                                                                                                                                                                                                               | Responsible H.-R. Paur, KIT |      |

| REPRESENTATIVE TEST PARTICLES                                                     |                                                |                                         |                                                                      | Research Infrastructure<br><b>QualityNano</b>                                                                                                              |  |
|-----------------------------------------------------------------------------------|------------------------------------------------|-----------------------------------------|----------------------------------------------------------------------|------------------------------------------------------------------------------------------------------------------------------------------------------------|--|
| Nanomaterial Identification<br>according to OECD<br>ENV/JM/MONO(2009)20/REV pp29. |                                                |                                         |                                                                      |                                                                                                                                                            |  |
| Nanomaterial name                                                                 |                                                | Silica-NP                               |                                                                      | <b>Manufacturer /Institute/Date</b><br><b>Christopher Anderlohr ; provided by KIT; 10/2011</b>                                                             |  |
| Particle Code                                                                     |                                                | SiINP_014                               |                                                                      | <b>Technology Expert:</b> Dipl.-Ing. Christopher Anderlohr                                                                                                 |  |
| Composition                                                                       |                                                | SiO <sub>2</sub>                        |                                                                      |                                                                                                                                                            |  |
| Method of production                                                              |                                                | Flame-Synthesis                         |                                                                      |                                                                                                                                                            |  |
| <b>Kind of suspension:</b>                                                        |                                                |                                         |                                                                      | <b>Suspension</b> <input type="checkbox"/> <b>Powder</b> <input checked="" type="checkbox"/><br>Suspended in _____<br>pH _____<br>stabilizer <u>none</u>   |  |
| <b>Property</b>                                                                   |                                                | <b>unit</b>                             | <b>Method / Institute</b>                                            | <b>Value</b>                                                                                                                                               |  |
| Agglomeration/aggregation                                                         |                                                |                                         | HRTEM (KIT)                                                          | Agglomerated                                                                                                                                               |  |
| Crystalline phase                                                                 |                                                |                                         | D5000 Diffractometer (UU)<br>PANalytical X'Pert diffractometer (ICN) | Amorphous                                                                                                                                                  |  |
| Crystallite size                                                                  |                                                |                                         | HRTEM (KIT)                                                          | n.a.                                                                                                                                                       |  |
| Octanol-water partition coefficient                                               |                                                |                                         | Extraction/ ICP-MS (ICN)                                             | P <sub>OW</sub> =0                                                                                                                                         |  |
| Photocatalytic activity                                                           |                                                |                                         | Rhodamin-B Bleaching/UV-B-100<br>10mg/ml in Water (ICN)              | none                                                                                                                                                       |  |
| Porosity                                                                          |                                                | -/- or %                                | n.a.                                                                 | non-porous                                                                                                                                                 |  |
| Pour density                                                                      |                                                | cm3/g                                   | (BJH) Pore Size Distribution and Volume by ASAP2020 (UU)             | 0.13                                                                                                                                                       |  |
| Size distribution:<br>(suspension in water)                                       | Modal value X <sub>M</sub> (PDI)               | nm                                      | Zetasizer Nano ZS /UCD                                               | <b>H<sub>2</sub>O</b> : 217.9 (PDI:0.275)/ NM: 113.1<br><b>HNO<sub>3</sub></b> : 1667 (PDI:0.641)/ NM: 825.6<br><b>NaOH</b> : 344.4 (PDI:0.434)/ NM: 114.1 |  |
|                                                                                   | Total concentration                            | mg/ml                                   | DCS (UCD) (RWtAv / RNumAv)                                           | n.a.                                                                                                                                                       |  |
|                                                                                   |                                                |                                         |                                                                      | 1mg/ml                                                                                                                                                     |  |
| Size distribution:<br>(Aerosol)                                                   | Modal value X <sub>M</sub> (σ <sub>geo</sub> ) | nm                                      | SMPS TSI, DMA 3071 with CPC 3022A / KIT<br>dispersed by electrospray | 32.5 (σ <sub>geo</sub> =1.27)                                                                                                                              |  |
|                                                                                   | Total concentration                            | mg/cm <sup>3</sup> or #/cm <sup>3</sup> |                                                                      | 1.6x 10 <sup>5</sup>                                                                                                                                       |  |
| Solubility in _____                                                               |                                                | g/l                                     |                                                                      |                                                                                                                                                            |  |
| Solubility in H <sub>2</sub> O after 30 days                                      |                                                | mg/ml                                   | Extraction/ ICP-MS (ICN)                                             | 6.5                                                                                                                                                        |  |
| Specific surface area                                                             |                                                | cm²/g                                   | BET by ASAP2020 (UU)                                                 | 76.1                                                                                                                                                       |  |
| Surface chemistry                                                                 |                                                |                                         |                                                                      |                                                                                                                                                            |  |
| Zeta potential (surface charge)                                                   |                                                | eV                                      | Zetasizer Nano ZS /UU                                                | -15.5 ± 6.9mV (pH 4.39)                                                                                                                                    |  |

|                                                                                                                                                                                                          |      |                                                                                                                                                                                                                       |       |
|----------------------------------------------------------------------------------------------------------------------------------------------------------------------------------------------------------|------|-----------------------------------------------------------------------------------------------------------------------------------------------------------------------------------------------------------------------|-------|
| Summary of trace analyses                                                                                                                                                                                |      | ICP-MS / KIT                                                                                                                                                                                                          |       |
| Na                                                                                                                                                                                                       | µg/g |                                                                                                                                                                                                                       | 4.5   |
| Mg                                                                                                                                                                                                       | µg/g |                                                                                                                                                                                                                       | 0.5   |
| Al                                                                                                                                                                                                       | µg/g |                                                                                                                                                                                                                       | 1.0   |
| Ca                                                                                                                                                                                                       | µg/g |                                                                                                                                                                                                                       | 6.2   |
| Mn                                                                                                                                                                                                       | µg/g |                                                                                                                                                                                                                       | <0.05 |
| Fe                                                                                                                                                                                                       | µg/g |                                                                                                                                                                                                                       | 8.5   |
| Ni                                                                                                                                                                                                       | µg/g |                                                                                                                                                                                                                       | <0.5  |
| Cu                                                                                                                                                                                                       | µg/g |                                                                                                                                                                                                                       | 0.15  |
| Zn                                                                                                                                                                                                       | µg/g |                                                                                                                                                                                                                       | 0.6   |
| Pb                                                                                                                                                                                                       | µg/g |                                                                                                                                                                                                                       | <0.05 |
| <b>Electron microscopy</b><br>Method / technical data of microscope:<br>SOP: See KIT (LEM)<br><br>Magnification: 450.000<br><br><br>FEI Tecna i 120<br>SOP: see UCD<br><br><br>UNIVLEEDS<br>TEM/ SEM-EDX |      |  <p>Electron Microscopy by KIT (LEM); Diameter : 10-80 nm</p> <p>Electron Microscopy by UCD<br/>Av. Diameter (ImageJ) = 40.6nm</p> |       |
| Radical formation potential by DCF-Test:<br>(H <sub>2</sub> O <sub>2</sub> as positive control) (KIT)                                                                                                    |      |  <p>Result: SiNP_014 NPs induced a weak increase of DCFH oxidation at concentrations from 12.5 and 400 µg/ml.</p>                 |       |
| Comments and other relevant physical-chemical properties and material characterization information                                                                                                       |      |                                                                                                                                                                                                                       |       |
| Place, Date Karlsruhe, 29.11.2016                                                                                                                                                                        |      | Responsible H.-R. Paur, KIT                                                                                                                                                                                           |       |



|                                                                                                                                                               |                                                                                                                                                                                                                   |                             |      |
|---------------------------------------------------------------------------------------------------------------------------------------------------------------|-------------------------------------------------------------------------------------------------------------------------------------------------------------------------------------------------------------------|-----------------------------|------|
| Summary of trace analyses                                                                                                                                     |                                                                                                                                                                                                                   | ICP-MS / KIT                |      |
| Li                                                                                                                                                            | µg/g                                                                                                                                                                                                              |                             | <0.1 |
| Na                                                                                                                                                            | µg/g                                                                                                                                                                                                              |                             | 4.3  |
| Mg                                                                                                                                                            | µg/g                                                                                                                                                                                                              |                             | 3.4  |
| Al                                                                                                                                                            | µg/g                                                                                                                                                                                                              |                             | 12   |
| Ca                                                                                                                                                            | µg/g                                                                                                                                                                                                              |                             | 7.8  |
| Mn                                                                                                                                                            | µg/g                                                                                                                                                                                                              |                             | 0.25 |
| Fe                                                                                                                                                            | µg/g                                                                                                                                                                                                              |                             | 6.7  |
| Ni                                                                                                                                                            | µg/g                                                                                                                                                                                                              |                             | 0.7  |
| Cu                                                                                                                                                            | µg/g                                                                                                                                                                                                              |                             | 0.49 |
| Zn                                                                                                                                                            | µg/g                                                                                                                                                                                                              |                             | 1.7  |
| Pb                                                                                                                                                            | µg/g                                                                                                                                                                                                              |                             | <0.1 |
| <b>Electron microscopy</b><br>Method / technical data of microscope:<br>SOP: See KIT (LEM)<br><br>Magnification: 450.000<br><br><br>UNIVLEEDS<br>TEM/ SEM-EDX | <div></div> <p>Electron Microscopy by KIT (LEM); Diameter : 15-150 nm</p>                                                      |                             |      |
| Radical formation potential by DCF-Test:<br>(H <sub>2</sub> O <sub>2</sub> as positive control) (KIT)                                                         | <div></div> <p>Result: SiINP_015 NPs induced a weak increase of DCFH oxidation at concentrations from 12.5 and 400 µg/ml.</p> |                             |      |
| Comments and other relevant physical-chemical properties and material characterization information                                                            |                                                                                                                                                                                                                   |                             |      |
| Place, Date Karlsruhe, 29.11.2016                                                                                                                             |                                                                                                                                                                                                                   | Responsible H.-R. Paur, KIT |      |

| <b>REPRESENTATIVE TEST PARTICLES</b><br>Nanomaterial Identification<br>according to OECD<br>ENV/JM/MONO(2009)20/REV pp29. |                                                |                                                                                                                                                                                   |  <b>QualityNano</b><br>Research Infrastructure |                                                                                                                                                                                                  |
|---------------------------------------------------------------------------------------------------------------------------|------------------------------------------------|-----------------------------------------------------------------------------------------------------------------------------------------------------------------------------------|----------------------------------------------------------------------------------------------------------------------------------|--------------------------------------------------------------------------------------------------------------------------------------------------------------------------------------------------|
| Nanomaterial name                      Silica-NP<br>Particle Code                              SilNP_016                  |                                                | <b>Manufacturer /Institute/Date</b><br><b>Christopher Anderlohr ; provided by KIT; 10/2011</b><br><br><b>Technology Expert:</b> Christopher Anderlohr                             |                                                                                                                                  |                                                                                                                                                                                                  |
| Composition                              SiO <sub>2</sub><br>Method of production                      Flame-Synthesis    |                                                |                                                                                                                                                                                   |                                                                                                                                  |                                                                                                                                                                                                  |
| <b>Kind of suspension:</b>                                                                                                |                                                | <b>Suspension</b> <input type="checkbox"/> <b>Powder</b> <input checked="" type="checkbox"/><br><br>Suspended in _____<br>pH                      _____<br>stabilizer <u>none</u> |                                                                                                                                  |                                                                                                                                                                                                  |
| Property                                                                                                                  | unit                                           | Method / Institute                                                                                                                                                                | Value                                                                                                                            |                                                                                                                                                                                                  |
| Agglomeration/aggregation                                                                                                 |                                                | HRTEM (KIT)                                                                                                                                                                       | Agglomerated                                                                                                                     |                                                                                                                                                                                                  |
| Crystalline phase                                                                                                         |                                                | D5000 Diffractometer (UU)<br>PANalytical X'Pert diffractometer (ICN)                                                                                                              | Amorphous                                                                                                                        |                                                                                                                                                                                                  |
| Crystallite size                                                                                                          |                                                | HRTEM (KIT)                                                                                                                                                                       | n.a.                                                                                                                             |                                                                                                                                                                                                  |
| Octanol-water partition coefficient                                                                                       |                                                | Extraction/ ICP-MS (ICN)                                                                                                                                                          | P <sub>OW</sub> =0                                                                                                               |                                                                                                                                                                                                  |
| Photocatalytic activity                                                                                                   |                                                | Rhodamin-B Bleaching/UV-B-100<br>10mg/ml in Water (ICN)                                                                                                                           | none                                                                                                                             |                                                                                                                                                                                                  |
| Porosity                                                                                                                  | -/- or %                                       | n.a.                                                                                                                                                                              | non-porous                                                                                                                       |                                                                                                                                                                                                  |
| Pour density                                                                                                              | cm <sup>3</sup> /g                             | (BJH) Pore Size Distribution and<br>Volume by ASAP2020 (UU)                                                                                                                       | 0.07                                                                                                                             |                                                                                                                                                                                                  |
| Size distribution:<br>(suspension in<br>water)                                                                            | Modal value X <sub>M</sub> (PDI)               | nm                                                                                                                                                                                | Zetasizer Nano ZS /UCD<br><br><br><br><br><br>DCS (UCD) (RWtAv / RNumAv)                                                         | <b>H<sub>2</sub>O:</b> 253.3<br>(PDI: 0.276)/<br>NM: 160.15<br><br><b>HNO<sub>3</sub>:</b> 1486<br>(PDI: 0.498)/<br>NM: 893.95<br><br><b>NaOH:</b> 151<br>(PDI: 0.348)/<br>NM: 31.68<br><br>n.a. |
|                                                                                                                           | Total concentration                            | mg/ml                                                                                                                                                                             |                                                                                                                                  | 1mg/ml                                                                                                                                                                                           |
| Size distribution:<br>(Aerosol)                                                                                           | Modal value X <sub>M</sub> (σ <sub>geo</sub> ) | nm                                                                                                                                                                                | SMPS TSI, DMA 3071 with CPC<br>3022A / KIT<br>dispersed by electrospray                                                          | 37.7 (σ <sub>geo</sub> =1.26)                                                                                                                                                                    |
|                                                                                                                           | Total concentration                            | mg/cm <sup>3</sup> or #/cm <sup>3</sup>                                                                                                                                           |                                                                                                                                  | n.a.                                                                                                                                                                                             |
| Solubility in _____                                                                                                       | g/l                                            |                                                                                                                                                                                   |                                                                                                                                  |                                                                                                                                                                                                  |
| Solubility in H <sub>2</sub> O after 30 days                                                                              | mg/ml                                          | Extraction/ ICP-MS (ICN)                                                                                                                                                          | 9.5                                                                                                                              |                                                                                                                                                                                                  |
| Specific surface area                                                                                                     | cm <sup>2</sup> /g                             | BET by ASAP2020 (UU)                                                                                                                                                              | 31.1                                                                                                                             |                                                                                                                                                                                                  |
| Surface chemistry                                                                                                         |                                                |                                                                                                                                                                                   |                                                                                                                                  |                                                                                                                                                                                                  |
| Zeta potential (surface charge)                                                                                           | eV                                             | Zetasizer Nano ZS /UU                                                                                                                                                             | -18.1 ± 5.6mV<br>(pH 4.29)                                                                                                       |                                                                                                                                                                                                  |

|                                                                                                                                                               |      |                                                                                                                                                                                                                                                                                                                                                                                 |       |
|---------------------------------------------------------------------------------------------------------------------------------------------------------------|------|---------------------------------------------------------------------------------------------------------------------------------------------------------------------------------------------------------------------------------------------------------------------------------------------------------------------------------------------------------------------------------|-------|
| Summary of trace analyses                                                                                                                                     |      | ICP-MS / KIT                                                                                                                                                                                                                                                                                                                                                                    |       |
| Li                                                                                                                                                            | µg/g |                                                                                                                                                                                                                                                                                                                                                                                 | <0.1  |
| Na                                                                                                                                                            | µg/g |                                                                                                                                                                                                                                                                                                                                                                                 | 6.0   |
| Mg                                                                                                                                                            | µg/g |                                                                                                                                                                                                                                                                                                                                                                                 | 2.0   |
| Al                                                                                                                                                            | µg/g |                                                                                                                                                                                                                                                                                                                                                                                 | 2.8   |
| K                                                                                                                                                             | µg/g |                                                                                                                                                                                                                                                                                                                                                                                 | <2    |
| Ca                                                                                                                                                            | µg/g |                                                                                                                                                                                                                                                                                                                                                                                 | 7.4   |
| Mn                                                                                                                                                            | µg/g |                                                                                                                                                                                                                                                                                                                                                                                 | <0.05 |
| Fe                                                                                                                                                            | µg/g |                                                                                                                                                                                                                                                                                                                                                                                 | 4.8   |
| Ni                                                                                                                                                            | µg/g |                                                                                                                                                                                                                                                                                                                                                                                 | 0.6   |
| Cu                                                                                                                                                            | µg/g |                                                                                                                                                                                                                                                                                                                                                                                 | 0.49  |
| Zn                                                                                                                                                            | µg/g |                                                                                                                                                                                                                                                                                                                                                                                 | 1.3   |
| <b>Electron microscopy</b><br>Method / technical data of microscope:<br>SOP: See KIT (LEM)<br><br>Magnification: 450.000<br><br><br>UNIVLEEDS<br>TEM/ SEM-EDX |      | <div><p>Electron Microscopy by KIT (LEM); Diameter : 20-120 nm</p></div> <div><p>TEM/ SEM-EDX image showing particles and an EDX spectrum (Spectrum 4) with peaks for C, O, Cu, Si, Al, and Au.</p></div> |       |
| Radical formation potential by DCF-Test:<br>(H <sub>2</sub> O <sub>2</sub> as positive control) (KIT)                                                         |      | <div><p>DCF fluorescence [fold increase]</p><p>Particle concentration [µg/ml]</p><p>SiINP_016</p><p>H2O2 0.3 µM</p></div> <p>Result: SiINP_016 NPs induced a weak increase of DCFH oxidation at concentrations from 12.5 and 400 µg/ml.</p>                                                 |       |
| Comments and other relevant physical-chemical properties and material characterization information                                                            |      |                                                                                                                                                                                                                                                                                                                                                                                 |       |
| Place, Date Karlsruhe, 29.11.2016                                                                                                                             |      | Responsible H.-R. Paur, KIT                                                                                                                                                                                                                                                                                                                                                     |       |

| <b>REPRESENTATIVE TEST PARTICLES</b><br>Nanomaterial Identification<br>according to OECD<br>ENV/JM/MONO(2009)20/REV pp29. |                                                |                                         |                                                                                                                                                                                                                                                |  Research Infrastructure<br><b>QualityNano</b> |                                                                                                                                                                                               |
|---------------------------------------------------------------------------------------------------------------------------|------------------------------------------------|-----------------------------------------|------------------------------------------------------------------------------------------------------------------------------------------------------------------------------------------------------------------------------------------------|----------------------------------------------------------------------------------------------------------------------------------|-----------------------------------------------------------------------------------------------------------------------------------------------------------------------------------------------|
| Nanomaterial name                      Silica-NP<br>Particle Code                              SiINP_017                  |                                                |                                         | <b>Manufacturer /Institute/Date</b><br><br><b>Christopher Anderlohr ; provided by KIT; 10/2011</b>                                                                                                                                             |                                                                                                                                  |                                                                                                                                                                                               |
| Composition                              SiO <sub>2</sub><br>Method of production                      Flame-Synthesis    |                                                |                                         | <b>Technology Expert:</b> Christopher Anderlohr                                                                                                                                                                                                |                                                                                                                                  |                                                                                                                                                                                               |
| <b>Kind of suspension:</b>                                                                                                |                                                |                                         | <b>Suspension</b> <input type="checkbox"/> <b>Powder</b> <input checked="" type="checkbox"/><br><br>Suspended in                              _____<br>pH                                                      _____<br>stabilizer <u>none</u> |                                                                                                                                  |                                                                                                                                                                                               |
| <b>Property</b>                                                                                                           |                                                | <b>unit</b>                             | <b>Method / Institute</b>                                                                                                                                                                                                                      |                                                                                                                                  | <b>Value</b>                                                                                                                                                                                  |
| Agglomeration/aggregation                                                                                                 |                                                |                                         | HRTEM (KIT)                                                                                                                                                                                                                                    |                                                                                                                                  | Agglomerated                                                                                                                                                                                  |
| Crystalline phase                                                                                                         |                                                |                                         | D5000 Diffractometer (UU)<br>PANalytical X'Pert diffractometer (ICN)                                                                                                                                                                           |                                                                                                                                  | Amorphous                                                                                                                                                                                     |
| Crystallite size                                                                                                          |                                                |                                         | HRTEM (KIT)                                                                                                                                                                                                                                    |                                                                                                                                  | n.a.                                                                                                                                                                                          |
| Octanol-water partition coefficient                                                                                       |                                                |                                         | Extraction/ ICP-MS (ICN)                                                                                                                                                                                                                       |                                                                                                                                  | P <sub>OW</sub> =0                                                                                                                                                                            |
| Photocatalytic activity                                                                                                   |                                                |                                         | Rhodamin-B Bleaching/UV-B-100<br>10mg/ml in Water (ICN)                                                                                                                                                                                        |                                                                                                                                  | none                                                                                                                                                                                          |
| Porosity                                                                                                                  |                                                | -/- or %                                | n.a.                                                                                                                                                                                                                                           |                                                                                                                                  | non-porous                                                                                                                                                                                    |
| Pour density                                                                                                              |                                                | cm3/g                                   | (BJH) Pore Size Distribution and<br>Volume by ASAP2020 (UU)                                                                                                                                                                                    |                                                                                                                                  | 0.07                                                                                                                                                                                          |
| Size distribution:<br>(suspension in<br>water)                                                                            | Modal value X <sub>M</sub> (PDI)               | nm                                      | Zetasizer Nano ZS /UCD<br><br><br><br><br><br><br><br>DCS (UCD) (RWtAv / RNumAv)                                                                                                                                                               |                                                                                                                                  | <b>H<sub>2</sub>O:</b> 263<br>(PDI:0.319)/<br>NM: 191.26<br><br><b>HNO<sub>3</sub>:</b> 1293<br>(PDI:0.473)/<br>NM: 818.26<br><br><b>NaOH:</b> 147.1<br>(PDI:0.330)/<br>NM: 34.52<br><br>n.a. |
|                                                                                                                           | Total concentration                            | mg/ml                                   |                                                                                                                                                                                                                                                |                                                                                                                                  | 1mg/ml                                                                                                                                                                                        |
| Size distribution:<br>(Aerosol)                                                                                           | Modal value X <sub>M</sub> (σ <sub>geo</sub> ) | nm                                      | SMPS TSI, DMA 3071 with CPC<br>3022A / KIT<br>dispersed by electrospray                                                                                                                                                                        |                                                                                                                                  | 36.3 (σ <sub>geo</sub> =1.31)                                                                                                                                                                 |
|                                                                                                                           | Total concentration                            | mg/cm <sup>3</sup> or #/cm <sup>3</sup> |                                                                                                                                                                                                                                                |                                                                                                                                  | n.a.                                                                                                                                                                                          |
| Solubility in _____                                                                                                       |                                                | g/l                                     |                                                                                                                                                                                                                                                |                                                                                                                                  |                                                                                                                                                                                               |
| Solubility in H <sub>2</sub> O after 30 days                                                                              |                                                | mg/ml                                   | Extraction/ ICP-MS (ICN)                                                                                                                                                                                                                       |                                                                                                                                  | 1.8                                                                                                                                                                                           |
| Specific surface area                                                                                                     |                                                | cm <sup>2</sup> /g                      | BET by ASAP2020 (UU)                                                                                                                                                                                                                           |                                                                                                                                  | 38.8                                                                                                                                                                                          |
| Surface chemistry                                                                                                         |                                                |                                         |                                                                                                                                                                                                                                                |                                                                                                                                  |                                                                                                                                                                                               |
| Zeta potential (surface charge)                                                                                           |                                                | eV                                      | Zetasizer Nano ZS /UU                                                                                                                                                                                                                          |                                                                                                                                  | -18.3 ± 6.0mV<br>(pH 4.22)                                                                                                                                                                    |

|                                                                                                                                                              |      |                                                                                                                                                                                                                                         |      |
|--------------------------------------------------------------------------------------------------------------------------------------------------------------|------|-----------------------------------------------------------------------------------------------------------------------------------------------------------------------------------------------------------------------------------------|------|
| Summary of trace analyses                                                                                                                                    |      | ICP-MS / KIT                                                                                                                                                                                                                            |      |
| Li                                                                                                                                                           | µg/g |                                                                                                                                                                                                                                         | <0.1 |
| Na                                                                                                                                                           | µg/g |                                                                                                                                                                                                                                         | 5.3  |
| Mg                                                                                                                                                           | µg/g |                                                                                                                                                                                                                                         | 2.1  |
| Al                                                                                                                                                           | µg/g |                                                                                                                                                                                                                                         | 15.3 |
| K                                                                                                                                                            | µg/g |                                                                                                                                                                                                                                         | <2   |
| Ca                                                                                                                                                           | µg/g |                                                                                                                                                                                                                                         | 9.2  |
| Mn                                                                                                                                                           | µg/g |                                                                                                                                                                                                                                         | 0.12 |
| Fe                                                                                                                                                           | µg/g |                                                                                                                                                                                                                                         | 7.1  |
| Ni                                                                                                                                                           | µg/g |                                                                                                                                                                                                                                         | <0.5 |
| Cu                                                                                                                                                           | µg/g |                                                                                                                                                                                                                                         | 0.28 |
| Zn                                                                                                                                                           | µg/g |                                                                                                                                                                                                                                         | 2.5  |
| <b>Electron microscopy</b><br>Method / technical data of microscope:<br>SOP: See KIT (LEM)<br><br>Magnification: 450.000<br><br><br>UNILEEDS<br>TEM/ SEM-EDX |      | <br>Electron Microscopy by KIT (LEM); Diameter : 20-120 nm<br><br> |      |
| Radical formation potential by DCF-Test:<br>(H <sub>2</sub> O <sub>2</sub> as positive control) (KIT)                                                        |      | <br>Result: SiINP_017 NPs induced a significant DCFH oxidation at high concentrations indicating a potential to produce reactive oxygen species.    |      |
| <b>Comments and other relevant physical-chemical properties and material characterisation information</b>                                                    |      |                                                                                                                                                                                                                                         |      |
| Place, Date Karlsruhe, 29.11.2016                                                                                                                            |      | Responsible H.-R. Paur, KIT                                                                                                                                                                                                             |      |

## Supplemental S4: Physicochemical characterization data sheets of zinc oxide NMs

|                                                                                                                           |                                                |                                                                                                                                                                    |                                                                                                   |
|---------------------------------------------------------------------------------------------------------------------------|------------------------------------------------|--------------------------------------------------------------------------------------------------------------------------------------------------------------------|---------------------------------------------------------------------------------------------------|
| <b>REPRESENTATIVE TEST PARTICLES</b><br>Nanomaterial Identification<br>according to OECD<br>ENV/JM/MONO(2009)20/REV pp29. |                                                |  <b>QualityNano</b><br>Research Infrastructure                                   |                                                                                                   |
| Nanomaterial name      ZnO NPs B1-1<br>Particle Code              ZnO_NP001                                               |                                                | <b>Manufacturer /Institute/Date</b><br>Yunhong Jiang; provided by Univleeds; 03/2012<br><b>Technology Expert:</b> Yunhong Jiang                                    |                                                                                                   |
| Composition              ZnO<br>Method of production      B2B Synthesis                                                   |                                                |                                                                                                                                                                    |                                                                                                   |
| <b>Kind of suspension:</b>                                                                                                |                                                | <b>Suspension</b> <input type="checkbox"/> <b>Powder</b> <input checked="" type="checkbox"/><br>Suspended in _____<br>pH _____<br>stabilizer                  none |                                                                                                   |
| <b>Property</b>                                                                                                           | <b>unit</b>                                    | <b>Method / Institute</b>                                                                                                                                          | <b>Value</b>                                                                                      |
| Agglomeration/aggregation                                                                                                 |                                                | HRTEM (KIT)                                                                                                                                                        | crystalline                                                                                       |
| Crystalline phase                                                                                                         |                                                | D5000 Diffractometer (UU)<br>PANalytical X'Pert diffractometer (ICN)                                                                                               | Amorphous<br> |
| Crystallite size                                                                                                          |                                                | HRTEM (KIT)                                                                                                                                                        |                                                                                                   |
| Octanol-water partition coefficient                                                                                       |                                                | Extraction/ ICP-MS (ICN)                                                                                                                                           | P <sub>OW</sub> = 0                                                                               |
| Photocatalytic activity                                                                                                   |                                                | Rhodamin-B Bleaching/UV-B-100<br>10mg/ml in Water (ICN)                                                                                                            | high                                                                                              |
| Porosity                                                                                                                  | -/- or %                                       | n.a.                                                                                                                                                               |                                                                                                   |
| Pour density                                                                                                              | cm <sup>3</sup> /g                             | (BJH) Pore Size Distribution and Volume by ASAP2020 (UU)                                                                                                           | n.a.                                                                                              |
| Size distribution:<br>(suspension in water)                                                                               | Modal value X <sub>M</sub> (PDI)               | nm                                                                                                                                                                 | Zetasizer Nano ZS /UCD<br>656 (PDI:0.336)/<br>NM: 426.3                                           |
|                                                                                                                           | Total concentration                            | mg/ml                                                                                                                                                              | DCS (UCD) (RWtAv / RNumAv)<br>n.a.<br>1mg/ml                                                      |
| Size distribution:<br>(Aerosol)                                                                                           | Modal value X <sub>M</sub> (σ <sub>geo</sub> ) | nm                                                                                                                                                                 | SMPS TSI, DMA 3071 with CPC<br>3022A / KIT<br>dispersed by electrospray<br>n.a.                   |
| Solubility in _____                                                                                                       | g/l                                            |                                                                                                                                                                    |                                                                                                   |
| Solubility in H <sub>2</sub> O after 30 days                                                                              | mg/ml                                          | Extraction/ ICP-MS (ICN)                                                                                                                                           | 7                                                                                                 |
| Specific surface area                                                                                                     | cm <sup>2</sup> /g                             | BET by ASAP2020 (UU)                                                                                                                                               | n.a.                                                                                              |
| Surface chemistry                                                                                                         |                                                |                                                                                                                                                                    |                                                                                                   |
| Zeta potential (surface charge)                                                                                           | eV                                             | Zetasizer Nano ZS /UU                                                                                                                                              | +13.0 ± 3.3 mV<br>pH: 6.05                                                                        |

| Summary of trace analyses                                                                                                                                     |      | ICP-MS (KIT)                                                                                                                                                                                                                                             | Assay1 | Assay2 |
|---------------------------------------------------------------------------------------------------------------------------------------------------------------|------|----------------------------------------------------------------------------------------------------------------------------------------------------------------------------------------------------------------------------------------------------------|--------|--------|
| Na                                                                                                                                                            | µg/g |                                                                                                                                                                                                                                                          | 7.0    | 6.4    |
| Mg                                                                                                                                                            | µg/g |                                                                                                                                                                                                                                                          | 2.5    | <2.0   |
| Al                                                                                                                                                            | µg/g |                                                                                                                                                                                                                                                          | 3.6    | 2.9    |
| Ca                                                                                                                                                            | µg/g |                                                                                                                                                                                                                                                          | 7.2    | 6.0    |
| Fe                                                                                                                                                            | µg/g |                                                                                                                                                                                                                                                          | 7.7    | 8.0    |
| Ni                                                                                                                                                            | µg/g |                                                                                                                                                                                                                                                          | 1.7    | 1.9    |
| Cu                                                                                                                                                            | µg/g |                                                                                                                                                                                                                                                          | 1.8    | 1.9    |
| Sr                                                                                                                                                            | µg/g |                                                                                                                                                                                                                                                          | 22.0   | 23.3   |
| Cd                                                                                                                                                            | µg/g |                                                                                                                                                                                                                                                          | 3.5    | 3.7    |
| Ba                                                                                                                                                            | µg/g |                                                                                                                                                                                                                                                          | 0.1    | 0.1    |
| Tl                                                                                                                                                            | µg/g |                                                                                                                                                                                                                                                          | 1.5    | 1.5    |
| Pb                                                                                                                                                            | µg/g |                                                                                                                                                                                                                                                          | 11.4   | 11.3   |
| <b>Electron microscopy</b><br>Method / technical data of microscope:<br>SOP: See KIT (LEM)<br><br>Magnification: 450.000<br><br><br>UNIVLEEDS<br>TEM/ TEM-EDX |      |                                                                                                                                                                                                                                                          |        |        |
|                                                                                                                                                               |      | <br>Electron Microscopy by KIT (LEM); Diameter : 30-200 nm<br><br><br>ZnO NPs B1-1 |        |        |
| Radical formation potential by DCF-Test:<br>(H <sub>2</sub> O <sub>2</sub> as positive control) (KIT)                                                         |      | <br>Result: ZnO_NP001 induced a moderate increase of DCFH oxidation at concentrations from 25 to 400 µg/ml.                                                          |        |        |
| Comments and other relevant physical-chemical properties and material characterization information                                                            |      |                                                                                                                                                                                                                                                          |        |        |
| Place, Date Karlsruhe, 29.11.2016                                                                                                                             |      | Responsible H.-R. Paur, KIT                                                                                                                                                                                                                              |        |        |

|                                                                                                                           |                                      |                    |                                                                                                                                                                              |                                                                                                   |
|---------------------------------------------------------------------------------------------------------------------------|--------------------------------------|--------------------|------------------------------------------------------------------------------------------------------------------------------------------------------------------------------|---------------------------------------------------------------------------------------------------|
| <b>REPRESENTATIVE TEST PARTICLES</b><br>Nanomaterial Identification<br>according to OECD<br>ENV/JM/MONO(2009)20/REV pp29. |                                      |                    |                                                                                            |                                                                                                   |
| Nanomaterial name      ZnO NPs B 1-2<br>Particle Code              ZnO_NP002                                              |                                      |                    | <b>Manufacturer /Institute/Date</b><br>Yunhong Jiang; provided by Univleeds; 03/2012<br><b>Technology Expert:</b> Yunhong Jiang                                              |                                                                                                   |
| Composition              ZnO<br>Method of production      B2B Synthesis                                                   |                                      |                    |                                                                                                                                                                              |                                                                                                   |
| <b>Kind of suspension:</b>                                                                                                |                                      |                    | <b>Suspension</b> <input type="checkbox"/> <b>Powder</b> <input checked="" type="checkbox"/><br>Suspended in _____<br>pH _____<br>stabilizer                      none _____ |                                                                                                   |
| <b>Property</b>                                                                                                           |                                      | <b>unit</b>        | <b>Method / Institute</b>                                                                                                                                                    | <b>Value</b>                                                                                      |
| Agglomeration/aggregation                                                                                                 |                                      |                    | HRTEM (KIT)                                                                                                                                                                  | crystalline                                                                                       |
| Crystalline phase                                                                                                         |                                      |                    | D5000 Diffractometer (UU)<br>PANalytical X'Pert diffractometer (ICN)                                                                                                         | Amorphous<br> |
| Crystallite size                                                                                                          |                                      |                    | HRTEM (KIT)                                                                                                                                                                  |                                                                                                   |
| Octanol-water partition coefficient                                                                                       |                                      |                    | Extraction/ ICP-MS (ICN)                                                                                                                                                     | $P_{OW}=0$                                                                                        |
| Photocatalytic activity                                                                                                   |                                      |                    | Rhodamin-B Bleaching/UV-B-100<br>10mg/ml in Water (ICN)                                                                                                                      | high                                                                                              |
| Porosity                                                                                                                  |                                      | -/- or %           | n.a.                                                                                                                                                                         |                                                                                                   |
| Pour density                                                                                                              |                                      | cm3/g              | (BJH) Pore Size Distribution and Volume by ASAP2020 (UU)                                                                                                                     |                                                                                                   |
| Size distribution:<br>(suspension in water)                                                                               | Modal value $X_M$ (PDI)              | nm                 | Zetasizer Nano ZS /UCD<br><br>UNIVLEEDS<br><br>DCS (UCD) (RWtAv / RNumAv)                                                                                                    | 321,9 (PDI:0,293)/<br>NM: 181,5<br><br>179,5 (PDI:0,502)                                          |
|                                                                                                                           | Total concentration                  | mg/ml              |                                                                                                                                                                              | 1mg/ml                                                                                            |
| Size distribution:<br>(Aerosol)                                                                                           | Modal value $X_M$ ( $\sigma_{geo}$ ) | nm                 | SMPS TSI, DMA 3071 with CPC 3022A / KIT<br>dispersed by electrospray                                                                                                         |                                                                                                   |
| Solubility in _____                                                                                                       |                                      | g/l                |                                                                                                                                                                              |                                                                                                   |
| Solubility in H <sub>2</sub> O after 30 days                                                                              |                                      | mg/ml              | Extraction/ ICP-MS (ICN)                                                                                                                                                     | 4.5                                                                                               |
| Specific surface area                                                                                                     |                                      | cm <sup>2</sup> /g | BET by ASAP2020 (UU)                                                                                                                                                         |                                                                                                   |
| Surface chemistry                                                                                                         |                                      |                    |                                                                                                                                                                              |                                                                                                   |
| Zeta potential (surface charge)                                                                                           |                                      | eV                 | Zetasizer Nano ZS /UU                                                                                                                                                        | -10.0 ± 1.6 mV<br>pH: 5.89                                                                        |

| Summary of trace analyses                                                                                                                                                 |      | ICP-MS (KIT)                                                                                                                                                                                                                                                                     | Assay1 | Assay2 |
|---------------------------------------------------------------------------------------------------------------------------------------------------------------------------|------|----------------------------------------------------------------------------------------------------------------------------------------------------------------------------------------------------------------------------------------------------------------------------------|--------|--------|
| Na                                                                                                                                                                        | µg/g |                                                                                                                                                                                                                                                                                  | 55.1   | 27.6   |
| Mg                                                                                                                                                                        | µg/g |                                                                                                                                                                                                                                                                                  |        | 2.6    |
| Al                                                                                                                                                                        | µg/g |                                                                                                                                                                                                                                                                                  | 5.4    | 7.6    |
| Ca                                                                                                                                                                        | µg/g |                                                                                                                                                                                                                                                                                  | 14.3   | 14.0   |
| Fe                                                                                                                                                                        | µg/g |                                                                                                                                                                                                                                                                                  | 11.4   | 11.6   |
| Ni                                                                                                                                                                        | µg/g |                                                                                                                                                                                                                                                                                  | 2.9    | 2.4    |
| Cu                                                                                                                                                                        | µg/g |                                                                                                                                                                                                                                                                                  | 2.1    | 2.4    |
| Sr                                                                                                                                                                        | µg/g |                                                                                                                                                                                                                                                                                  | 27.4   | 26.6   |
| Cd                                                                                                                                                                        | µg/g |                                                                                                                                                                                                                                                                                  | 4.3    |        |
| Ba                                                                                                                                                                        | µg/g |                                                                                                                                                                                                                                                                                  | 0.2    | 0.2    |
| Tl                                                                                                                                                                        | µg/g |                                                                                                                                                                                                                                                                                  | 2.9    | 2.8    |
| Pb                                                                                                                                                                        | µg/g |                                                                                                                                                                                                                                                                                  | 16.7   | 15.7   |
| <b>Electron microscopy</b><br>Method / technical data of microscope:<br>SOP: See KIT (LEM)<br><br>Magnification: 450.000<br><br><br><br><br><br><br><br><br><br>UNIVLEEDS |      | <div></div> <p>Electron Microscopy by KIT (LEM); Diameter : 30-200 nm</p> <div></div> <p>ZnO NPs B 1-2</p> |        |        |
| Radical formation potential by DCF-Test:<br>(H <sub>2</sub> O <sub>2</sub> as positive control) (KIT)                                                                     |      | <div></div> <p>Result: ZnO_NP002 induced a moderate increase of DCFH oxidation at concentrations from 25 to 400 µg/ml.</p>                                                                   |        |        |
| Comments and other relevant physical-chemical properties and material characterization information                                                                        |      |                                                                                                                                                                                                                                                                                  |        |        |
| Place, Date Karlsruhe, 06.03.2013                                                                                                                                         |      | Responsible H.-R. Paur, KIT                                                                                                                                                                                                                                                      |        |        |



|                                                                                                                                               |      |                                                                                                                                                                                                                                                                                   |        |        |
|-----------------------------------------------------------------------------------------------------------------------------------------------|------|-----------------------------------------------------------------------------------------------------------------------------------------------------------------------------------------------------------------------------------------------------------------------------------|--------|--------|
| Summary of trace analyses                                                                                                                     |      | ICP-MS / KIT                                                                                                                                                                                                                                                                      | Assay1 | Assay2 |
| Na                                                                                                                                            | µg/g |                                                                                                                                                                                                                                                                                   | 74.7   | 80.1   |
| Mg                                                                                                                                            | µg/g |                                                                                                                                                                                                                                                                                   | 21.4   | 20.8   |
| Al                                                                                                                                            | µg/g |                                                                                                                                                                                                                                                                                   | 5.0    | 6.6    |
| K                                                                                                                                             | µg/g |                                                                                                                                                                                                                                                                                   | 10.4   | 11.4   |
| Ca                                                                                                                                            | µg/g |                                                                                                                                                                                                                                                                                   | 135.5  | 137    |
| Ti                                                                                                                                            | µg/g |                                                                                                                                                                                                                                                                                   | 0.2    | 0.1    |
| Mn                                                                                                                                            | µg/g |                                                                                                                                                                                                                                                                                   | 0.3    | <0.2   |
| Fe                                                                                                                                            | µg/g |                                                                                                                                                                                                                                                                                   | 25.9   | 8.3    |
| Ni                                                                                                                                            | µg/g |                                                                                                                                                                                                                                                                                   | 2.5    | 0.5    |
| Cu                                                                                                                                            | µg/g |                                                                                                                                                                                                                                                                                   | 3.6    | 3.8    |
| Sr                                                                                                                                            | µg/g |                                                                                                                                                                                                                                                                                   | 60.4   | 61.2   |
| Cd                                                                                                                                            | µg/g |                                                                                                                                                                                                                                                                                   | 5.5    | 5.6    |
| Ba                                                                                                                                            | µg/g |                                                                                                                                                                                                                                                                                   | 0.2    | 0.2    |
| Tl                                                                                                                                            | µg/g |                                                                                                                                                                                                                                                                                   | 3.4    | 3.6    |
| Pb                                                                                                                                            | µg/g |                                                                                                                                                                                                                                                                                   | 18.7   | 19.7   |
| <b>Electron microscopy</b><br>Method / technical data of microscope:<br>SOP: See KIT (LEM)<br><br>Magnification: 450.000<br><br><br>UNIVLEEDS |      | <div></div> <p>Electron Microscopy by KIT (LEM); Diameter : 30-200 nm</p> <div></div> <p>ZnO NPs B 1-3</p> |        |        |
| Radical formation potential by DCF-Test:<br>(H <sub>2</sub> O <sub>2</sub> as positive control) (KIT)                                         |      | <div></div> <p>Result: ZnO_NP003 induced a moderate increase of DCFH oxidation at concentrations from 25 to 400 µg/ml.</p>                                                                    |        |        |
| Comments and other relevant physical-chemical properties and material characterization information                                            |      |                                                                                                                                                                                                                                                                                   |        |        |
| Place, Date Karlsruhe, 06.03.2013                                                                                                             |      | Responsible H.-R. Paur, KIT                                                                                                                                                                                                                                                       |        |        |

| <b>REPRESENTATIVE TEST PARTICLES</b><br>Nanomaterial Identification<br>according to OECD<br>ENV/JM/MONO(2009)20/REV pp29. |                                                |                                                                      |  Research Infrastructure<br><b>QualityNano</b>                                        |                                 |
|---------------------------------------------------------------------------------------------------------------------------|------------------------------------------------|----------------------------------------------------------------------|-------------------------------------------------------------------------------------------------------------------------------------------------------------------------|---------------------------------|
| Nanomaterial name                      ZnO NPs B 2-1<br>Particle Code                              ZnO_NP004              |                                                |                                                                      | <b>Manufacturer /Institute/Date</b><br>Yunhong Jiang; provided by Univleeds;    03/2012<br><b>Technology Expert:</b> Yunhong Jiang                                      |                                 |
| Composition                              ZnO<br>Method of production                      B2B Synthesis                   |                                                |                                                                      |                                                                                                                                                                         |                                 |
| <b>Kind of suspension:</b>                                                                                                |                                                |                                                                      | <b>Suspension</b> <input type="checkbox"/> <b>Powder</b> <input checked="" type="checkbox"/><br>Suspended in<br>pH                      _____<br>stabilizer <u>none</u> |                                 |
| <b>Property</b>                                                                                                           | <b>unit</b>                                    | <b>Method / Institute</b>                                            | <b>Value</b>                                                                                                                                                            |                                 |
| Agglomeration/aggregation                                                                                                 |                                                | HRTEM (KIT)                                                          | crystalline                                                                                                                                                             |                                 |
| Crystalline phase                                                                                                         |                                                | D5000 Diffractometer (UU)<br>PANalytical X'Pert diffractometer (ICN) | Amorphous<br>                                                                       |                                 |
| Crystallite size                                                                                                          |                                                | HRTEM (KIT)                                                          |                                                                                                                                                                         |                                 |
| Octanol-water partition coefficient                                                                                       |                                                | Extraction/ ICP-MS (ICN)                                             | P <sub>OW</sub> =0                                                                                                                                                      |                                 |
| Photocatalytic activity                                                                                                   |                                                | Rhodamin-B Bleaching/UV-B-100<br>10mg/ml in Water (ICN)              | high                                                                                                                                                                    |                                 |
| Porosity                                                                                                                  | -/- or %                                       | n.a.                                                                 |                                                                                                                                                                         |                                 |
| Pour density                                                                                                              | cm3/g                                          | (BJH) Pore Size Distribution and<br>Volume by ASAP2020 (UU)          | n.a.                                                                                                                                                                    |                                 |
| Size distribution:<br>(suspension in water)                                                                               | Modal value X <sub>M</sub> (PDI)               | nm                                                                   | Zetasizer Nano ZS /UCD<br><br>DCS (UCD) (RWtAv / RNumAv)                                                                                                                | 201.5 (PDI:0.212)/<br>NM: 117.8 |
|                                                                                                                           | Total concentration                            | mg/ml                                                                |                                                                                                                                                                         |                                 |
| Size distribution:<br>(Aerosol)                                                                                           | Modal value X <sub>M</sub> (σ <sub>geo</sub> ) | nm                                                                   | SMPS TSI, DMA 3071 with CPC<br>3022A / KIT<br>dispersed by electrospray                                                                                                 | n.a.                            |
| Solubility in _____                                                                                                       |                                                | g/l                                                                  |                                                                                                                                                                         |                                 |
| Solubility in H <sub>2</sub> O after 30 days                                                                              |                                                | mg/ml                                                                | Extraction/ ICP-MS (ICN)                                                                                                                                                | 5                               |
| Specific surface area                                                                                                     |                                                | cm <sup>2</sup> /g                                                   | BET by ASAP2020 (UU)                                                                                                                                                    | n.a.                            |
| Surface chemistry                                                                                                         |                                                |                                                                      |                                                                                                                                                                         |                                 |
| Zeta potential (surface charge)                                                                                           |                                                | eV                                                                   | Zetasizer Nano ZS (UU)                                                                                                                                                  | +23.0 ± 4.9 mV<br>pH: 6.23      |

|                                                                                                                                                               |      |                                                                                                                                                                                                                |      |
|---------------------------------------------------------------------------------------------------------------------------------------------------------------|------|----------------------------------------------------------------------------------------------------------------------------------------------------------------------------------------------------------------|------|
| Summary of trace analyses                                                                                                                                     |      | ICP-MS (KIT)                                                                                                                                                                                                   |      |
| Li                                                                                                                                                            | µg/g |                                                                                                                                                                                                                | 0.2  |
| Na                                                                                                                                                            | µg/g |                                                                                                                                                                                                                | 16.4 |
| Mg                                                                                                                                                            | µg/g |                                                                                                                                                                                                                | 5.5  |
| Al                                                                                                                                                            | µg/g |                                                                                                                                                                                                                | 5.5  |
| Ca                                                                                                                                                            | µg/g |                                                                                                                                                                                                                | 13.8 |
| Ti                                                                                                                                                            | µg/g |                                                                                                                                                                                                                | 3.2  |
| Mn                                                                                                                                                            | µg/g |                                                                                                                                                                                                                | 0.2  |
| Fe                                                                                                                                                            | µg/g |                                                                                                                                                                                                                | 35.4 |
| Ni                                                                                                                                                            | µg/g |                                                                                                                                                                                                                | 0.9  |
| Cu                                                                                                                                                            | µg/g |                                                                                                                                                                                                                | 2.8  |
| Sr                                                                                                                                                            | µg/g |                                                                                                                                                                                                                | 19.1 |
| Mo                                                                                                                                                            | µg/g |                                                                                                                                                                                                                | 1.1  |
| Cd                                                                                                                                                            | µg/g |                                                                                                                                                                                                                | 4.4  |
| Ba                                                                                                                                                            | µg/g |                                                                                                                                                                                                                | 0.2  |
| Tl                                                                                                                                                            | µg/g |                                                                                                                                                                                                                | 2.1  |
| Pb                                                                                                                                                            | µg/g |                                                                                                                                                                                                                | 32.5 |
| <b>Electron microscopy</b><br>Method / technical data of microscope:<br>SOP: See KIT (LEM)<br><br>Magnification: 450.000<br><br><br>UNIVLEEDS<br>TEM/ TEM-EDX |      | <div></div> <p>Electron Microscopy by KIT (LEM); Diameter : 30-200 nm</p> <p>ZnO NPs B 2-1</p>                              |      |
| Radical formation potential by DCF-Test:<br>(H <sub>2</sub> O <sub>2</sub> as positive control) (KIT)                                                         |      | <div></div> <p>Result: ZnO_NP004 induced a moderate increase of DCFH oxidation at concentrations from 25 to 400 µg/ml.</p> |      |
| Comments and other relevant physical-chemical properties and material characterisation information                                                            |      |                                                                                                                                                                                                                |      |
| Place, Date Karlsruhe, 29.11.2016                                                                                                                             |      | Responsible H.-R. Paur, KIT                                                                                                                                                                                    |      |

|                                                                                                                           |                                      |                                                                                                                                                                            |                                                                                     |                                                                                       |  |
|---------------------------------------------------------------------------------------------------------------------------|--------------------------------------|----------------------------------------------------------------------------------------------------------------------------------------------------------------------------|-------------------------------------------------------------------------------------|---------------------------------------------------------------------------------------|--|
| <b>REPRESENTATIVE TEST PARTICLES</b><br>Nanomaterial Identification<br>according to OECD<br>ENV/JM/MONO(2009)20/REV pp29. |                                      |                                                                                                                                                                            |                                                                                     |     |  |
| Nanomaterial name      ZnO NPs B 2-2<br>Particle Code            ZnO_NP005                                                |                                      | <b>Manufacturer /Institute/Date</b><br>Yunhong Jiang; provided by Univleeds; 03/2012<br><b>Technology Expert:</b> Yunhong Jiang                                            |                                                                                     |                                                                                       |  |
| Composition              ZnO<br>Method of production      B2B Synthesis                                                   |                                      |                                                                                                                                                                            |                                                                                     |                                                                                       |  |
| <b>Kind of suspension:</b>                                                                                                |                                      | <b>Suspension</b> <input type="checkbox"/> <b>Powder</b> <input checked="" type="checkbox"/><br>Suspended in _____<br>pH _____<br>stabilizer                    none _____ |                                                                                     |                                                                                       |  |
| <b>Property</b>                                                                                                           | <b>unit</b>                          | <b>Method / Institute</b>                                                                                                                                                  | <b>Value</b>                                                                        |                                                                                       |  |
| Agglomeration/aggregation                                                                                                 |                                      | HRTEM (KIT)                                                                                                                                                                | crystalline                                                                         |                                                                                       |  |
| Crystalline phase                                                                                                         |                                      | D5000 Diffractometer (UU)<br>PANalytical X'Pert diffractometer (ICN)                                                                                                       |  |                                                                                       |  |
| Crystallite size                                                                                                          |                                      | HRTEM (KIT)                                                                                                                                                                |                                                                                     |                                                                                       |  |
| Octanol-water partition coefficient                                                                                       |                                      | Extraction/ ICP-MS (ICN)                                                                                                                                                   | $P_{OW}=0$                                                                          |                                                                                       |  |
| Photocatalytic activity                                                                                                   |                                      | Rhodamin-B Bleaching/UV-B-100<br>10mg/ml in Water (ICN)                                                                                                                    | high                                                                                |                                                                                       |  |
| Porosity                                                                                                                  | -/- or %                             | n.a.                                                                                                                                                                       |                                                                                     |                                                                                       |  |
| Pour density                                                                                                              | cm3/g                                | (BJH) Pore Size Distribution and Volume by ASAP2020 (UU)                                                                                                                   |                                                                                     |                                                                                       |  |
| Size distribution:<br>(suspension in water)                                                                               | Modal value $X_M$ (PDI)              | nm                                                                                                                                                                         | Zetasizer Nano ZS /UCD<br><br>UNIVLEEDS<br><br>DCS (UCD) (RWtAv / RNumAv)           | 606,2 (PDI:0,308)/<br>NM: 117,8<br><br>511,8 (PDI:0,297)                              |  |
|                                                                                                                           | Total concentration                  | mg/ml                                                                                                                                                                      |                                                                                     | 1mg/ml                                                                                |  |
| Size distribution:<br>(Aerosol)                                                                                           | Modal value $X_M$ ( $\sigma_{geo}$ ) | nm                                                                                                                                                                         | SMPS TSI, DMA 3071 with CPC 3022A / KIT dispersed by electrospray                   |  |  |
| Solubility in _____                                                                                                       | g/l                                  |                                                                                                                                                                            |                                                                                     |                                                                                       |  |
| Solubility in H <sub>2</sub> O after 30 days                                                                              | mg/ml                                | Extraction/ ICP-MS (ICN)                                                                                                                                                   | 4.5                                                                                 |                                                                                       |  |
| Specific surface area                                                                                                     | cm <sup>2</sup> /g                   | BET by ASAP2020 (UU)                                                                                                                                                       |                                                                                     |                                                                                       |  |
| Surface chemistry                                                                                                         |                                      |                                                                                                                                                                            |                                                                                     |                                                                                       |  |
| Zeta potential (surface charge)                                                                                           | eV                                   | Zetasizer Nano ZS (UU)                                                                                                                                                     | +20.3 ± 4.2 mV<br>pH: 6.28                                                          |                                                                                       |  |

|                                                                                                                                               |                                                                                                                                                                                                                                                                                                                                                                                                                                                        |                             |        |
|-----------------------------------------------------------------------------------------------------------------------------------------------|--------------------------------------------------------------------------------------------------------------------------------------------------------------------------------------------------------------------------------------------------------------------------------------------------------------------------------------------------------------------------------------------------------------------------------------------------------|-----------------------------|--------|
| Summary of trace analyses                                                                                                                     |                                                                                                                                                                                                                                                                                                                                                                                                                                                        | ICP-MS (KIT)                |        |
| Na                                                                                                                                            | µg/g                                                                                                                                                                                                                                                                                                                                                                                                                                                   |                             | 16.3   |
| Mg                                                                                                                                            | µg/g                                                                                                                                                                                                                                                                                                                                                                                                                                                   |                             | 5.3    |
| Al                                                                                                                                            | µg/g                                                                                                                                                                                                                                                                                                                                                                                                                                                   |                             | 4.7    |
| Ca                                                                                                                                            | µg/g                                                                                                                                                                                                                                                                                                                                                                                                                                                   |                             | 14.5   |
| Ti                                                                                                                                            | µg/g                                                                                                                                                                                                                                                                                                                                                                                                                                                   |                             | 3.2    |
| Mn                                                                                                                                            | µg/g                                                                                                                                                                                                                                                                                                                                                                                                                                                   |                             | 10.4   |
| Fe                                                                                                                                            | µg/g                                                                                                                                                                                                                                                                                                                                                                                                                                                   |                             | 1080.0 |
| Ni                                                                                                                                            | µg/g                                                                                                                                                                                                                                                                                                                                                                                                                                                   |                             | 1.1    |
| Cu                                                                                                                                            | µg/g                                                                                                                                                                                                                                                                                                                                                                                                                                                   |                             | 3.0    |
| Sr                                                                                                                                            | µg/g                                                                                                                                                                                                                                                                                                                                                                                                                                                   |                             | 20.1   |
| Mo                                                                                                                                            | µg/g                                                                                                                                                                                                                                                                                                                                                                                                                                                   |                             | 1.2    |
| Cd                                                                                                                                            | µg/g                                                                                                                                                                                                                                                                                                                                                                                                                                                   |                             | 4.6    |
| Ba                                                                                                                                            | µg/g                                                                                                                                                                                                                                                                                                                                                                                                                                                   |                             | 0.2    |
| Tl                                                                                                                                            | µg/g                                                                                                                                                                                                                                                                                                                                                                                                                                                   |                             | 2.0    |
| Pb                                                                                                                                            | µg/g                                                                                                                                                                                                                                                                                                                                                                                                                                                   |                             | 35.1   |
| <b>Electron microscopy</b><br>Method / technical data of microscope:<br>SOP: See KIT (LEM)<br><br>Magnification: 450.000<br><br><br>UNIVLEEDS | <div></div> <p>Electron Microscopy by KIT (LEM); Diameter : 30-300 nm</p> <div></div> <p>ZnO NPs B 2-2</p> |                             |        |
| Radical formation potential by DCF-Test:<br>(H <sub>2</sub> O <sub>2</sub> as positive control) (KIT)                                         | <div></div> <p>Result: ZnO_NP005 induced a moderate increase of DCFH oxidation at concentrations from 25 to 400 µg/ml.</p>                                                                                                                                                                                                                                         |                             |        |
| Comments and other relevant physical-chemical properties and material characterization information                                            |                                                                                                                                                                                                                                                                                                                                                                                                                                                        |                             |        |
| Place, Date Karlsruhe, 06.03.2013                                                                                                             |                                                                                                                                                                                                                                                                                                                                                                                                                                                        | Responsible H.-R. Paur, KIT |        |

|                                                                                                                           |                                                |             |                                                                                                                                                                        |  |                                                                                                   |
|---------------------------------------------------------------------------------------------------------------------------|------------------------------------------------|-------------|------------------------------------------------------------------------------------------------------------------------------------------------------------------------|--|---------------------------------------------------------------------------------------------------|
| <b>REPRESENTATIVE TEST PARTICLES</b><br>Nanomaterial Identification<br>according to OECD<br>ENV/JM/MONO(2009)20/REV pp29. |                                                |             |  Research Infrastructure<br><b>QualityNano</b>                                       |  |                                                                                                   |
| Nanomaterial name                      ZnO NPs B 2-3<br>Particle Code                              ZnO_NP006              |                                                |             | <b>Manufacturer /Institute/Date</b><br>Yunhong Jiang; provided by Univleeds;    03/2012<br><b>Technology Expert:</b> Yunhong Jiang                                     |  |                                                                                                   |
| Composition                              ZnO<br>Method of production                      B2B Synthesis                   |                                                |             | <b>Suspension</b> <input type="checkbox"/> <b>Powder</b> <input checked="" type="checkbox"/><br>Suspended in _____<br>pH _____<br>stabilizer                      none |  |                                                                                                   |
| <b>Kind of suspension:</b>                                                                                                |                                                |             |                                                                                                                                                                        |  |                                                                                                   |
| <b>Property</b>                                                                                                           |                                                | <b>unit</b> | <b>Method / Institute</b>                                                                                                                                              |  | <b>Value</b>                                                                                      |
| Agglomeration/aggregation                                                                                                 |                                                |             | HRTEM (KIT)                                                                                                                                                            |  | crystalline                                                                                       |
| Crystalline phase                                                                                                         |                                                |             | D5000 Diffractometer (UU)<br>PANalytical X'Pert diffractometer (ICN)                                                                                                   |  | Amorphous<br> |
| Crystallite size                                                                                                          |                                                |             | HRTEM (KIT)                                                                                                                                                            |  |                                                                                                   |
| Octanol-water partition coefficient                                                                                       |                                                |             | Extraction/ ICP-MS (ICN)                                                                                                                                               |  | P <sub>OW</sub> =0                                                                                |
| Photocatalytic activity                                                                                                   |                                                |             | Rhodamin-B Bleaching/UV-B-100 10mg/ml in Water (ICN)                                                                                                                   |  | high                                                                                              |
| Porosity                                                                                                                  |                                                | -/- or %    | n.a.                                                                                                                                                                   |  |                                                                                                   |
| Pour density                                                                                                              |                                                | cm3/g       | (BJH) Pore Size Distribution and Volume by ASAP2020 (UU)                                                                                                               |  |                                                                                                   |
| Size distribution: (suspension in water)                                                                                  | Modal value X <sub>M</sub> (PDI)               | nm          | Zetasizer Nano ZS /UCD<br>UNIVLEEDS<br>DCS (UCD) (RWtAv / RNumAv)                                                                                                      |  | 675,2 (PDI:0,305)/<br>NM: 117,8<br>563,8 (PDI:0,432)                                              |
|                                                                                                                           | Total concentration                            | mg/ml       |                                                                                                                                                                        |  | 1mg/ml                                                                                            |
| Size distribution: (Aerosol)                                                                                              | Modal value X <sub>M</sub> (σ <sub>geo</sub> ) | nm          | SMPS TSI, DMA 3071 with CPC 3022A / KIT dispersed by electrospray                                                                                                      |  |              |
| Solubility in _____                                                                                                       |                                                | g/l         |                                                                                                                                                                        |  |                                                                                                   |
| Solubility in H <sub>2</sub> O after 30 days                                                                              |                                                | mg/ml       | Extraction/ ICP-MS (ICN)                                                                                                                                               |  | Ca.5                                                                                              |
| Specific surface area                                                                                                     |                                                | cm²/g       | BET by ASAP2020 (UU)                                                                                                                                                   |  |                                                                                                   |
| Surface chemistry                                                                                                         |                                                |             |                                                                                                                                                                        |  |                                                                                                   |
| Zeta potential (surface charge)                                                                                           |                                                | eV          | Zetasizer Nano ZS (UU)                                                                                                                                                 |  | +20.9 ± 3.6 mV<br>pH: 6.26                                                                        |

| Summary of trace analyses                                                                                                                     |                                                                                                                                                                                                                                                                                                                                                                                                                                          | ICP-MS (KIT)                | Assay1 | Assay2 |
|-----------------------------------------------------------------------------------------------------------------------------------------------|------------------------------------------------------------------------------------------------------------------------------------------------------------------------------------------------------------------------------------------------------------------------------------------------------------------------------------------------------------------------------------------------------------------------------------------|-----------------------------|--------|--------|
| Li                                                                                                                                            | µg/g                                                                                                                                                                                                                                                                                                                                                                                                                                     |                             | 0.4    | 0.2    |
| Na                                                                                                                                            | µg/g                                                                                                                                                                                                                                                                                                                                                                                                                                     |                             | 17.7   | 16.0   |
| Mg                                                                                                                                            | µg/g                                                                                                                                                                                                                                                                                                                                                                                                                                     |                             | 12.2   | 5.4    |
| Al                                                                                                                                            | µg/g                                                                                                                                                                                                                                                                                                                                                                                                                                     |                             | 8.7    | 4.8    |
| Ca                                                                                                                                            | µg/g                                                                                                                                                                                                                                                                                                                                                                                                                                     |                             | 16.8   | 15.2   |
| Ti                                                                                                                                            | µg/g                                                                                                                                                                                                                                                                                                                                                                                                                                     |                             | 3.9    | 2.9    |
| Mn                                                                                                                                            | µg/g                                                                                                                                                                                                                                                                                                                                                                                                                                     |                             |        | 0.2    |
| Fe                                                                                                                                            | µg/g                                                                                                                                                                                                                                                                                                                                                                                                                                     |                             | 36.6   | 34.8   |
| Ni                                                                                                                                            | µg/g                                                                                                                                                                                                                                                                                                                                                                                                                                     |                             | 1.0    | 1.0    |
| Cu                                                                                                                                            | µg/g                                                                                                                                                                                                                                                                                                                                                                                                                                     |                             | 2.8    | 2.9    |
| Sr                                                                                                                                            | µg/g                                                                                                                                                                                                                                                                                                                                                                                                                                     |                             | 20.8   | 20.2   |
| Mo                                                                                                                                            | µg/g                                                                                                                                                                                                                                                                                                                                                                                                                                     |                             | 1.1    | 1.1    |
| Cd                                                                                                                                            | µg/g                                                                                                                                                                                                                                                                                                                                                                                                                                     |                             | 4.5    | 4.6    |
| Ba                                                                                                                                            | µg/g                                                                                                                                                                                                                                                                                                                                                                                                                                     |                             | 0.2    | 0.2    |
| Tl                                                                                                                                            | µg/g                                                                                                                                                                                                                                                                                                                                                                                                                                     |                             | 2.2    | 2.3    |
| Pb                                                                                                                                            | µg/g                                                                                                                                                                                                                                                                                                                                                                                                                                     |                             | 35.0   | 34.2   |
| <b>Electron microscopy</b><br>Method / technical data of microscope:<br>SOP: See KIT (LEM)<br><br>Magnification: 450.000<br><br><br>UNIVLEEDS | <div><p>Electron Microscopy by KIT (LEM); Diameter : 30-200 nm</p><p>ZnO NPs B 2-3</p></div> |                             |        |        |
| Radical formation potential by DCF-Test:                                                                                                      | Not analyzed.                                                                                                                                                                                                                                                                                                                                                                                                                            |                             |        |        |
| Comments and other relevant physical-chemical properties and material characterization information                                            |                                                                                                                                                                                                                                                                                                                                                                                                                                          |                             |        |        |
| Place, Date Karlsruhe, 06.03.2013                                                                                                             |                                                                                                                                                                                                                                                                                                                                                                                                                                          | Responsible H.-R. Paur, KIT |        |        |

|                                                                                                                           |                                                |                    |                                                                                                                                                                                                                               |                                                                                                                                  |  |
|---------------------------------------------------------------------------------------------------------------------------|------------------------------------------------|--------------------|-------------------------------------------------------------------------------------------------------------------------------------------------------------------------------------------------------------------------------|----------------------------------------------------------------------------------------------------------------------------------|--|
| <b>REPRESENTATIVE TEST PARTICLES</b><br>Nanomaterial Identification<br>according to OECD<br>ENV/JM/MONO(2009)20/REV pp29. |                                                |                    |                                                                                                                                                                                                                               |  Research Infrastructure<br><b>QualityNano</b> |  |
| Nanomaterial name                      ZnO NPs B 3-1<br>Particle Code                              ZnO_NP007              |                                                |                    | <b>Manufacturer /Institute/Date</b><br>Yunhong Jiang; provided by Univleeds; 03/2012<br><b>Technology Expert:</b> Yunhong Jiang                                                                                               |                                                                                                                                  |  |
| Composition                              ZnO<br>Method of production                      B2B Synthesis                   |                                                |                    |                                                                                                                                                                                                                               |                                                                                                                                  |  |
| <b>Kind of suspension:</b>                                                                                                |                                                |                    | <b>Suspension</b> <input type="checkbox"/> <b>Powder</b> <input checked="" type="checkbox"/><br>Suspended in<br>pH                                              _____<br>stabilizer                                      none |                                                                                                                                  |  |
| <b>Property</b>                                                                                                           |                                                | <b>unit</b>        | <b>Method / Institute</b>                                                                                                                                                                                                     | <b>Value</b>                                                                                                                     |  |
| Agglomeration/aggregation                                                                                                 |                                                |                    | HRTEM (KIT)                                                                                                                                                                                                                   | crystalline                                                                                                                      |  |
| Crystalline phase                                                                                                         |                                                |                    | D5000 Diffractometer (UU)<br>PANalytical X'Pert diffractometer (ICN)                                                                                                                                                          |                                              |  |
| Crystallite size                                                                                                          |                                                |                    | HRTEM (KIT)                                                                                                                                                                                                                   |                                                                                                                                  |  |
| Octanol-water partition coefficient                                                                                       |                                                |                    | Extraction/ ICP-MS (ICN)                                                                                                                                                                                                      | P <sub>OW</sub> =0                                                                                                               |  |
| Photocatalytic activity                                                                                                   |                                                |                    | Rhodamin-B Bleaching/UV-B-100<br>10mg/ml in Water (ICN)                                                                                                                                                                       | high                                                                                                                             |  |
| Porosity                                                                                                                  |                                                | -/- or %           | n.a.                                                                                                                                                                                                                          |                                                                                                                                  |  |
| Pour density                                                                                                              |                                                | cm3/g              | (BJH) Pore Size Distribution and<br>Volume by ASAP2020 (UU)                                                                                                                                                                   |                                                                                                                                  |  |
| Size distribution:<br>(suspension in water)                                                                               | Modal value X <sub>M</sub> (PDI)               | nm                 | Zetasizer Nano ZS /UCD<br><br>UNIVLEEDS<br><br>DCS (UCD) (RWtAv / RNumAv)                                                                                                                                                     | 647.9 (PDI:0.313)/<br>NM: 445.7<br><br>131.0 PDI(:0.447)                                                                         |  |
|                                                                                                                           | Total concentration                            | mg/ml              |                                                                                                                                                                                                                               | 1mg/ml                                                                                                                           |  |
| Size distribution:<br>(Aerosol)                                                                                           | Modal value X <sub>M</sub> (σ <sub>geo</sub> ) | nm                 | SMPS TSI. DMA 3071 with CPC<br>3022A / KIT<br>dispersed by electrospray                                                                                                                                                       |                                                                                                                                  |  |
| Solubility in _____                                                                                                       |                                                | g/l                |                                                                                                                                                                                                                               |                                                                                                                                  |  |
| Solubility in H <sub>2</sub> O after 30 days                                                                              |                                                | mg/ml              | Extraction/ ICP-MS (ICN)                                                                                                                                                                                                      | 7.5                                                                                                                              |  |
| Specific surface area                                                                                                     |                                                | cm <sup>2</sup> /g | BET by ASAP2020 (UU)                                                                                                                                                                                                          |                                                                                                                                  |  |
| Surface chemistry                                                                                                         |                                                |                    |                                                                                                                                                                                                                               |                                                                                                                                  |  |
| Zeta potential (surface charge)                                                                                           |                                                | eV                 | Zetasizer Nano ZS /UU                                                                                                                                                                                                         | -5.9 ± 4.2 mV<br>pH: 6.28                                                                                                        |  |

|                                                                                                                                               |                                                                                                                                                                                                                                                                                 |                             |      |
|-----------------------------------------------------------------------------------------------------------------------------------------------|---------------------------------------------------------------------------------------------------------------------------------------------------------------------------------------------------------------------------------------------------------------------------------|-----------------------------|------|
| Summary of trace analyses                                                                                                                     |                                                                                                                                                                                                                                                                                 | ICP-MS / KIT                |      |
| Na                                                                                                                                            | µg/g                                                                                                                                                                                                                                                                            |                             | 27.3 |
| Al                                                                                                                                            | µg/g                                                                                                                                                                                                                                                                            |                             | 4.6  |
| Ca                                                                                                                                            | µg/g                                                                                                                                                                                                                                                                            |                             | 4.8  |
| Ti                                                                                                                                            | µg/g                                                                                                                                                                                                                                                                            |                             | 0.4  |
| Fe                                                                                                                                            | µg/g                                                                                                                                                                                                                                                                            |                             | 30.8 |
| Co                                                                                                                                            | µg/g                                                                                                                                                                                                                                                                            |                             | 0.3  |
| Ni                                                                                                                                            | µg/g                                                                                                                                                                                                                                                                            |                             | 6.6  |
| Cu                                                                                                                                            | µg/g                                                                                                                                                                                                                                                                            |                             | 2.4  |
| Cd                                                                                                                                            | µg/g                                                                                                                                                                                                                                                                            |                             | <0.1 |
| Pb                                                                                                                                            | µg/g                                                                                                                                                                                                                                                                            |                             | 4.9  |
| <b>Electron microscopy</b><br>Method / technical data of microscope:<br>SOP: See KIT (LEM)<br><br>Magnification: 450.000<br><br><br>UNIVLEEDS | <div></div> <p>Electron Microscopy by KIT (LEM); Diameter : 30-200 nm</p> <div></div> <p>ZnO NPs B 3-1</p> |                             |      |
| TEM EDX<br>UNIVLEEDS                                                                                                                          |                                                                                                                                                                                             |                             |      |
| Radical formation potential by DCF-Test:<br>(H <sub>2</sub> O <sub>2</sub> as positive control) (KIT)                                         | <div></div> <p>Result: ZnO_NP007 induced a moderate increase of DCFH oxidation at concentrations from 25 to 400 µg/ml.</p>                                                                  |                             |      |
| Comments and other relevant physical-chemical properties and material characterization information                                            |                                                                                                                                                                                                                                                                                 |                             |      |
| Place, Date Karlsruhe, 06.03.2013                                                                                                             |                                                                                                                                                                                                                                                                                 | Responsible H.-R. Paur, KIT |      |

| REPRESENTATIVE TEST PARTICLES                                                     |                                               |                                                                      |                                                                                                   | Research Infrastructure<br>QualityNano                                                       |  |
|-----------------------------------------------------------------------------------|-----------------------------------------------|----------------------------------------------------------------------|---------------------------------------------------------------------------------------------------|----------------------------------------------------------------------------------------------|--|
| Nanomaterial Identification<br>according to OECD<br>ENV/JM/MONO(2009)20/REV pp29. |                                               |                                                                      |                                                                                                   |                                                                                              |  |
| Nanomaterial name                                                                 |                                               | ZnO NPs B 3-2                                                        |                                                                                                   | <b>Manufacturer /Institute/Date</b>                                                          |  |
| Particle Code                                                                     |                                               | ZnO_NP008                                                            |                                                                                                   | Yunhong Jiang; provided by Univleeds; 03/2012                                                |  |
| Composition                                                                       |                                               | ZnO                                                                  |                                                                                                   | <b>Technology Expert:</b> Yunhong Jiang                                                      |  |
| Method of production                                                              |                                               | B2B Synthesis                                                        |                                                                                                   |                                                                                              |  |
| <b>Kind of suspension:</b>                                                        |                                               |                                                                      |                                                                                                   | <b>Suspension</b> <input type="checkbox"/> <b>Powder</b> <input checked="" type="checkbox"/> |  |
|                                                                                   |                                               |                                                                      |                                                                                                   | Suspended in _____                                                                           |  |
|                                                                                   |                                               |                                                                      |                                                                                                   | pH _____                                                                                     |  |
|                                                                                   |                                               |                                                                      |                                                                                                   | stabilizer <u>none</u>                                                                       |  |
| <b>Property</b>                                                                   | <b>unit</b>                                   | <b>Method / Institute</b>                                            | <b>Value</b>                                                                                      |                                                                                              |  |
| Agglomeration/aggregation                                                         |                                               | HRTEM (KIT)                                                          | crystalline                                                                                       |                                                                                              |  |
| Crystalline phase                                                                 |                                               | D5000 Diffractometer (UU)<br>PANalytical X'Pert diffractometer (ICN) | Amorphous<br> |                                                                                              |  |
| Crystallite size                                                                  |                                               | HRTEM (KIT)                                                          |                                                                                                   |                                                                                              |  |
| Octanol-water partition coefficient                                               |                                               | Extraction/ ICP-MS (ICN)                                             | P <sub>OW</sub> =0                                                                                |                                                                                              |  |
| Photocatalytic activity                                                           |                                               | Rhodamin-B Bleaching/UV-B-100<br>10mg/ml in Water (ICN)              | high                                                                                              |                                                                                              |  |
| Porosity                                                                          | -/- or %                                      | n.a.                                                                 |                                                                                                   |                                                                                              |  |
| Pour density                                                                      | cm3/g                                         | (BJH) Pore Size Distribution and Volume by ASAP2020 (UU)             |                                                                                                   |                                                                                              |  |
| Size distribution:<br>(suspension in water)                                       | Modal value X <sub>M</sub> (PDI)              | nm                                                                   | Zetasizer Nano ZS /UCD<br><br>UNIVLEEDS<br><br>DCS (UCD) (RWtAv / RNumAv)                         | 670.1 (PDI: 0.331)<br>/ NM: 343.6<br>130.2 (PDI: 0.492)                                      |  |
|                                                                                   | Total concentration                           | mg/ml                                                                |                                                                                                   | 1mg/ml                                                                                       |  |
| Size distribution:<br>(Aerosol)                                                   | Modal value X <sub>M</sub> ( $\sigma_{geo}$ ) | nm                                                                   | SMPS TSI, DMA 3071 with CPC 3022A / KIT<br>dispersed by electrospray                              |                                                                                              |  |
| Solubility in _____                                                               |                                               | g/l                                                                  |                                                                                                   |                                                                                              |  |
| Solubility in H <sub>2</sub> O after 30 days                                      |                                               | mg/ml                                                                | Extraction/ ICP-MS (ICN)                                                                          | 6.5                                                                                          |  |
| Specific surface area                                                             |                                               | cm²/g                                                                | BET by ASAP2020 (UU)                                                                              |                                                                                              |  |
| Surface chemistry                                                                 |                                               |                                                                      |                                                                                                   |                                                                                              |  |
| Zeta potential (surface charge)                                                   |                                               | eV                                                                   | Zetasizer Nano ZS /UU                                                                             | +24.3 ± 3.3 mV<br>pH: 6.43                                                                   |  |

|                                                                                                                                               |                                                                                                                                                                                                                |                             |      |
|-----------------------------------------------------------------------------------------------------------------------------------------------|----------------------------------------------------------------------------------------------------------------------------------------------------------------------------------------------------------------|-----------------------------|------|
| Summary of trace analyses                                                                                                                     |                                                                                                                                                                                                                | ICP-MS / KIT                |      |
| Na                                                                                                                                            | µg/g                                                                                                                                                                                                           |                             | 27.2 |
| Mg                                                                                                                                            | µg/g                                                                                                                                                                                                           |                             | 18.1 |
| Al                                                                                                                                            | µg/g                                                                                                                                                                                                           |                             | 7.3  |
| Ca                                                                                                                                            | µg/g                                                                                                                                                                                                           |                             | 3.7  |
| Ti                                                                                                                                            | µg/g                                                                                                                                                                                                           |                             | 0.4  |
| Fe                                                                                                                                            | µg/g                                                                                                                                                                                                           |                             | 30.7 |
| Co                                                                                                                                            | µg/g                                                                                                                                                                                                           |                             | 0.3  |
| Ni                                                                                                                                            | µg/g                                                                                                                                                                                                           |                             | 3.2  |
| Cu                                                                                                                                            | µg/g                                                                                                                                                                                                           |                             | 2.5  |
| Cd                                                                                                                                            | µg/g                                                                                                                                                                                                           |                             | <0.1 |
| Pb                                                                                                                                            | µg/g                                                                                                                                                                                                           |                             | 4.8  |
| <b>Electron microscopy</b><br>Method / technical data of microscope:<br>SOP: See KIT (LEM)<br><br>Magnification: 450.000<br><br><br>UNIVLEEDS | <div></div> <p>Electron Microscopy by KIT (LEM); Diameter : 30-200 nm</p> <p>ZnO NPs B 3-2</p>                              |                             |      |
| Radical formation potential by DCF-Test:<br>(H <sub>2</sub> O <sub>2</sub> as positive control) (KIT)                                         | <div></div> <p>Result: ZnO_NP008 induced a moderate increase of DCFH oxidation at concentrations from 25 to 400 µg/ml.</p> |                             |      |
| Comments and other relevant physical-chemical properties and material characterization information                                            |                                                                                                                                                                                                                |                             |      |
| Place, Date Karlsruhe, 06.03.2013                                                                                                             |                                                                                                                                                                                                                | Responsible H.-R. Paur, KIT |      |

| <b>REPRESENTATIVE TEST PARTICLES</b><br>Nanomaterial Identification<br>according to OECD<br>ENV/JM/MONO(2009)20/REV pp29. |                                                |                    |                                                                                                                                                                         |  Research Infrastructure<br><b>QualityNano</b> |  |
|---------------------------------------------------------------------------------------------------------------------------|------------------------------------------------|--------------------|-------------------------------------------------------------------------------------------------------------------------------------------------------------------------|----------------------------------------------------------------------------------------------------------------------------------|--|
| Nanomaterial name                      ZnO NPs B 3-3<br>Particle Code                              ZnO_NP009              |                                                |                    | <b>Manufacturer /Institute/Date</b><br>Yunhong Jiang; provided by Univleeds; 03/2012<br><b>Technology Expert:</b> Yunhong Jiang                                         |                                                                                                                                  |  |
| Composition                              ZnO<br>Method of production                      B2B Synthesis                   |                                                |                    | <b>Suspension</b> <input type="checkbox"/> <b>Powder</b> <input checked="" type="checkbox"/><br>Suspended in<br>pH                      _____<br>stabilizer <u>none</u> |                                                                                                                                  |  |
| <b>Kind of suspension:</b>                                                                                                |                                                |                    |                                                                                                                                                                         |                                                                                                                                  |  |
| <b>Property</b>                                                                                                           |                                                | <b>unit</b>        | <b>Method / Institute</b>                                                                                                                                               | <b>Value</b>                                                                                                                     |  |
| Agglomeration/aggregation                                                                                                 |                                                |                    | HRTEM (KIT)                                                                                                                                                             | crystalline                                                                                                                      |  |
| Crystalline phase                                                                                                         |                                                |                    | D5000 Diffractometer (UU)<br>PANalytical X'Pert diffractometer (ICN)                                                                                                    | Amorphous<br>                                |  |
| Crystallite size                                                                                                          |                                                |                    | HRTEM (KIT)                                                                                                                                                             |                                                                                                                                  |  |
| Octanol-water partition coefficient                                                                                       |                                                |                    | Extraction/ ICP-MS (ICN)                                                                                                                                                | P <sub>OW</sub> =0                                                                                                               |  |
| Photocatalytic activity                                                                                                   |                                                |                    | Rhodamin-B Bleaching/UV-B-100<br>10mg/ml in Water (ICN)                                                                                                                 | high                                                                                                                             |  |
| Porosity                                                                                                                  |                                                | -/- or %           | n.a.                                                                                                                                                                    |                                                                                                                                  |  |
| Pour density                                                                                                              |                                                | cm <sup>3</sup> /g | (BJH) Pore Size Distribution and<br>Volume by ASAP2020 (UU)                                                                                                             |                                                                                                                                  |  |
| Size distribution:<br>(suspension in water)                                                                               | Modal value X <sub>M</sub> (PDI)               | nm                 | Zetasizer Nano ZS /UCD<br><br>UNIVLEEDS<br><br>DCS (UCD) (RWtAv / RNumAv)                                                                                               | 657.7 (PDI:0.311)/<br>NM: 422.7<br>132.6 (PDI:0.573)                                                                             |  |
|                                                                                                                           | Total concentration                            | mg/ml              |                                                                                                                                                                         | 1mg/ml                                                                                                                           |  |
| Size distribution:<br>(Aerosol)                                                                                           | Modal value X <sub>M</sub> (σ <sub>geo</sub> ) | nm                 | SMPS TSI. DMA 3071 with CPC<br>3022A / KIT<br>dispersed by electrospray                                                                                                 |                                                                                                                                  |  |
| Solubility in _____                                                                                                       |                                                | g/l                |                                                                                                                                                                         |                                                                                                                                  |  |
| Solubility in H <sub>2</sub> O after 30 days                                                                              |                                                | mg/ml              | Extraction/ ICP-MS (ICN)                                                                                                                                                | 7.5                                                                                                                              |  |
| Specific surface area                                                                                                     |                                                | cm <sup>2</sup> /g | BET by ASAP2020 (UU)                                                                                                                                                    |                                                                                                                                  |  |
| Surface chemistry                                                                                                         |                                                |                    |                                                                                                                                                                         |                                                                                                                                  |  |
| Zeta potential (surface charge)                                                                                           |                                                | eV                 | Zetasizer Nano ZS /UU                                                                                                                                                   | +21.7 ± 3.6 mV<br>pH: 6.46                                                                                                       |  |

|                                                                                                                                               |                                                                                                                                                                                                                                                                                 |                             |      |
|-----------------------------------------------------------------------------------------------------------------------------------------------|---------------------------------------------------------------------------------------------------------------------------------------------------------------------------------------------------------------------------------------------------------------------------------|-----------------------------|------|
| Summary of trace analyses                                                                                                                     |                                                                                                                                                                                                                                                                                 | ICP-MS (KIT)                |      |
| Na                                                                                                                                            | µg/g                                                                                                                                                                                                                                                                            |                             | 29.3 |
| Al                                                                                                                                            | µg/g                                                                                                                                                                                                                                                                            |                             | 8.5  |
| Ca                                                                                                                                            | µg/g                                                                                                                                                                                                                                                                            |                             | 3.1  |
| Ti                                                                                                                                            | µg/g                                                                                                                                                                                                                                                                            |                             | 0.5  |
| Fe                                                                                                                                            | µg/g                                                                                                                                                                                                                                                                            |                             | 30.8 |
| Co                                                                                                                                            | µg/g                                                                                                                                                                                                                                                                            |                             | 0.3  |
| Ni                                                                                                                                            | µg/g                                                                                                                                                                                                                                                                            |                             | 5.3  |
| Cu                                                                                                                                            | µg/g                                                                                                                                                                                                                                                                            |                             | 2.7  |
| Cd                                                                                                                                            | µg/g                                                                                                                                                                                                                                                                            |                             | <0.1 |
| Pb                                                                                                                                            | µg/g                                                                                                                                                                                                                                                                            |                             | 6.4  |
| <b>Electron microscopy</b><br>Method / technical data of microscope:<br>SOP: See KIT (LEM)<br><br>Magnification: 450.000<br><br><br>UNIVLEEDS | <div></div> <p>Electron Microscopy by KIT (LEM); Diameter : 30-200 nm</p> <div></div> <p>ZnO NPs B 3-3</p> |                             |      |
| Radical formation potential by DCF-Test:<br>(H <sub>2</sub> O <sub>2</sub> as positive control) (KIT)                                         | <div></div> <p>Result: ZnO_NP009 induced a moderate increase of DCFH oxidation at concentrations from 25 to 400 µg/ml.</p>                                                                  |                             |      |
| Comments and other relevant physical-chemical properties and material characterization information                                            |                                                                                                                                                                                                                                                                                 |                             |      |
| Place, Date Karlsruhe, 06.03.2013                                                                                                             |                                                                                                                                                                                                                                                                                 | Responsible H.-R. Paur. KIT |      |

## Supplemental S5: Physicochemical characterization data sheets of titania NMs

| <b>REPRESENTATIVE TEST PARTICLES</b><br>Nanomaterial Identification<br>according to OECD<br>ENV/JM/MONO(2009)20/REV pp29. |                                                |                                                                         |  Research Infrastructure<br><b>QualityNano</b>                                                   |                                       |
|---------------------------------------------------------------------------------------------------------------------------|------------------------------------------------|-------------------------------------------------------------------------|------------------------------------------------------------------------------------------------------------------------------------------------------------------------------------|---------------------------------------|
| Nanomaterial name           TiO <sub>2</sub> -NP<br>Particle Code                TiO <sub>2</sub> NP_001                  |                                                |                                                                         | <b>Manufacturer /Institute/Date</b><br><b>Jordi Piella Bagaria; provided by ICN; 09/2012</b><br><br><b>Technology Expert:</b> Jordi Piella Bagaria                                 |                                       |
| Composition                TiO <sub>2</sub><br>Method of production       B2B Sol-Gel synthesis                           |                                                |                                                                         |                                                                                                                                                                                    |                                       |
| <b>Kind of suspension:</b>                                                                                                |                                                |                                                                         | <b>Suspension</b> <input checked="" type="checkbox"/> <b>Powder</b> <input type="checkbox"/><br><br>Suspended in <u>miliQ-water</u><br>pH <u>3</u><br>stabilizer <u>5 mM TMAOH</u> |                                       |
| Property                                                                                                                  | unit                                           | Method / Institute                                                      | Value                                                                                                                                                                              |                                       |
| Agglomeration/aggregation                                                                                                 |                                                | HRTEM (KIT)                                                             | Crystalline/<br>Agglomerated                                                                                                                                                       |                                       |
| Crystalline phase                                                                                                         |                                                | D5000 Diffractometer (UU)<br>PANalytical<br>X'Pert diffractometer (ICN) |                                                                                                |                                       |
| Crystallite size                                                                                                          |                                                | HRTEM (KIT)                                                             |                                                                                                                                                                                    |                                       |
| Octanol-water partition coefficient                                                                                       |                                                | Extraction/ ICP-MS (ICN)                                                | P <sub>OW</sub> =0                                                                                                                                                                 |                                       |
| Photocatalytic activity                                                                                                   |                                                | Rhodamin-B Bleaching/UV-B-100<br>10mg/ml in Water (ICN)                 | high                                                                                                                                                                               |                                       |
| Porosity                                                                                                                  | -/- or %                                       | n.a.                                                                    | n.a.                                                                                                                                                                               |                                       |
| Pour density                                                                                                              | cm <sup>3</sup> /g                             | (BJH) Pore Size Distribution and<br>Volume by ASAP2020 (UU)             | n.a.                                                                                                                                                                               |                                       |
| Size distribution:<br>(suspension in water)                                                                               | Modal value X <sub>M</sub> (PDI)               | nm                                                                      | Zetasizer Nano ZS /UCD<br>DCS (UCD) (RWtAv / RNumAv)                                                                                                                               | 59.08 (PDI:0.163)<br>0.0233/0.0230    |
|                                                                                                                           | Total concentration                            | mg/ml                                                                   |                                                                                                                                                                                    | 1mg/ml                                |
| Size distribution:<br>(Aerosol)                                                                                           | Modal value X <sub>M</sub> (σ <sub>geo</sub> ) | nm                                                                      | SMPS TSI, DMA 3071 with CPC<br>3022A (KIT)<br>dispersed by electrospray                                                                                                            | 36 (σ <sub>geo</sub> =1.23)           |
|                                                                                                                           | Total concentration                            | mg/cm <sup>3</sup> or #/cm <sup>3</sup>                                 |                                                                                                                                                                                    | 8.9x 10 <sup>3</sup> /cm <sup>3</sup> |
| Solubility in _____                                                                                                       | g/l                                            |                                                                         |                                                                                                                                                                                    |                                       |
| Solubility in H <sub>2</sub> O after 30 days                                                                              | mg/ml                                          | Extraction/ ICP-MS (ICN)                                                | none                                                                                                                                                                               |                                       |
| Specific surface area                                                                                                     | cm <sup>2</sup> /g                             | BET by ASAP2020 (UU)                                                    | n.a.                                                                                                                                                                               |                                       |
| Surface chemistry                                                                                                         |                                                |                                                                         |                                                                                                                                                                                    |                                       |
| Zeta potential (surface charge)                                                                                           | eV                                             | Zetasizer Nano ZS /UU                                                   | -40.4 ± 1.4 mV<br>pH (10.32)                                                                                                                                                       |                                       |

|                                                                                                                                                                              |                                                                                                                                                                                                                                                                                                                                                                    |                             |      |
|------------------------------------------------------------------------------------------------------------------------------------------------------------------------------|--------------------------------------------------------------------------------------------------------------------------------------------------------------------------------------------------------------------------------------------------------------------------------------------------------------------------------------------------------------------|-----------------------------|------|
| Summary of trace analyses                                                                                                                                                    |                                                                                                                                                                                                                                                                                                                                                                    | ICP-MS / KIT                |      |
| Ba                                                                                                                                                                           | µg/g                                                                                                                                                                                                                                                                                                                                                               |                             | 16   |
| Ca                                                                                                                                                                           | µg/g                                                                                                                                                                                                                                                                                                                                                               |                             | 215  |
| Fe                                                                                                                                                                           | µg/g                                                                                                                                                                                                                                                                                                                                                               |                             | 39   |
| K                                                                                                                                                                            | µg/g                                                                                                                                                                                                                                                                                                                                                               |                             | 710  |
| Mg                                                                                                                                                                           | µg/g                                                                                                                                                                                                                                                                                                                                                               |                             | 10   |
| Mn                                                                                                                                                                           | µg/g                                                                                                                                                                                                                                                                                                                                                               |                             | 0.7  |
| Na                                                                                                                                                                           | µg/g                                                                                                                                                                                                                                                                                                                                                               |                             | 7700 |
| Nb                                                                                                                                                                           | µg/g                                                                                                                                                                                                                                                                                                                                                               |                             | 1.3  |
| Ni                                                                                                                                                                           | µg/g                                                                                                                                                                                                                                                                                                                                                               |                             | 25   |
| Pb                                                                                                                                                                           | µg/g                                                                                                                                                                                                                                                                                                                                                               |                             | 0.1  |
| Sn                                                                                                                                                                           | µg/g                                                                                                                                                                                                                                                                                                                                                               |                             | 10   |
| Zn                                                                                                                                                                           | µg/g                                                                                                                                                                                                                                                                                                                                                               |                             | 144  |
| <b>Electron microscopy</b><br>Method / technical data of microscope:<br>SOP: See KIT (LEM)<br><br>magnification: 450.000<br><br><br>UNIVLEEDS<br>TEM/ SEM<br><br><br>SEM-EDX | <div></div> <p>Electron Microscopy by KIT (LEM); Diameter : 10 nm and smaller</p> <div></div> <div></div> |                             |      |
| Radical formation potential by DCF-Test:<br>(H <sub>2</sub> O <sub>2</sub> as positive control) (KIT)                                                                        | <div></div> <p>Result: TiO<sub>2</sub> NP_001 induced a low increase of DCFH oxidation at high concentration of 400 µg/ml (1.9 fold of nanoparticle free control).</p>                                                                                                         |                             |      |
| Comments and other relevant physical-chemical properties and material characterization information                                                                           |                                                                                                                                                                                                                                                                                                                                                                    |                             |      |
| Place, Date Karlsruhe, 29.11.2016                                                                                                                                            |                                                                                                                                                                                                                                                                                                                                                                    | Responsible H.-R. Paur, KIT |      |

| <b>REPRESENTATIVE TEST PARTICLES</b><br>Nanomaterial Identification<br>according to OECD<br>ENV/JM/MONO(2009)20/REV pp29. |                                      |                                                                                                                                                                                |  <b>QualityNano</b><br>Research Infrastructure |                                     |
|---------------------------------------------------------------------------------------------------------------------------|--------------------------------------|--------------------------------------------------------------------------------------------------------------------------------------------------------------------------------|----------------------------------------------------------------------------------------------------------------------------------|-------------------------------------|
| Nanomaterial name $\text{TiO}_2\text{-NP}$<br>Particle Code $\text{TiO}_2\text{NP\_002}$                                  |                                      | <b>Manufacturer /Institute/Date</b><br><b>Jordi Piella Bagaria; provided by ICN; 09/2012</b><br><b>Technology Expert:</b> Jordi Piella Bagaria                                 |                                                                                                                                  |                                     |
| Composition $\text{TiO}_2$<br>Method of production        B2B Sol-Gel synthesis                                           |                                      |                                                                                                                                                                                |                                                                                                                                  |                                     |
| <b>Kind of suspension:</b>                                                                                                |                                      | <b>Suspension</b> <input checked="" type="checkbox"/> <b>Powder</b> <input type="checkbox"/><br>Suspended in <u>miliQ-water</u><br>pH <u>3</u><br>stabilizer <u>5 mM TMAOH</u> |                                                                                                                                  |                                     |
| Property                                                                                                                  | unit                                 | Method / Institute                                                                                                                                                             | Value                                                                                                                            |                                     |
| Agglomeration/aggregation                                                                                                 |                                      | HRTEM (KIT)                                                                                                                                                                    | Agglomerated /crystalline                                                                                                        |                                     |
| Crystalline phase                                                                                                         |                                      | D5000 Diffractometer (UU)<br>PANalytical X'Pert diffractometer (ICN)                                                                                                           |                                              |                                     |
| Crystallite size                                                                                                          |                                      | HRTEM (KIT)                                                                                                                                                                    |                                                                                                                                  |                                     |
| Octanol-water partition coefficient                                                                                       |                                      | Extraction/ ICP-MS (ICN)                                                                                                                                                       | $P_{OW}=0$                                                                                                                       |                                     |
| Photocatalytic activity                                                                                                   |                                      | Rhodamin-B Bleaching/UV-B-100<br>10mg/ml in Water (ICN)                                                                                                                        | high                                                                                                                             |                                     |
| Porosity                                                                                                                  | -/- or %                             | n.a.                                                                                                                                                                           | n.a.                                                                                                                             |                                     |
| Pour density                                                                                                              | cm <sup>3</sup> /g                   | (BJH) Pore Size Distribution and Volume by ASAP2020 (UU)                                                                                                                       | n.a.                                                                                                                             |                                     |
| Size distribution:<br>(suspension in water)                                                                               | Modal value $X_M$ (PDI)              | nm                                                                                                                                                                             | Zetasizer Nano ZS /UCD<br>DCS (UCD) (RWtAv / RNumAv)                                                                             | 61.63 (PDI: 0.157)<br>0.0236/0.0233 |
|                                                                                                                           | Total concentration                  | mg/ml                                                                                                                                                                          |                                                                                                                                  | 1mg/ml                              |
| Size distribution:<br>(Aerosol)                                                                                           | Modal value $X_M$ ( $\sigma_{geo}$ ) | nm                                                                                                                                                                             | SMPS TSI, DMA 3071 with CPC 3022A / KIT<br>dispersed by electrospray                                                             | 33.5 ( $\sigma_{geo}=1.32$ )        |
|                                                                                                                           | Total concentration                  | mg/cm <sup>3</sup> or #/cm <sup>3</sup>                                                                                                                                        |                                                                                                                                  | $1.2 \times 10^4/\text{cm}^3$       |
| Solubility in _____                                                                                                       | g/l                                  |                                                                                                                                                                                |                                                                                                                                  |                                     |
| Solubility in H <sub>2</sub> O after 30 days                                                                              | mg/ml                                | Extraction/ ICP-MS (ICN)                                                                                                                                                       | none                                                                                                                             |                                     |
| Specific surface area                                                                                                     | cm <sup>2</sup> /g                   | BET by ASAP2020 (UU)                                                                                                                                                           | n.a.                                                                                                                             |                                     |
| Surface chemistry                                                                                                         |                                      |                                                                                                                                                                                |                                                                                                                                  |                                     |
| Zeta potential (surface charge)                                                                                           | eV                                   | Zetasizer Nano ZS /UU                                                                                                                                                          | $-43.0 \pm 0.4$ mV<br>pH(10.27)                                                                                                  |                                     |

|                                                                                                                                                                              |      |                                                                                                                                                                                                                                                                  |     |
|------------------------------------------------------------------------------------------------------------------------------------------------------------------------------|------|------------------------------------------------------------------------------------------------------------------------------------------------------------------------------------------------------------------------------------------------------------------|-----|
| Summary of trace analyses                                                                                                                                                    |      | ICP-MS / KIT                                                                                                                                                                                                                                                     |     |
| Ba                                                                                                                                                                           | µg/g |                                                                                                                                                                                                                                                                  | 14  |
| Ca                                                                                                                                                                           | µg/g |                                                                                                                                                                                                                                                                  | 68  |
| Cd                                                                                                                                                                           | µg/g |                                                                                                                                                                                                                                                                  | 0.2 |
| K                                                                                                                                                                            | µg/g |                                                                                                                                                                                                                                                                  | 23  |
| Mg                                                                                                                                                                           | µg/g |                                                                                                                                                                                                                                                                  | 2.8 |
| Na                                                                                                                                                                           | µg/g |                                                                                                                                                                                                                                                                  | 101 |
| Nb                                                                                                                                                                           | µg/g |                                                                                                                                                                                                                                                                  | 1.1 |
| Pb                                                                                                                                                                           | µg/g |                                                                                                                                                                                                                                                                  | 0.5 |
| Sn                                                                                                                                                                           | µg/g |                                                                                                                                                                                                                                                                  | 10  |
| V                                                                                                                                                                            | µg/g |                                                                                                                                                                                                                                                                  | 5   |
| Zn                                                                                                                                                                           | µg/g |                                                                                                                                                                                                                                                                  | 7.7 |
| <b>Electron microscopy</b><br>Method / technical data of microscope:<br>SOP: See KIT (LEM)<br><br>Magnification: 450.000<br><br><br>UNIVLEEDS<br>TEM/ SEM<br><br><br>SEM-EDX |      | <div></div> <p>Electron Microscopy by KIT (LEM); Diameter : 10nm or smaller</p> <div></div> |     |
| Radical formation potential by DCF-Test:<br>(H <sub>2</sub> O <sub>2</sub> as positive control) (KIT)                                                                        |      | <div></div> <p>Result: TiO<sub>2</sub> NP_002 induced a low increase of DCFH oxidation at high concentration of 400 µg/ml (1.6 fold of nanoparticle free control).</p>       |     |
| Comments and other relevant physical-chemical properties and material characterization information                                                                           |      |                                                                                                                                                                                                                                                                  |     |
| Place, Date Karlsruhe, 29.11.2016                                                                                                                                            |      | Responsible H.-R. Paur, KIT                                                                                                                                                                                                                                      |     |

|                                                                                                                           |                                      |                                                                                                                                                                                |                                                                                     |                                    |
|---------------------------------------------------------------------------------------------------------------------------|--------------------------------------|--------------------------------------------------------------------------------------------------------------------------------------------------------------------------------|-------------------------------------------------------------------------------------|------------------------------------|
| <b>REPRESENTATIVE TEST PARTICLES</b><br>Nanomaterial Identification<br>according to OECD<br>ENV/JM/MONO(2009)20/REV pp29. |                                      |                                                                                                                                                                                |   |                                    |
| Nanomaterial name $\text{TiO}_2\text{-NP}$<br>Particle Code $\text{TiO}_2\text{NP\_003}$                                  |                                      | <b>Manufacturer /Institute/Date</b><br><b>Jordi Piella Bagaria; provided by ICN; 09/2012</b><br><b>Technology Expert:</b> Jordi Piella Bagaria                                 |                                                                                     |                                    |
| Composition $\text{TiO}_2$<br>Method of production    B2B Sol-Gel synthesis                                               |                                      |                                                                                                                                                                                |                                                                                     |                                    |
| <b>Kind of suspension:</b>                                                                                                |                                      | <b>Suspension</b> <input checked="" type="checkbox"/> <b>Powder</b> <input type="checkbox"/><br>Suspended in <u>miliQ-water</u><br>pH <u>5</u><br>stabilizer <u>5 mM TMAOH</u> |                                                                                     |                                    |
| <b>Property</b>                                                                                                           | <b>unit</b>                          | <b>Method / Institute</b>                                                                                                                                                      | <b>Value</b>                                                                        |                                    |
| Agglomeration/aggregation                                                                                                 |                                      | HRTEM (KIT)                                                                                                                                                                    | Agglomerated /crystalline                                                           |                                    |
| Crystalline phase                                                                                                         |                                      | D5000 Diffractometer (UU)<br>PANalytical X'Pert diffractometer (ICN)                                                                                                           |  |                                    |
| Crystallite size                                                                                                          |                                      | HRTEM (KIT)                                                                                                                                                                    | n.a.                                                                                |                                    |
| Octanol-water partition coefficient                                                                                       |                                      | Extraction/ ICP-MS (ICN)                                                                                                                                                       | $P_{OW}=0$                                                                          |                                    |
| Photocatalytic activity                                                                                                   |                                      | Rhodamin-B Bleaching/UV-B-100<br>10mg/ml in Water (ICN)                                                                                                                        | high                                                                                |                                    |
| Porosity                                                                                                                  | -/- or %                             | n.a.                                                                                                                                                                           | n.a.                                                                                |                                    |
| Pour density                                                                                                              | cm <sup>3</sup> /g                   | (BJH) Pore Size Distribution and Volume by ASAP2020 (UU)                                                                                                                       | n.a.                                                                                |                                    |
| Size distribution:<br>(suspension in water)                                                                               | Modal value $X_M$ (PDI)              | nm                                                                                                                                                                             | Zetasizer Nano ZS /UCD<br>DCS (UCD) (RWtAv / RNumAv)                                | 115.6 (PDI:0.174)<br>0.0390/0.0325 |
|                                                                                                                           | Total concentration                  | mg/ml                                                                                                                                                                          |                                                                                     | 1mg/ml                             |
| Size distribution:<br>(Aerosol)                                                                                           | Modal value $X_M$ ( $\sigma_{geo}$ ) | nm                                                                                                                                                                             | SMPS TSI, DMA 3071 with CPC 3022A / KIT<br>dispersed by electrospray                | 42.9 ( $\sigma_{geo}=1.5$ )        |
|                                                                                                                           | Total concentration                  | mg/cm <sup>3</sup> or #/cm <sup>3</sup>                                                                                                                                        |                                                                                     | $1.0 \times 10^4/\text{cm}^3$      |
| Solubility in _____                                                                                                       | g/l                                  |                                                                                                                                                                                |                                                                                     |                                    |
| Solubility in H <sub>2</sub> O after 30 days                                                                              | mg/ml                                | Extraction/ ICP-MS (ICN)                                                                                                                                                       | none                                                                                |                                    |
| Specific surface area                                                                                                     | cm <sup>2</sup> /g                   | BET by ASAP2020 (UU)                                                                                                                                                           | n.a.                                                                                |                                    |
| Surface chemistry                                                                                                         |                                      |                                                                                                                                                                                |                                                                                     |                                    |
| Zeta potential (surface charge)                                                                                           | eV                                   | Zetasizer Nano ZS /UU                                                                                                                                                          | -39.6 ± 0.8 mV<br>pH(9.63)                                                          |                                    |

|                                                                                                                                                                              |      |                                                                                                                                                                                                                                                                                              |      |
|------------------------------------------------------------------------------------------------------------------------------------------------------------------------------|------|----------------------------------------------------------------------------------------------------------------------------------------------------------------------------------------------------------------------------------------------------------------------------------------------|------|
| Summary of trace analyses                                                                                                                                                    |      | ICP-MS / KIT                                                                                                                                                                                                                                                                                 |      |
| Ba                                                                                                                                                                           | µg/g |                                                                                                                                                                                                                                                                                              | 12   |
| Ca                                                                                                                                                                           | µg/g |                                                                                                                                                                                                                                                                                              | 39   |
| K                                                                                                                                                                            | µg/g |                                                                                                                                                                                                                                                                                              | 24   |
| Mg                                                                                                                                                                           | µg/g |                                                                                                                                                                                                                                                                                              | 3.0  |
| Na                                                                                                                                                                           | µg/g |                                                                                                                                                                                                                                                                                              | 7700 |
| Nb                                                                                                                                                                           | µg/g |                                                                                                                                                                                                                                                                                              | 1.3  |
| Ni                                                                                                                                                                           | µg/g |                                                                                                                                                                                                                                                                                              | 1.8  |
| Sn                                                                                                                                                                           | µg/g |                                                                                                                                                                                                                                                                                              | 10   |
| Zn                                                                                                                                                                           | µg/g |                                                                                                                                                                                                                                                                                              | 9.8  |
| <b>Electron microscopy</b><br>Method / technical data of microscope:<br>SOP: See KIT (LEM)<br><br>Magnification: 450.000<br><br><br>UNIVLEEDS<br>TEM/ SEM<br><br><br>SEM-EDX |      | <div></div> <div></div> <div></div> |      |
| Radical formation potential by DCF-Test:<br>(H <sub>2</sub> O <sub>2</sub> as positive control) (KIT)                                                                        |      | <div></div> <div>Result: TiO<sub>2</sub> NP_003 induced a low increase of DCFH oxidation at high concentration of 400 µg/ml (2.0 fold of nanoparticle free control).</div>                               |      |
| Comments and other relevant physical-chemical properties and material characterization information                                                                           |      |                                                                                                                                                                                                                                                                                              |      |
| Place, Date Karlsruhe, 29.11.2016                                                                                                                                            |      | Responsible H.-R. Paur, KIT                                                                                                                                                                                                                                                                  |      |

|                                                                                                                           |                                      |                                                                                                                                                                                |                                                                                      |                                    |
|---------------------------------------------------------------------------------------------------------------------------|--------------------------------------|--------------------------------------------------------------------------------------------------------------------------------------------------------------------------------|--------------------------------------------------------------------------------------|------------------------------------|
| <b>REPRESENTATIVE TEST PARTICLES</b><br>Nanomaterial Identification<br>according to OECD<br>ENV/JM/MONO(2009)20/REV pp29. |                                      |                                                                                                                                                                                |    |                                    |
| Nanomaterial name $\text{TiO}_2\text{-NP}$<br>Particle Code $\text{TiO}_2\text{NP\_004}$                                  |                                      | <b>Manufacturer /Institute/Date</b><br><b>Jordi Piella Bagaria; provided by ICN; 09/2012</b><br><b>Technology Expert:</b> Jordi Piella Bagaria                                 |                                                                                      |                                    |
| Composition $\text{TiO}_2$<br>Method of production      B2B Sol-Gel synthesis                                             |                                      |                                                                                                                                                                                |                                                                                      |                                    |
| <b>Kind of suspension:</b>                                                                                                |                                      | <b>Suspension</b> <input checked="" type="checkbox"/> <b>Powder</b> <input type="checkbox"/><br>Suspended in <u>miliQ-water</u><br>pH <u>5</u><br>stabilizer <u>5 mM TMAOH</u> |                                                                                      |                                    |
| <b>Property</b>                                                                                                           | <b>unit</b>                          | <b>Method / Institute</b>                                                                                                                                                      | <b>Value</b>                                                                         |                                    |
| Agglomeration/aggregation                                                                                                 |                                      | HRTEM (KIT)                                                                                                                                                                    | Agglomerated/ crystalline                                                            |                                    |
| Crystalline phase                                                                                                         |                                      | D5000 Diffractometer (UU)<br>PANalytical X'Pert diffractometer (ICN)                                                                                                           |  |                                    |
| Crystallite size                                                                                                          |                                      | HRTEM (KIT)                                                                                                                                                                    |                                                                                      |                                    |
| Octanol-water partition coefficient                                                                                       |                                      | Extraction/ ICP-MS (ICN)                                                                                                                                                       | $P_{OW}=0$                                                                           |                                    |
| Photocatalytic activity                                                                                                   |                                      | Rhodamin-B Bleaching/UV-B-100<br>10mg/ml in Water (ICN)                                                                                                                        | high                                                                                 |                                    |
| Porosity                                                                                                                  | -/- or %                             | n.a.                                                                                                                                                                           | n.a.                                                                                 |                                    |
| Pour density                                                                                                              | cm <sup>3</sup> /g                   | (BJH) Pore Size Distribution and Volume by ASAP2020 (UU)                                                                                                                       | n.a.                                                                                 |                                    |
| Size distribution:<br>(suspension in water)                                                                               | Modal value $X_M$ (PDI)              | nm                                                                                                                                                                             | Zetasizer Nano ZS /UCD<br>DCS (UCD) (RWtAv / RNumAv)                                 | 105.1 (PDI:0.171)<br>0.0366/0.0315 |
|                                                                                                                           | Total concentration                  | mg/ml                                                                                                                                                                          |                                                                                      | 1mg/ml                             |
| Size distribution:<br>(Aerosol)                                                                                           | Modal value $X_M$ ( $\sigma_{geo}$ ) | nm                                                                                                                                                                             | SMPS TSI, DMA 3071 with CPC 3022A / KIT<br>dispersed by electrospray                 | 50 ( $\sigma_{geo}=1.3$ )          |
|                                                                                                                           | Total concentration                  | mg/cm <sup>3</sup> or #/cm <sup>3</sup>                                                                                                                                        |                                                                                      | $5.5 \times 10^3/\text{cm}^3$      |
| Solubility in _____                                                                                                       | g/l                                  |                                                                                                                                                                                |                                                                                      |                                    |
| Solubility in H <sub>2</sub> O after 30 days                                                                              | mg/ml                                | Extraction/ ICP-MS (ICN)                                                                                                                                                       | none                                                                                 |                                    |
| Specific surface area                                                                                                     | cm <sup>2</sup> /g                   | BET by ASAP2020 (UU)                                                                                                                                                           | n.a.                                                                                 |                                    |
| Surface chemistry                                                                                                         |                                      |                                                                                                                                                                                |                                                                                      |                                    |
| Zeta potential (surface charge)                                                                                           | eV                                   | Zetasizer Nano ZS /UU                                                                                                                                                          | -40.0 ± 0.2 mV<br>pH(9.93)                                                           |                                    |

|                                                                                                                                                                              |      |                                                                                                                                                                                                                                                                |      |
|------------------------------------------------------------------------------------------------------------------------------------------------------------------------------|------|----------------------------------------------------------------------------------------------------------------------------------------------------------------------------------------------------------------------------------------------------------------|------|
| Summary of trace analyses                                                                                                                                                    |      | ICP-MS / KIT                                                                                                                                                                                                                                                   |      |
| Ba                                                                                                                                                                           | µg/g |                                                                                                                                                                                                                                                                | 15   |
| Ca                                                                                                                                                                           | µg/g |                                                                                                                                                                                                                                                                | 30   |
| Fe                                                                                                                                                                           | µg/g |                                                                                                                                                                                                                                                                | 6    |
| K                                                                                                                                                                            | µg/g |                                                                                                                                                                                                                                                                | 25   |
| Mg                                                                                                                                                                           | µg/g |                                                                                                                                                                                                                                                                | 1.8  |
| Na                                                                                                                                                                           | µg/g |                                                                                                                                                                                                                                                                | 6100 |
| Nb                                                                                                                                                                           | µg/g |                                                                                                                                                                                                                                                                | 1.2  |
| Ni                                                                                                                                                                           | µg/g |                                                                                                                                                                                                                                                                | 3.2  |
| Pb                                                                                                                                                                           | µg/g |                                                                                                                                                                                                                                                                | 0.1  |
| Sn                                                                                                                                                                           | µg/g |                                                                                                                                                                                                                                                                | 9    |
| Zn                                                                                                                                                                           | µg/g |                                                                                                                                                                                                                                                                | 8.0  |
| <b>Electron microscopy</b><br>Method / technical data of microscope:<br>SOP: See KIT (LEM)<br><br>Magnification: 450.000<br><br><br>UNIVLEEDS<br>TEM/ SEM<br><br><br>SEM-EDX |      | <div></div> <div></div>                                                                   |      |
| Radical formation potential by DCF-Test:<br>(H <sub>2</sub> O <sub>2</sub> as positive control) (KIT)                                                                        |      | <div></div> <div>Result: TiO<sub>2</sub> NP_004 induced a low increase of DCFH oxidation at high concentration of 400 µg/ml (2.0 fold of nanoparticle free control).</div> |      |
| Comments and other relevant physical-chemical properties and material characterization information                                                                           |      |                                                                                                                                                                                                                                                                |      |
| Place, Date Karlsruhe, 29.11.2016                                                                                                                                            |      | Responsible H.-R. Paur, KIT                                                                                                                                                                                                                                    |      |

| <b>REPRESENTATIVE TEST PARTICLES</b><br>Nanomaterial Identification<br>according to OECD<br>ENV/JM/MONO(2009)20/REV pp29. |                                      |                                                                                                                                                                                    |                                                                                      |  Research Infrastructure<br><b>QualityNano</b> |  |
|---------------------------------------------------------------------------------------------------------------------------|--------------------------------------|------------------------------------------------------------------------------------------------------------------------------------------------------------------------------------|--------------------------------------------------------------------------------------|----------------------------------------------------------------------------------------------------------------------------------|--|
| Nanomaterial name $\text{TiO}_2\text{-NP}$<br>Particle Code $\text{TiO}_2\text{NP\_005}$                                  |                                      | <b>Manufacturer /Institute/Date</b><br><b>Jordi Piella Bagaria; provided by ICN; 09/2012</b><br><br><b>Technology Expert:</b> Jordi Piella Bagaria                                 |                                                                                      |                                                                                                                                  |  |
| Composition $\text{TiO}_2$<br>Method of production        B2B Sol-Gel synthesis                                           |                                      |                                                                                                                                                                                    |                                                                                      |                                                                                                                                  |  |
| <b>Kind of suspension:</b>                                                                                                |                                      | <b>Suspension</b> <input checked="" type="checkbox"/> <b>Powder</b> <input type="checkbox"/><br><br>Suspended in <u>miliQ-water</u><br>pH <u>5</u><br>stabilizer <u>5 mM TMAOH</u> |                                                                                      |                                                                                                                                  |  |
| Property                                                                                                                  | unit                                 | Method / Institute                                                                                                                                                                 | Value                                                                                |                                                                                                                                  |  |
| Agglomeration/aggregation                                                                                                 |                                      | HRTEM (KIT)                                                                                                                                                                        | Agglomerated/ crystalline                                                            |                                                                                                                                  |  |
| Crystalline phase                                                                                                         |                                      | D5000 Diffractometer (UU)<br>PANalytical X'Pert diffractometer (ICN)                                                                                                               |  |                                                                                                                                  |  |
| Crystallite size                                                                                                          |                                      | HRTEM (KIT)                                                                                                                                                                        |                                                                                      |                                                                                                                                  |  |
| Octanol-water partition coefficient                                                                                       |                                      | Extraction/ ICP-MS (ICN)                                                                                                                                                           | $P_{OW}=0$                                                                           |                                                                                                                                  |  |
| Photocatalytic activity                                                                                                   |                                      | Rhodamin-B Bleaching/UV-B-100<br>10mg/ml in Water (ICN)                                                                                                                            | high                                                                                 |                                                                                                                                  |  |
| Porosity                                                                                                                  | -/- or %                             | n.a.                                                                                                                                                                               | n.a.                                                                                 |                                                                                                                                  |  |
| Pour density                                                                                                              | cm <sup>3</sup> /g                   | (BJH) Pore Size Distribution and Volume by ASAP2020 (UU)                                                                                                                           | n.a.                                                                                 |                                                                                                                                  |  |
| Size distribution:<br>(suspension in water)                                                                               | Modal value $X_M$ (PDI)              | nm                                                                                                                                                                                 | Zetasizer Nano ZS /UCD<br>DCS (UCD) (RWtAv / RNumAv)                                 | 151.1 (PDI: 0.214)<br>0.0499/0.0370                                                                                              |  |
|                                                                                                                           | Total concentration                  | mg/ml                                                                                                                                                                              |                                                                                      | 1mg/ml                                                                                                                           |  |
| Size distribution:<br>(Aerosol)                                                                                           | Modal value $X_M$ ( $\sigma_{geo}$ ) | nm                                                                                                                                                                                 | SMPS TSI, DMA 3071 with CPC 3022A / KIT<br>dispersed by electrospray                 | 43.5 ( $\sigma_{geo}=1.39$ )                                                                                                     |  |
|                                                                                                                           | Total concentration                  | mg/cm <sup>3</sup> or #/cm <sup>3</sup>                                                                                                                                            |                                                                                      | $2.0 \times 10^4/\text{cm}^3$                                                                                                    |  |
| Solubility in _____                                                                                                       | g/l                                  |                                                                                                                                                                                    |                                                                                      |                                                                                                                                  |  |
| Solubility in H <sub>2</sub> O after 30 days                                                                              | mg/ml                                | Extraction/ ICP-MS (ICN)                                                                                                                                                           | none                                                                                 |                                                                                                                                  |  |
| Specific surface area                                                                                                     | cm <sup>2</sup> /g                   | BET by ASAP2020 (UU)                                                                                                                                                               | n.a.                                                                                 |                                                                                                                                  |  |
| Surface chemistry                                                                                                         |                                      |                                                                                                                                                                                    |                                                                                      |                                                                                                                                  |  |
| Zeta potential (surface charge)                                                                                           | eV                                   | Zetasizer Nano ZS /UU                                                                                                                                                              | $-36.9 \pm 0.5$ mV<br>pH(10.28)                                                      |                                                                                                                                  |  |

|                                                                                                                                                                              |      |                                                                                                                                                                                                                                                                                                                                 |      |
|------------------------------------------------------------------------------------------------------------------------------------------------------------------------------|------|---------------------------------------------------------------------------------------------------------------------------------------------------------------------------------------------------------------------------------------------------------------------------------------------------------------------------------|------|
| Summary of trace analyses                                                                                                                                                    |      | ICP-MS / KIT                                                                                                                                                                                                                                                                                                                    |      |
| Ba                                                                                                                                                                           | µg/g |                                                                                                                                                                                                                                                                                                                                 | 17   |
| Ca                                                                                                                                                                           | µg/g |                                                                                                                                                                                                                                                                                                                                 | 39   |
| Co                                                                                                                                                                           | µg/g |                                                                                                                                                                                                                                                                                                                                 | 0.5  |
| Fe                                                                                                                                                                           | µg/g |                                                                                                                                                                                                                                                                                                                                 | 11   |
| K                                                                                                                                                                            | µg/g |                                                                                                                                                                                                                                                                                                                                 | 26   |
| Mg                                                                                                                                                                           | µg/g |                                                                                                                                                                                                                                                                                                                                 | 1.8  |
| Na                                                                                                                                                                           | µg/g |                                                                                                                                                                                                                                                                                                                                 | 6700 |
| Nb                                                                                                                                                                           | µg/g |                                                                                                                                                                                                                                                                                                                                 | 1.3  |
| Ni                                                                                                                                                                           | µg/g |                                                                                                                                                                                                                                                                                                                                 | 1.9  |
| Sn                                                                                                                                                                           | µg/g |                                                                                                                                                                                                                                                                                                                                 | 10   |
| Zn                                                                                                                                                                           | µg/g |                                                                                                                                                                                                                                                                                                                                 | 8.8  |
| <b>Electron microscopy</b><br>Method / technical data of microscope:<br>SOP: See KIT (LEM)<br><br>Magnification: 450.000<br><br><br>UNIVLEEDS<br>TEM/ SEM<br><br><br>SEM-EDX |      |  <p>Electron Microscopy by KIT (LEM); Diameter : 10nm or smaller</p>   |      |
| Radical formation potential by DCF-Test:<br>(H <sub>2</sub> O <sub>2</sub> as positive control) (KIT)                                                                        |      |  <p>Result: TiO<sub>2</sub> NP_005 induced a moderate increase of DCFH oxidation in dependence of concentration (3.3 fold of nanoparticle free control at 400 µg/ml).</p>                                                                   |      |
| Comments and other relevant physical-chemical properties and material characterization information                                                                           |      |                                                                                                                                                                                                                                                                                                                                 |      |
| Place, Date Karlsruhe, 29.11.2016                                                                                                                                            |      | Responsible H.-R. Paur, KIT                                                                                                                                                                                                                                                                                                     |      |

|                                                                                                                           |                                      |                                                                                                                                                                                |                                                                                      |
|---------------------------------------------------------------------------------------------------------------------------|--------------------------------------|--------------------------------------------------------------------------------------------------------------------------------------------------------------------------------|--------------------------------------------------------------------------------------|
| <b>REPRESENTATIVE TEST PARTICLES</b><br>Nanomaterial Identification<br>according to OECD<br>ENV/JM/MONO(2009)20/REV pp29. |                                      |                                                                                              |                                                                                      |
| Nanomaterial name $\text{TiO}_2\text{-NP}$<br>Particle Code $\text{TiO}_2\text{NP\_006}$                                  |                                      | <b>Manufacturer /Institute/Date</b><br><b>Jordi Piella Bagaria; provided by ICN; 09/2012</b>                                                                                   |                                                                                      |
| Composition $\text{TiO}_2$<br>Method of production      B2B Sol-Gel synthesis                                             |                                      | <b>Technology Expert:</b> Jordi Piella Bagaria                                                                                                                                 |                                                                                      |
| <b>Kind of suspension:</b>                                                                                                |                                      | <b>Suspension</b> <input checked="" type="checkbox"/> <b>Powder</b> <input type="checkbox"/><br>Suspended in <u>miliQ-water</u><br>pH <u>5</u><br>stabilizer <u>5 mM TMAOH</u> |                                                                                      |
| <b>Property</b>                                                                                                           | <b>unit</b>                          | <b>Method / Institute</b>                                                                                                                                                      | <b>Value</b>                                                                         |
| Agglomeration/aggregation                                                                                                 |                                      | HRTEM (KIT)                                                                                                                                                                    | Agglomerated/ crystalline                                                            |
| Crystalline phase                                                                                                         |                                      | D5000 Diffractometer (UU)<br>PANalytical X'Pert diffractometer (ICN)                                                                                                           |  |
| Crystallite size                                                                                                          |                                      | HRTEM (KIT)                                                                                                                                                                    |                                                                                      |
| Octanol-water partition coefficient                                                                                       |                                      | Extraction/ ICP-MS (ICN)                                                                                                                                                       | $P_{OW}=0$                                                                           |
| Photocatalytic activity                                                                                                   |                                      | Rhodamin-B Bleaching/UV-B-100<br>10mg/ml in Water (ICN)                                                                                                                        | high                                                                                 |
| Porosity                                                                                                                  | -/- or %                             | n.a.                                                                                                                                                                           | n.a.                                                                                 |
| Pour density                                                                                                              | cm <sup>3</sup> /g                   | (BJH) Pore Size Distribution and Volume by ASAP2020 (UU)                                                                                                                       | n.a.                                                                                 |
| Size distribution:<br>(suspension in water)                                                                               | Modal value $X_M$ (PDI)              | nm                                                                                                                                                                             | Zetasizer Nano ZS /UCD<br>217.0 (PDI:0.388)                                          |
|                                                                                                                           | Total concentration                  | mg/ml                                                                                                                                                                          | DCS (UCD) (RWtAv / RNumAv)<br>0.0542/0.0386<br>1mg/ml                                |
| Size distribution:<br>(Aerosol)                                                                                           | Modal value $X_M$ ( $\sigma_{geo}$ ) | nm                                                                                                                                                                             | SMPS TSI, DMA 3071 with CPC<br>3022A / KIT<br>56.5 ( $\sigma_{geo}=1.47$ )           |
|                                                                                                                           | Total concentration                  | mg/cm <sup>3</sup> or #/cm <sup>3</sup>                                                                                                                                        | 1.2x 10 <sup>4</sup> /cm <sup>3</sup>                                                |
| Solubility in _____                                                                                                       | g/l                                  |                                                                                                                                                                                |                                                                                      |
| Solubility in H <sub>2</sub> O after 30 days                                                                              | mg/ml                                | Extraction/ ICP-MS (ICN)                                                                                                                                                       | none                                                                                 |
| Specific surface area                                                                                                     | cm <sup>2</sup> /g                   | BET by ASAP2020 (UU)                                                                                                                                                           | n.a.                                                                                 |
| Surface chemistry                                                                                                         |                                      |                                                                                                                                                                                |                                                                                      |
| Zeta potential (surface charge)                                                                                           | eV                                   | Zetasizer Nano ZS /UU                                                                                                                                                          | -33.6 ± 1.2 mV<br>pH(10.10)                                                          |

|                                                                                                                                                                                                                                      |      |                                                                                                                                                                                                                                                                                                                                 |     |
|--------------------------------------------------------------------------------------------------------------------------------------------------------------------------------------------------------------------------------------|------|---------------------------------------------------------------------------------------------------------------------------------------------------------------------------------------------------------------------------------------------------------------------------------------------------------------------------------|-----|
| Summary of trace analyses                                                                                                                                                                                                            |      | ICP-MS / KIT                                                                                                                                                                                                                                                                                                                    |     |
| Ba                                                                                                                                                                                                                                   | µg/g |                                                                                                                                                                                                                                                                                                                                 | 21  |
| Ca                                                                                                                                                                                                                                   | µg/g |                                                                                                                                                                                                                                                                                                                                 | 80  |
| Fe                                                                                                                                                                                                                                   | µg/g |                                                                                                                                                                                                                                                                                                                                 | 11  |
| K                                                                                                                                                                                                                                    | µg/g |                                                                                                                                                                                                                                                                                                                                 | 52  |
| Mg                                                                                                                                                                                                                                   | µg/g |                                                                                                                                                                                                                                                                                                                                 | 4   |
| Na                                                                                                                                                                                                                                   | µg/g |                                                                                                                                                                                                                                                                                                                                 | 140 |
| Nb                                                                                                                                                                                                                                   | µg/g |                                                                                                                                                                                                                                                                                                                                 | 1.1 |
| Pb                                                                                                                                                                                                                                   | µg/g |                                                                                                                                                                                                                                                                                                                                 | 1.2 |
| Sn                                                                                                                                                                                                                                   | µg/g |                                                                                                                                                                                                                                                                                                                                 | 11  |
| Zn                                                                                                                                                                                                                                   | µg/g |                                                                                                                                                                                                                                                                                                                                 | 9.6 |
| <b>Electron microscopy</b><br>Method / technical data of microscope:<br>SOP: See KIT (LEM)<br><br>Magnification: 450.000<br><br><br><br><br><br><br><br><br><br>UNIVLEEDS<br>TEM/ SEM<br><br><br><br><br><br><br><br><br><br>SEM-EDX |      |  <p>Electron Microscopy by KIT (LEM); Diameter : 10nm or smaller</p>   |     |
| Radical formation potential by DCF-Test:<br>(H <sub>2</sub> O <sub>2</sub> as positive control) (KIT)                                                                                                                                |      |  <p>Result: TiO<sub>2</sub> NP_006 induced a moderate increase of DCFH oxidation in dependence of concentration (4.8 fold of nanoparticle free control at 400 µg/ml).</p>                                                                   |     |
| Comments and other relevant physical-chemical properties and material characterization information                                                                                                                                   |      |                                                                                                                                                                                                                                                                                                                                 |     |
| Place, Date Karlsruhe, 29.11.2016                                                                                                                                                                                                    |      | Responsible H.-R. Paur, KIT                                                                                                                                                                                                                                                                                                     |     |

| <b>REPRESENTATIVE TEST PARTICLES</b><br>Nanomaterial Identification<br>according to OECD<br>ENV/JM/MONO(2009)20/REV pp29. |                                      |                                                                                                                                                                                |                                                                         |  Research Infrastructure<br><b>QualityNano</b> |  |
|---------------------------------------------------------------------------------------------------------------------------|--------------------------------------|--------------------------------------------------------------------------------------------------------------------------------------------------------------------------------|-------------------------------------------------------------------------|----------------------------------------------------------------------------------------------------------------------------------|--|
| Nanomaterial name $\text{TiO}_2\text{-NP}$<br>Particle Code $\text{TiO}_2\text{NP\_007}$                                  |                                      | <b>Manufacturer /Institute/Date</b><br><b>Jordi Piella Bagaria; provided by ICN; 09/2012</b>                                                                                   |                                                                         |                                                                                                                                  |  |
| Composition $\text{TiO}_2$<br>Method of production        B2B Sol-Gel synthesis                                           |                                      | <b>Technology Expert:</b> Jordi Piella Bagaria                                                                                                                                 |                                                                         |                                                                                                                                  |  |
| <b>Kind of suspension:</b>                                                                                                |                                      | <b>Suspension</b> <input checked="" type="checkbox"/> <b>Powder</b> <input type="checkbox"/><br>Suspended in <u>miliQ-water</u><br>pH <u>5</u><br>stabilizer <u>5 mM TMAOH</u> |                                                                         |                                                                                                                                  |  |
| Property                                                                                                                  |                                      | unit                                                                                                                                                                           | Method / Institute                                                      | Value                                                                                                                            |  |
| Agglomeration/aggregation                                                                                                 |                                      |                                                                                                                                                                                | HRTEM (KIT)                                                             | Agglomerated/ crystalline                                                                                                        |  |
| Crystalline phase                                                                                                         |                                      |                                                                                                                                                                                | D5000 Diffractometer (UU)<br>PANalytical X'Pert diffractometer (ICN)    |                                              |  |
| Crystallite size                                                                                                          |                                      |                                                                                                                                                                                | HRTEM (KIT)                                                             |                                                                                                                                  |  |
| Octanol-water partition coefficient                                                                                       |                                      |                                                                                                                                                                                | Extraction/ ICP-MS (ICN)                                                | $P_{OW}=0$                                                                                                                       |  |
| Photocatalytic activity                                                                                                   |                                      |                                                                                                                                                                                | Rhodamin-B Bleaching/UV-B-100<br>10mg/ml in Water (ICN)                 | medium                                                                                                                           |  |
| Porosity                                                                                                                  |                                      | -/- or %                                                                                                                                                                       | n.a.                                                                    | n.a.                                                                                                                             |  |
| Pour density                                                                                                              |                                      | cm <sup>3</sup> /g                                                                                                                                                             | (BJH) Pore Size Distribution and<br>Volume by ASAP2020 (UU)             | n.a.                                                                                                                             |  |
| Size distribution:<br>(suspension in water)                                                                               | Modal value $X_M$ (PDI)              | nm                                                                                                                                                                             | Zetasizer Nano ZS /UCD                                                  | 281.3 (PDI:0.409)                                                                                                                |  |
|                                                                                                                           | Total concentration                  | mg/ml                                                                                                                                                                          | DCS (UCD) (RWtAv / RNumAv)                                              | 0.0700/0.0406                                                                                                                    |  |
| Size distribution:<br>(Aerosol)                                                                                           | Modal value $X_M$ ( $\sigma_{geo}$ ) | nm                                                                                                                                                                             | SMPS TSI, DMA 3071 with CPC<br>3022A / KIT<br>dispersed by electrospray | 59 ( $\sigma_{geo}=1.45$ )                                                                                                       |  |
|                                                                                                                           | Total concentration                  | mg/cm <sup>3</sup> or #/cm <sup>3</sup>                                                                                                                                        |                                                                         | 6.0x 10 <sup>3</sup> /cm <sup>3</sup>                                                                                            |  |
| Solubility in _____                                                                                                       |                                      | g/l                                                                                                                                                                            |                                                                         |                                                                                                                                  |  |
| Solubility in H <sub>2</sub> O after 30 days                                                                              |                                      | mg/ml                                                                                                                                                                          | Extraction/ ICP-MS (ICN)                                                | none                                                                                                                             |  |
| Specific surface area                                                                                                     |                                      | cm <sup>2</sup> /g                                                                                                                                                             | BET by ASAP2020 (UU)                                                    | n.a.                                                                                                                             |  |
| Surface chemistry                                                                                                         |                                      |                                                                                                                                                                                |                                                                         |                                                                                                                                  |  |
| Zeta potential (surface charge)                                                                                           |                                      | eV                                                                                                                                                                             | Zetasizer Nano ZS /UU                                                   | -37.4 ± 1.4 mV<br>pH(9.13)                                                                                                       |  |

|                                                                                                                                                                                      |      |                                                                                                                                                                                                                                       |       |
|--------------------------------------------------------------------------------------------------------------------------------------------------------------------------------------|------|---------------------------------------------------------------------------------------------------------------------------------------------------------------------------------------------------------------------------------------|-------|
| Summary of trace analyses                                                                                                                                                            |      | ICP-MS / KIT                                                                                                                                                                                                                          |       |
| Ba                                                                                                                                                                                   | µg/g |                                                                                                                                                                                                                                       | 50    |
| Ca                                                                                                                                                                                   | µg/g |                                                                                                                                                                                                                                       | 130   |
| Fe                                                                                                                                                                                   | µg/g |                                                                                                                                                                                                                                       | 60    |
| Na                                                                                                                                                                                   | µg/g |                                                                                                                                                                                                                                       | 22000 |
| Sn                                                                                                                                                                                   | µg/g |                                                                                                                                                                                                                                       | 9     |
| <b>Electron microscopy</b><br>Method / technical data of microscope:<br>SOP: See KIT (LEM)<br><br>Magnification: 450.000<br><br><br><br>UNIVLEEDS<br>TEM/ SEM<br><br><br><br>SEM-EDX |      |  <p>Electron Microscopy by KIT (LEM); Diameter : ca. 5 nm</p>  |       |
| Radical formation potential by DCF-Test:<br>(H <sub>2</sub> O <sub>2</sub> as positive control) (KIT)                                                                                |      |  <p>Result: TiO2 NP_007 induced a no increase of DCFH oxidation.</p>                                                                              |       |
| Comments and other relevant physical-chemical properties and material characterization information                                                                                   |      |                                                                                                                                                                                                                                       |       |
| Place, Date Karlsruhe, 29.11.2016                                                                                                                                                    |      | Responsible H.-R. Paur, KIT                                                                                                                                                                                                           |       |

|                                                                                                                           |                                                |                                                                                                                                                                                                                             |                                                                                                       |
|---------------------------------------------------------------------------------------------------------------------------|------------------------------------------------|-----------------------------------------------------------------------------------------------------------------------------------------------------------------------------------------------------------------------------|-------------------------------------------------------------------------------------------------------|
| <b>REPRESENTATIVE TEST PARTICLES</b><br>Nanomaterial Identification<br>according to OECD<br>ENV/JM/MONO(2009)20/REV pp29. |                                                |  Research Infrastructure<br><b>QualityNano</b>                                                                                            |                                                                                                       |
| Nanomaterial name           TiO <sub>2</sub> -NP<br>Particle Code                TiO <sub>2</sub> NP_008                  |                                                | <b>Manufacturer /Institute/Date</b><br><b>Jordi Piella Bagaria; provided by ICN; 09/2012</b><br><br><b>Technology Expert:</b> Jordi Piella Bagaria                                                                          |                                                                                                       |
| Composition                TiO <sub>2</sub><br>Method of production       B2B Sol-Gel synthesis                           |                                                |                                                                                                                                                                                                                             |                                                                                                       |
| <b>Kind of suspension:</b>                                                                                                |                                                | <b>Suspension</b> <input checked="" type="checkbox"/> <b>Powder</b> <input type="checkbox"/><br>Suspended in                miliQ-water<br>pH                               7<br>stabilizer                      5 mM TMAOH |                                                                                                       |
| <b>Property</b>                                                                                                           | <b>unit</b>                                    | <b>Method / Institute</b>                                                                                                                                                                                                   | <b>Value</b>                                                                                          |
| Agglomeration/aggregation                                                                                                 |                                                | HRTEM (KIT)                                                                                                                                                                                                                 | Agglomerated/ crystalline                                                                             |
| Crystalline phase                                                                                                         |                                                | D5000 Diffractometer (UU)<br>PANalytical X'Pert diffractometer (ICN)                                                                                                                                                        |                   |
| Crystallite size                                                                                                          |                                                | HRTEM (KIT)                                                                                                                                                                                                                 |                                                                                                       |
| Octanol-water partition coefficient                                                                                       |                                                | Extraction/ ICP-MS (ICN)                                                                                                                                                                                                    | P <sub>OW</sub> =0                                                                                    |
| Photocatalytic activity                                                                                                   |                                                | Rhodamin-B Bleaching/UV-B-100<br>10mg/ml in Water (ICN)                                                                                                                                                                     | None-medium                                                                                           |
| Porosity                                                                                                                  | -/- or %                                       | n.a.                                                                                                                                                                                                                        | n.a.                                                                                                  |
| Pour density                                                                                                              | cm <sup>3</sup> /g                             | (BJH) Pore Size Distribution and<br>Volume by ASAP2020 (UU)                                                                                                                                                                 | n.a.                                                                                                  |
| Size distribution:<br>(suspension in water)                                                                               | Modal value X <sub>M</sub> (PDI)               | nm                                                                                                                                                                                                                          | Zetasizer Nano ZS /UCD<br>DCS (UCD) (RWtAv / RNumAv)<br>265.3 (PDI:0.287)<br>0.0618/0.0407            |
|                                                                                                                           | Total concentration                            | mg/ml                                                                                                                                                                                                                       | 1mg/ml                                                                                                |
| Size distribution:<br>(Aerosol)                                                                                           | Modal value X <sub>M</sub> (σ <sub>geo</sub> ) | nm                                                                                                                                                                                                                          | SMPS TSI, DMA 3071 with CPC<br>3022A / KIT<br>dispersed by electrospray<br>70 (σ <sub>geo</sub> =1.5) |
|                                                                                                                           | Total concentration                            | mg/cm <sup>3</sup> or #/cm <sup>3</sup>                                                                                                                                                                                     | 3.7x 10 <sup>3</sup> /cm <sup>3</sup>                                                                 |
| Solubility in _____                                                                                                       | g/l                                            |                                                                                                                                                                                                                             |                                                                                                       |
| Solubility in H <sub>2</sub> O after 30 days                                                                              | mg/ml                                          | Extraction/ ICP-MS (ICN)                                                                                                                                                                                                    | none                                                                                                  |
| Specific surface area                                                                                                     | cm <sup>2</sup> /g                             | BET by ASAP2020 (UU)                                                                                                                                                                                                        | n.a.                                                                                                  |
| Surface chemistry                                                                                                         |                                                |                                                                                                                                                                                                                             |                                                                                                       |
| Zeta potential (surface charge)                                                                                           | eV                                             | Zetasizer Nano ZS /UU                                                                                                                                                                                                       | -36.9 ± 0.3 mV<br>pH 10.23                                                                            |

|                                                                                                                                                                              |      |                                                                                                                                                                                                                                                                  |       |
|------------------------------------------------------------------------------------------------------------------------------------------------------------------------------|------|------------------------------------------------------------------------------------------------------------------------------------------------------------------------------------------------------------------------------------------------------------------|-------|
| Summary of trace analyses                                                                                                                                                    |      | ICP-MS / KIT                                                                                                                                                                                                                                                     |       |
| Ba                                                                                                                                                                           | µg/g |                                                                                                                                                                                                                                                                  | 28    |
| Ca                                                                                                                                                                           | µg/g |                                                                                                                                                                                                                                                                  | 128   |
| Fe                                                                                                                                                                           | µg/g |                                                                                                                                                                                                                                                                  | 25    |
| K                                                                                                                                                                            | µg/g |                                                                                                                                                                                                                                                                  | 129   |
| Na                                                                                                                                                                           | µg/g |                                                                                                                                                                                                                                                                  | 96000 |
| Nb                                                                                                                                                                           | µg/g |                                                                                                                                                                                                                                                                  | 1.3   |
| Ni                                                                                                                                                                           | µg/g |                                                                                                                                                                                                                                                                  | 2.2   |
| Pb                                                                                                                                                                           | µg/g |                                                                                                                                                                                                                                                                  | 0.2   |
| Sn                                                                                                                                                                           | µg/g |                                                                                                                                                                                                                                                                  | 8     |
| <b>Electron microscopy</b><br>Method / technical data of microscope:<br>SOP: See KIT (LEM)<br><br>Magnification: 450.000<br><br><br>UNIVLEEDS<br>TEM/ SEM<br><br><br>SEM-EDX |      | <div></div> <p>Electron Microscopy by KIT (LEM); Diameter : 5nm and smaller</p> <div></div> |       |
| Radical formation potential by DCF-Test:<br>(H <sub>2</sub> O <sub>2</sub> as positive control) (KIT)                                                                        |      | <div></div> <p>Result: TiO<sub>2</sub> NP_008 induced a low increase of DCFH oxidation at high concentration of 400 µg/ml (1.5 fold of nanoparticle free control).</p>       |       |
| Comments and other relevant physical-chemical properties and material characterization information                                                                           |      |                                                                                                                                                                                                                                                                  |       |
| Place, Date Karlsruhe, 29.11.2016                                                                                                                                            |      | Responsible H.-R. Paur, KIT                                                                                                                                                                                                                                      |       |

Supplemental S6: Physicochemical characterization data sheets of PS-NH<sub>2</sub> NMs

| <b>REPRESENTATIVE TEST PARTICLES</b><br>Nanomaterial Identification<br>according to OECD<br>ENV/JM/MONO(2009)20/REV pp29. |                                                |  Research Infrastructure<br><b>QualityNano</b> |                                            |
|---------------------------------------------------------------------------------------------------------------------------|------------------------------------------------|----------------------------------------------------------------------------------------------------------------------------------|--------------------------------------------|
| Nanomaterial name                      Latex<br>Particle Code                              PSNP_001                       |                                                | <b>Manufacturer /Institute/Date</b><br><b>Eugene Mahon ; provided by UCD; 10/2012</b><br><b>Technology Expert:</b> Eugene Mahon  |                                            |
| Composition                              PS<br>Method of production                      Sol-Gel synthesis                |                                                |                                                                                                                                  |                                            |
| <b>Kind of suspension:</b>                                                                                                |                                                | <b>Suspension</b><br>Suspended in<br>pH<br>stabilizer                                                                            | <b>Powder</b><br><u>Pure water</u><br>none |
| Property                                                                                                                  | unit                                           | Method / Institute                                                                                                               | Value                                      |
| Agglomeration/aggregation                                                                                                 |                                                | HRTEM (KIT)                                                                                                                      | Agglomerated                               |
| Crystalline phase                                                                                                         |                                                | D5000 Diffractometer (UU)<br>PANalytical X'Pert diffractometer (ICN)                                                             | Amorphous                                  |
| Crystallite size                                                                                                          |                                                | HRTEM (KIT)                                                                                                                      | n.a.                                       |
| Octanol-water partition coefficient                                                                                       |                                                | Determination of absorbance (ICN)                                                                                                | P <sub>ow</sub> =0                         |
| Photocatalytic activity                                                                                                   |                                                | Rhodamin-B Bleaching/UV-B-100<br>0.05mg/ml in Water (ICN)                                                                        | none                                       |
| Porosity                                                                                                                  | -/- or %                                       | n.a.                                                                                                                             | none                                       |
| Pour density                                                                                                              | cm <sup>3</sup> /g                             | (BJH) Pore Size Distribution and<br>Volume by ASAP2020 (UU)                                                                      | none                                       |
| Size distribution:<br>(suspension in<br>water)                                                                            | Modal value X <sub>M</sub> (PDI)               | nm<br>Zetasizer Nano ZS /UCD<br>DCS (UCD) (RWtAv / RNumAv)                                                                       | 115.9 (PDI:0.029)<br>NM: 94.29<br>n.a.     |
|                                                                                                                           | Total concentration                            | mg/ml                                                                                                                            | 10                                         |
| Size distribution:<br>(Aerosol)                                                                                           | Modal value X <sub>M</sub> (σ <sub>geo</sub> ) | nm<br>SMPS TSI, DMA 3071 with CPC<br>3022A / KIT<br>dispersed by electrospray                                                    | 120 (σ <sub>geo</sub> =1.15)               |
|                                                                                                                           | Total concentration                            | mg/cm <sup>3</sup> or #/cm <sup>3</sup>                                                                                          | 3.4x 10 <sup>3</sup> /cm <sup>3</sup>      |
| Solubility in _____                                                                                                       | g/l                                            |                                                                                                                                  |                                            |
| Solubility in H <sub>2</sub> O                                                                                            | g/l                                            | Extraction/ ICP-MS (ICN)                                                                                                         | n.a.                                       |
| Specific surface area                                                                                                     | m <sup>2</sup> /g                              | BET by ASAP2020 (UU)                                                                                                             | none                                       |
| Surface chemistry                                                                                                         |                                                |                                                                                                                                  |                                            |
| Zeta potential (surface charge)                                                                                           | mV                                             | Zetasizer Nano ZS /UU                                                                                                            | +48.7 ± 0.5<br>pH: 6.1                     |

|                                                                                                                                                                                                                                 |      |                                                                                                                                                                                                                                                                                                                                                     |      |
|---------------------------------------------------------------------------------------------------------------------------------------------------------------------------------------------------------------------------------|------|-----------------------------------------------------------------------------------------------------------------------------------------------------------------------------------------------------------------------------------------------------------------------------------------------------------------------------------------------------|------|
| Summary of trace analyses                                                                                                                                                                                                       |      | ICP-MS / KIT                                                                                                                                                                                                                                                                                                                                        |      |
| Na                                                                                                                                                                                                                              | µg/g |                                                                                                                                                                                                                                                                                                                                                     | 42   |
| Ba                                                                                                                                                                                                                              | µg/g |                                                                                                                                                                                                                                                                                                                                                     | 2.1  |
| Yb                                                                                                                                                                                                                              | µg/g |                                                                                                                                                                                                                                                                                                                                                     | 0.01 |
| Ta                                                                                                                                                                                                                              | µg/g |                                                                                                                                                                                                                                                                                                                                                     | 0.05 |
| W                                                                                                                                                                                                                               | µg/g |                                                                                                                                                                                                                                                                                                                                                     | 0.05 |
| <b>Electron microscopy</b><br>Method / technical data of microscope:<br>SOP: See KIT (LEM)<br><br>Magnification: 450.000<br><br><br><br><br><br><br><br><br><br>UNIVLEEDS<br>SEM<br><br><br><br><br><br><br><br><br><br>SEM-EDX |      | <div></div> <p>Electron Microscopy by KIT (LEM); Diameter : 10-100 nm</p>                                                                                                                                                                                        |      |
| Radical formation potential by DCF-Test:<br>(H <sub>2</sub> O <sub>2</sub> as positive control) (KIT)                                                                                                                           |      | <div></div> <p>Result: PSNP_001 induced a moderate increase of DCFH oxidation (4.0 fold of nanoparticle free control at 200 µg/ml). At higher concentrations, the DCF fluorescence decreased probably due to adsorption of the dye on the particle surface.</p> |      |
| Comments and other relevant physical-chemical properties and material characterization information                                                                                                                              |      |                                                                                                                                                                                                                                                                                                                                                     |      |
| Place, Date Karlsruhe, 29.11.2016                                                                                                                                                                                               |      | Responsible H.-R. Paur, KIT                                                                                                                                                                                                                                                                                                                         |      |

# REPRESENTATIVE TEST PARTICLES

Nanomaterial Identification  
according to OECD

ENV/JM/MONO(2009)20/REV pp29.



Research Infrastructure

QualityNano

| Nanomaterial name                      Latex<br>Particle Code                              PSNP_002        |                                                | <b>Manufacturer /Institute/Date</b><br><b>Eugene Mahon ; provided by UCD; 10/2012</b><br><b>Technology Expert:</b> Eugene Mahon |                                                                           |
|------------------------------------------------------------------------------------------------------------|------------------------------------------------|---------------------------------------------------------------------------------------------------------------------------------|---------------------------------------------------------------------------|
| Composition                              PS<br>Method of production                      Sol-Gel synthesis |                                                |                                                                                                                                 |                                                                           |
| <b>Kind of suspension:</b>                                                                                 |                                                | <b>Suspension</b><br>Suspended in<br>pH<br>stabilizer                                                                           | <b>Powder</b><br><u>Pure water</u><br>none                                |
| Property                                                                                                   | unit                                           | Method / Institute                                                                                                              | Value                                                                     |
| Agglomeration/aggregation                                                                                  |                                                | HRTEM (KIT)                                                                                                                     | Agglomerated                                                              |
| Crystalline phase                                                                                          |                                                | D5000 Diffractometer (UU)<br>PANalytical X'Pert diffractometer (ICN)                                                            | Amorphous                                                                 |
| Crystallite size                                                                                           |                                                | HRTEM (KIT)                                                                                                                     | n.a.                                                                      |
| Octanol-water partition coefficient                                                                        |                                                | Determination of absorbance (ICN)                                                                                               | P <sub>OW</sub> =0                                                        |
| Photocatalytic activity                                                                                    |                                                | Rhodamin-B Bleaching/UV-B-100<br>0.05mg/ml in Water (ICN)                                                                       | none                                                                      |
| Porosity                                                                                                   | -/- or %                                       | n.a.                                                                                                                            | none                                                                      |
| Pour density                                                                                               | cm <sup>3</sup> /g                             | (BJH) Pore Size Distribution and<br>Volume by ASAP2020 (UU)                                                                     | none                                                                      |
| Size distribution:<br>(suspension in<br>water)                                                             | Modal value X <sub>M</sub> (PDI)               | nm                                                                                                                              | Zetasizer Nano ZS /UCD<br><br>UNIVLEEDS<br><br>DCS (UCD) (RWtAv / RNumAv) |
|                                                                                                            | Total concentration                            | mg/ml                                                                                                                           | 119.1 (PDI:0.80)<br>NM: 91.2<br><br>120.5 (PDI: 0.113)                    |
| Size distribution:<br>(Aerosol)                                                                            | Modal value X <sub>M</sub> (σ <sub>geo</sub> ) | nm                                                                                                                              |                                                                           |
|                                                                                                            | Total concentration                            | mg/cm <sup>3</sup> or #/cm <sup>3</sup>                                                                                         | 106 (σ <sub>geo</sub> =1.12)<br><br>4.4x 10 <sup>3</sup> /cm <sup>3</sup> |
| Solubility in _____                                                                                        | g/l                                            |                                                                                                                                 |                                                                           |
| Solubility in H <sub>2</sub> O                                                                             | g/l                                            | Extraction/ ICP-MS (ICN)                                                                                                        |                                                                           |
| Specific surface area                                                                                      | m <sup>2</sup> /g                              | BET by ASAP2020 (UU)                                                                                                            | none                                                                      |
| Surface chemistry                                                                                          |                                                |                                                                                                                                 |                                                                           |
| Zeta potential (surface charge)                                                                            | mV                                             | Zetasizer Nano ZS /UU                                                                                                           | +44.4 ± 0.3<br>pH: 6.0                                                    |

|                                                                                                                                                                                                    |                                                                                                                                                                                                                                                                                                                                                                                                                                                                                                                                                                                                               |                             |      |
|----------------------------------------------------------------------------------------------------------------------------------------------------------------------------------------------------|---------------------------------------------------------------------------------------------------------------------------------------------------------------------------------------------------------------------------------------------------------------------------------------------------------------------------------------------------------------------------------------------------------------------------------------------------------------------------------------------------------------------------------------------------------------------------------------------------------------|-----------------------------|------|
| Summary of trace analyses                                                                                                                                                                          |                                                                                                                                                                                                                                                                                                                                                                                                                                                                                                                                                                                                               | ICP-MS / KIT                |      |
| Na                                                                                                                                                                                                 | µg/g                                                                                                                                                                                                                                                                                                                                                                                                                                                                                                                                                                                                          |                             | 103  |
| Mg                                                                                                                                                                                                 | µg/g                                                                                                                                                                                                                                                                                                                                                                                                                                                                                                                                                                                                          |                             | 23   |
| Fe                                                                                                                                                                                                 | µg/g                                                                                                                                                                                                                                                                                                                                                                                                                                                                                                                                                                                                          |                             | 11   |
| W                                                                                                                                                                                                  | µg/g                                                                                                                                                                                                                                                                                                                                                                                                                                                                                                                                                                                                          |                             | 0.07 |
| <b>Electron microscopy</b><br>Method / technical data of microscope:<br>SOP: See KIT (LEM)<br><br>Magnification: 450.000<br><br><br>UNIVLEEDS<br>SEM-scale bar/ SEM<br><br><br><br><br><br>SEM-EDX | <div></div> <p>Electron Microscopy by KIT (LEM); Diameter: 40-90 nm</p> <div></div> <div></div> |                             |      |
| Radical formation potential by DCF-Test:<br>(H <sub>2</sub> O <sub>2</sub> as positive control) (KIT)                                                                                              | <div></div> <p>Result: PSNP_002 induced a moderate increase of DCFH oxidation (4.1 fold of nanoparticle free control at 200 µg/ml). At higher concentrations, the DCF fluorescence decreased probably due to adsorption of the dye on the particle surface.</p>                                                                                                                                                                                                                                                           |                             |      |
| Comments and other relevant physical-chemical properties and material characterization information                                                                                                 |                                                                                                                                                                                                                                                                                                                                                                                                                                                                                                                                                                                                               |                             |      |
| Place, Date Karlsruhe, 09.04.2013                                                                                                                                                                  |                                                                                                                                                                                                                                                                                                                                                                                                                                                                                                                                                                                                               | Responsible H.-R. Paur, KIT |      |

## REPRESENTATIVE TEST PARTICLES

Nanomaterial Identification  
according to OECD  
ENV/JM/MONO(2009)20/REV pp29.



| Nanomaterial name                      Latex<br>Particle Code                              PSNP_003        |                                                | <b>Manufacturer /Institute/Date</b><br><b>Eugene Mahon ; provided by UCD; 10/2012</b><br><b>Technology Expert:</b> Eugene Mahon |                                                          |
|------------------------------------------------------------------------------------------------------------|------------------------------------------------|---------------------------------------------------------------------------------------------------------------------------------|----------------------------------------------------------|
| Composition                              PS<br>Method of production                      Sol-Gel synthesis |                                                |                                                                                                                                 |                                                          |
| <b>Kind of suspension:</b>                                                                                 |                                                | <b>Suspension</b><br>Suspended in<br>pH<br>stabilizer                                                                           | <b>Powder</b><br><u>Pure water</u><br>none               |
| Property                                                                                                   | unit                                           | Method / Institute                                                                                                              | Value                                                    |
| Agglomeration/aggregation                                                                                  |                                                | HRTEM (KIT)                                                                                                                     | Agglomerated                                             |
| Crystalline phase                                                                                          |                                                | D5000 Diffractometer (UU)<br>PANalytical X'Pert diffractometer (ICN)                                                            | Amorphous                                                |
| Crystallite size                                                                                           |                                                | HRTEM (KIT)                                                                                                                     | n.a.                                                     |
| Octanol-water partition coefficient                                                                        |                                                | Determination of absorbance (ICN)                                                                                               | P <sub>OW</sub> =0                                       |
| Photocatalytic activity                                                                                    |                                                | Rhodamin-B Bleaching/UV-B-100<br>0.05mg/ml in Water (ICN)                                                                       | none                                                     |
| Porosity                                                                                                   | -/- or %                                       | n.a.                                                                                                                            | none                                                     |
| Pour density                                                                                               | cm <sup>3</sup> /g                             | (BJH) Pore Size Distribution and<br>Volume by ASAP2020 (UU)                                                                     | none                                                     |
| Size distribution:<br>(suspension in<br>water)                                                             | Modal value X <sub>M</sub> (PDI)               | nm<br><br>Zetasizer Nano ZS /UCD<br><br>UNIVLEEDS<br><br>DCS (UCD) (RWtAv / RNumAv)                                             | 140.8 (PDI:0.011)<br>NM: 121.0<br><br>123.4 (PDI: 0.101) |
|                                                                                                            | Total concentration                            | mg/ml                                                                                                                           | 10                                                       |
| Size distribution:<br>(Aerosol)                                                                            | Modal value X <sub>M</sub> (σ <sub>geo</sub> ) | nm<br><br>SMPS TSI. DMA 3071 with CPC<br>3022A / KIT<br>dispersed by electrospray                                               | 88.2 (σ <sub>geo</sub> =1.18)                            |
|                                                                                                            | Total concentration                            | mg/cm <sup>3</sup> or #/cm <sup>3</sup>                                                                                         | 3.1x 10 <sup>4</sup> /cm <sup>3</sup>                    |
| Solubility in _____                                                                                        | g/l                                            |                                                                                                                                 |                                                          |
| Solubility in H <sub>2</sub> O                                                                             | g/l                                            | Extraction/ ICP-MS (ICN)                                                                                                        |                                                          |
| Specific surface area                                                                                      | m <sup>2</sup> /g                              | BET by ASAP2020 (UU)                                                                                                            | none                                                     |
| Surface chemistry                                                                                          |                                                |                                                                                                                                 |                                                          |
| Zeta potential (surface charge)                                                                            | mV                                             | Zetasizer Nano ZS /UU                                                                                                           | +50.9 ± 1.9<br>pH:6.1                                    |

|                                                                                                                                                                                                                                                |      |                                                                                                                                                                                                                                                                                                                                                     |      |
|------------------------------------------------------------------------------------------------------------------------------------------------------------------------------------------------------------------------------------------------|------|-----------------------------------------------------------------------------------------------------------------------------------------------------------------------------------------------------------------------------------------------------------------------------------------------------------------------------------------------------|------|
| Summary of trace analyses                                                                                                                                                                                                                      |      | ICP-MS / KIT                                                                                                                                                                                                                                                                                                                                        |      |
| Na                                                                                                                                                                                                                                             | µg/g |                                                                                                                                                                                                                                                                                                                                                     | 113  |
| Cr                                                                                                                                                                                                                                             | µg/g |                                                                                                                                                                                                                                                                                                                                                     | 1.1  |
| Fe                                                                                                                                                                                                                                             | µg/g |                                                                                                                                                                                                                                                                                                                                                     | 17   |
| Ta                                                                                                                                                                                                                                             | µg/g |                                                                                                                                                                                                                                                                                                                                                     | 0.01 |
| W                                                                                                                                                                                                                                              | µg/g |                                                                                                                                                                                                                                                                                                                                                     | 0.08 |
| <b>Electron microscopy</b><br>Method / technical data of microscope:<br>SOP: See KIT (LEM)<br><br>Magnification: 450.000<br><br><br><br><br><br><br><br><br><br>UNIVLEEDS<br>SEM-scale bar/ SEM<br><br><br><br><br><br><br><br><br><br>SEM-EDX |      | <div></div> <p>Electron Microscopy by KIT (LEM); Diameter : 25-120 nm</p>                                                                                                                                                                                        |      |
| Radical formation potential by DCF-Test:<br>(H <sub>2</sub> O <sub>2</sub> as positive control) (KIT)                                                                                                                                          |      | <div></div> <p>Result: PSNP_003 induced a moderate increase of DCFH oxidation (3.8 fold of nanoparticle free control at 200 µg/ml). At higher concentrations, the DCF fluorescence decreased probably due to adsorption of the dye on the particle surface.</p> |      |
| Comments and other relevant physical-chemical properties and material characterization information                                                                                                                                             |      |                                                                                                                                                                                                                                                                                                                                                     |      |
| Place. Date Karlsruhe. 09.04.2013                                                                                                                                                                                                              |      | Responsible H.-R. Paur. KIT                                                                                                                                                                                                                                                                                                                         |      |

## REPRESENTATIVE TEST PARTICLES

Nanomaterial Identification  
according to OECD  
ENV/JM/MONO(2009)20/REV pp29.



| Nanomaterial name                      Latex<br>Particle Code                              PSNP_004        |                                                | <b>Manufacturer /Institute/Date</b><br><b>Eugene Mahon ; provided by UCD; 10/2012</b><br><b>Technology Expert:</b> Eugene Mahon |                                                                           |
|------------------------------------------------------------------------------------------------------------|------------------------------------------------|---------------------------------------------------------------------------------------------------------------------------------|---------------------------------------------------------------------------|
| Composition                              PS<br>Method of production                      Sol-Gel synthesis |                                                |                                                                                                                                 |                                                                           |
| <b>Kind of suspension:</b>                                                                                 |                                                | <b>Suspension</b><br>Suspended in<br>pH<br>stabilizer                                                                           | <b>Powder</b><br><u>Pure water</u><br>none                                |
| Property                                                                                                   | unit                                           | Method / Institute                                                                                                              | Value                                                                     |
| Agglomeration/aggregation                                                                                  |                                                | HRTEM (KIT)                                                                                                                     | Agglomerated                                                              |
| Crystalline phase                                                                                          |                                                | D5000 Diffractometer (UU)<br>PANalytical X'Pert diffractometer (ICN)                                                            | Amorphous                                                                 |
| Crystallite size                                                                                           |                                                | HRTEM (KIT)                                                                                                                     | n.a.                                                                      |
| Octanol-water partition coefficient                                                                        |                                                | Determination of absorbance (ICN)                                                                                               | P <sub>OW</sub> =0                                                        |
| Photocatalytic activity                                                                                    |                                                | Rhodamin-B Bleaching/UV-B-100<br>0.05mg/ml in Water (ICN)                                                                       | none                                                                      |
| Porosity                                                                                                   | -/- or %                                       | n.a.                                                                                                                            | none                                                                      |
| Pour density                                                                                               | cm <sup>3</sup> /g                             | (BJH) Pore Size Distribution and<br>Volume by ASAP2020 (UU)                                                                     | none                                                                      |
| Size distribution:<br>(suspension in<br>water)                                                             | Modal value X <sub>M</sub> (PDI)               | nm                                                                                                                              | Zetasizer Nano ZS /UCD<br><br>UNIVLEEDS<br><br>DCS (UCD) (RWtAv / RNumAv) |
|                                                                                                            |                                                |                                                                                                                                 | 130.9 (PDI:0.033)<br>NM: 108.4<br><br>123.8 (PDI:0.049)                   |
|                                                                                                            | Total concentration                            | mg/ml                                                                                                                           | 10                                                                        |
| Size distribution:<br>(Aerosol)                                                                            | Modal value X <sub>M</sub> (σ <sub>geo</sub> ) | nm                                                                                                                              | SMPS TSI. DMA 3071 with CPC<br>3022A / KIT<br>dispersed by electrospray   |
|                                                                                                            | Total concentration                            | mg/cm <sup>3</sup> or #/cm <sup>3</sup>                                                                                         | 135 (σ <sub>geo</sub> =1.18)<br><br>1.5x 10 <sup>4</sup> /cm <sup>3</sup> |
| Solubility in _____                                                                                        | g/l                                            |                                                                                                                                 |                                                                           |
| Solubility in H <sub>2</sub> O                                                                             | g/l                                            | Extraction/ ICP-MS (ICN)                                                                                                        |                                                                           |
| Specific surface area                                                                                      | m <sup>2</sup> /g                              | BET by ASAP2020 (UU)                                                                                                            | none                                                                      |
| Surface chemistry                                                                                          |                                                |                                                                                                                                 |                                                                           |
| Zeta potential (surface charge)                                                                            | mV                                             | Zetasizer Nano ZS /UU                                                                                                           | +49.7 ± 0.6<br>pH:6.1                                                     |

|                                                                                                                                                                                                                                                |                                                                                                                                                                                                                                                                                                                                                                                                                                                                                                                                                                                                                 |                             |    |
|------------------------------------------------------------------------------------------------------------------------------------------------------------------------------------------------------------------------------------------------|-----------------------------------------------------------------------------------------------------------------------------------------------------------------------------------------------------------------------------------------------------------------------------------------------------------------------------------------------------------------------------------------------------------------------------------------------------------------------------------------------------------------------------------------------------------------------------------------------------------------|-----------------------------|----|
| Summary of trace analyses                                                                                                                                                                                                                      |                                                                                                                                                                                                                                                                                                                                                                                                                                                                                                                                                                                                                 | ICP-MS / KIT                |    |
| Na                                                                                                                                                                                                                                             | µg/g                                                                                                                                                                                                                                                                                                                                                                                                                                                                                                                                                                                                            |                             | 93 |
| <b>Electron microscopy</b><br>Method / technical data of microscope:<br>SOP: See KIT (LEM)<br><br>Magnification: 450.000<br><br><br><br><br><br><br><br><br><br>UNIVLEEDS<br>SEM-scale bar/ SEM<br><br><br><br><br><br><br><br><br><br>SEM-EDX | <div></div> <p>Electron Microscopy by KIT (LEM); Diameter : 15-100 nm</p> <div></div> <div></div> |                             |    |
| Radical formation potential by DCF-Test:<br>(H <sub>2</sub> O <sub>2</sub> as positive control) (KIT)                                                                                                                                          | <div></div> <p>Result: PSNP_004 induced a moderate increase of DCFH oxidation (3.2 fold of nanoparticle free control at 200 µg/ml). At high concentrations, the DCF fluorescence decreased probably due to adsorption of the dye on the particle surface.</p>                                                                                                                                                                                                                                                               |                             |    |
| Comments and other relevant physical-chemical properties and material characterization information                                                                                                                                             |                                                                                                                                                                                                                                                                                                                                                                                                                                                                                                                                                                                                                 |                             |    |
| Place, Date Karlsruhe, 09.04.2013                                                                                                                                                                                                              |                                                                                                                                                                                                                                                                                                                                                                                                                                                                                                                                                                                                                 | Responsible H.-R. Paur. KIT |    |

## REPRESENTATIVE TEST PARTICLES

Nanomaterial Identification  
according to OECD  
ENV/JM/MONO(2009)20/REV pp29.



| Nanomaterial name                      Latex<br>Particle Code                              PSNP_005        |                                                | <b>Manufacturer /Institute/Date</b><br><b>Eugene Mahon ; provided by UCD; 10/2012</b><br><b>Technology Expert:</b> Eugene Mahon |                                                                                                                         |
|------------------------------------------------------------------------------------------------------------|------------------------------------------------|---------------------------------------------------------------------------------------------------------------------------------|-------------------------------------------------------------------------------------------------------------------------|
| Composition                              PS<br>Method of production                      Sol-Gel synthesis |                                                |                                                                                                                                 |                                                                                                                         |
| <b>Kind of suspension:</b>                                                                                 |                                                | <b>Suspension</b><br>Suspended in<br>pH<br>stabilizer                                                                           | <b>Powder</b><br><u>Pure water</u><br>none                                                                              |
| Property                                                                                                   | unit                                           | Method / Institute                                                                                                              | Value                                                                                                                   |
| Agglomeration/aggregation                                                                                  |                                                | HRTEM (KIT)                                                                                                                     | Agglomerated                                                                                                            |
| Crystalline phase                                                                                          |                                                | D5000 Diffractometer (UU)<br>PANalytical X'Pert diffractometer (ICN)                                                            | Amorphous                                                                                                               |
| Crystallite size                                                                                           |                                                | HRTEM (KIT)                                                                                                                     | n.a.                                                                                                                    |
| Octanol-water partition coefficient                                                                        |                                                | Determination of absorbance (ICN)                                                                                               | P <sub>OW</sub> =0                                                                                                      |
| Photocatalytic activity                                                                                    |                                                | Rhodamin-B Bleaching/UV-B-100<br>0.05mg/ml in Water (ICN)                                                                       | none                                                                                                                    |
| Porosity                                                                                                   | -/- or %                                       | n.a.                                                                                                                            | none                                                                                                                    |
| Pour density                                                                                               | cm <sup>3</sup> /g                             | (BJH) Pore Size Distribution and<br>Volume by ASAP2020 (UU)                                                                     | none                                                                                                                    |
| Size distribution:<br>(suspension in<br>water)                                                             | Modal value X <sub>M</sub> (PDI)               | nm                                                                                                                              | Zetasizer Nano ZS /UCD<br>105.7 (PDI:0.015)<br>NM: 86.9<br>UNIVLEEDS<br>103.3 (PDI:0.068)<br>DCS (UCD) (RWtAv / RNumAv) |
|                                                                                                            | Total concentration                            | mg/ml                                                                                                                           | 10                                                                                                                      |
| Size distribution:<br>(Aerosol)                                                                            | Modal value X <sub>M</sub> (σ <sub>geo</sub> ) | nm                                                                                                                              | SMPS TSI. DMA 3071 with CPC<br>3022A / KIT<br>dispersed by electrospray<br>94 (σ <sub>geo</sub> =1.15)                  |
|                                                                                                            | Total concentration                            | mg/cm <sup>3</sup> or #/cm <sup>3</sup>                                                                                         | 2.3x 10 <sup>4</sup> /cm <sup>3</sup>                                                                                   |
| Solubility in _____                                                                                        | g/l                                            |                                                                                                                                 |                                                                                                                         |
| Solubility in H <sub>2</sub> O                                                                             | g/l                                            | Extraction/ ICP-MS (ICN)                                                                                                        |                                                                                                                         |
| Specific surface area                                                                                      | m <sup>2</sup> /g                              | BET by ASAP2020 (UU)                                                                                                            | none                                                                                                                    |
| Surface chemistry                                                                                          |                                                |                                                                                                                                 |                                                                                                                         |
| Zeta potential (surface charge)                                                                            | mV                                             | Zetasizer Nano ZS /UU                                                                                                           | +52.1 ± 0.2<br>pH:6.1                                                                                                   |

|                                                                                                                                                                                                                                                |                                                                                                                                                                                                                             |                             |      |
|------------------------------------------------------------------------------------------------------------------------------------------------------------------------------------------------------------------------------------------------|-----------------------------------------------------------------------------------------------------------------------------------------------------------------------------------------------------------------------------|-----------------------------|------|
| Summary of trace analyses                                                                                                                                                                                                                      |                                                                                                                                                                                                                             | ICP-MS / KIT                |      |
| Na                                                                                                                                                                                                                                             | µg/g                                                                                                                                                                                                                        |                             | 91   |
| Ir                                                                                                                                                                                                                                             | µg/g                                                                                                                                                                                                                        |                             | 0.13 |
| <b>Electron microscopy</b><br>Method / technical data of microscope:<br>SOP: See KIT (LEM)<br><br>magnification: 450.000<br><br><br><br><br><br><br><br><br><br>UNIVLEEDS<br>SEM-scale bar/ SEM<br><br><br><br><br><br><br><br><br><br>SEM-EDX | <div></div> <p>Electron Microscopy by KIT (LEM); Diameter : 10-90 nm</p>                                                                 |                             |      |
| Radical formation potential by DCF-Test:<br>(H <sub>2</sub> O <sub>2</sub> as positive control) (KIT)                                                                                                                                          | <div></div> <p>Result: PSNP_005 induced a moderate increase of DCFH oxidation (4.2 fold of nanoparticle free control at 200 µg/ml).</p> |                             |      |
| Comments and other relevant physical-chemical properties and material characterization information                                                                                                                                             |                                                                                                                                                                                                                             |                             |      |
| Place, Date Karlsruhe, 09.04.2013                                                                                                                                                                                                              |                                                                                                                                                                                                                             | Responsible H.-R. Paur, KIT |      |

|                                                                                                                           |                                                |                                         |                                                                                                                                  |                                                         |
|---------------------------------------------------------------------------------------------------------------------------|------------------------------------------------|-----------------------------------------|----------------------------------------------------------------------------------------------------------------------------------|---------------------------------------------------------|
| <b>REPRESENTATIVE TEST PARTICLES</b><br>Nanomaterial Identification<br>according to OECD<br>ENV/JM/MONO(2009)20/REV pp29. |                                                |                                         |  Research Infrastructure<br><b>QualityNano</b> |                                                         |
| Nanomaterial name                      Latex<br>Particle Code                              PSNP_006                       |                                                |                                         | <b>Manufacturer /Institute/Date</b><br><b>Eugene Mahon ; provided by UCD; 10/2012</b><br><b>Technology Expert:</b> Eugene Mahon  |                                                         |
| Composition                              PS<br>Method of production                      Sol-Gel synthesis                |                                                |                                         |                                                                                                                                  |                                                         |
| <b>Kind of suspension:</b>                                                                                                |                                                |                                         | <b>Suspension</b><br><br>Suspended in<br>pH<br>stabilizer                                                                        | <b>Powder</b><br><br><u>Pure water</u><br><br>none      |
| <b>Property</b>                                                                                                           |                                                | <b>unit</b>                             | <b>Method / Institute</b>                                                                                                        | <b>Value</b>                                            |
| Agglomeration/aggregation                                                                                                 |                                                |                                         | HRTEM (KIT)                                                                                                                      | Agglomerated                                            |
| Crystalline phase                                                                                                         |                                                |                                         | D5000 Diffractometer (UU)<br>PANalytical X'Pert diffractometer (ICN)                                                             | Amorphous                                               |
| Crystallite size                                                                                                          |                                                |                                         | HRTEM (KIT)                                                                                                                      | n.a.                                                    |
| Octanol-water partition coefficient                                                                                       |                                                |                                         | Determination of absorbance (ICN)                                                                                                | P <sub>OW</sub> =0                                      |
| Photocatalytic activity                                                                                                   |                                                |                                         | Rhodamin-B Bleaching/UV-B-100<br>0.05mg/ml in Water (ICN)                                                                        | none                                                    |
| Porosity                                                                                                                  |                                                | -/- or %                                | n.a.                                                                                                                             | none                                                    |
| Pour density                                                                                                              |                                                | cm3/g                                   | (BJH) Pore Size Distribution and<br>Volume by ASAP2020 (UU)                                                                      | none                                                    |
| Size distribution:<br>(suspension in<br>water)                                                                            | Modal value X <sub>M</sub> (PDI)               | nm                                      | Zetasizer Nano ZS /UCD<br><br>UNIVLEEDS<br><br>DCS (UCD) (RWtAv / RNumAv)                                                        | 153.7 (PDI:0.041)<br>NM: 132.8<br><br>144.3 (PDI:0.020) |
|                                                                                                                           | Total concentration                            | mg/ml                                   |                                                                                                                                  | 10                                                      |
| Size distribution:<br>(Aerosol)                                                                                           | Modal value X <sub>M</sub> (σ <sub>geo</sub> ) | nm                                      | SMPS TSI. DMA 3071 with CPC<br>3022A / KIT<br>dispersed by electrospray                                                          | 168.5 (σ <sub>geo</sub> =1.09)                          |
|                                                                                                                           | Total concentration                            | mg/cm <sup>3</sup> or #/cm <sup>3</sup> |                                                                                                                                  | 1.5x 10 <sup>4</sup> /cm <sup>3</sup>                   |
| Solubility in _____                                                                                                       |                                                | g/l                                     |                                                                                                                                  |                                                         |
| Solubility in H <sub>2</sub> O                                                                                            |                                                | g/l                                     | Extraction/ ICP-MS (ICN)                                                                                                         |                                                         |
| Specific surface area                                                                                                     |                                                | m <sup>2</sup> /g                       | BET by ASAP2020 (UU)                                                                                                             | none                                                    |
| Surface chemistry                                                                                                         |                                                |                                         |                                                                                                                                  |                                                         |
| Zeta potential (surface charge)                                                                                           |                                                | mV                                      | Zetasizer Nano ZS /UU                                                                                                            | +50.7 ± 1.0<br>pH:6.1                                   |

|                                                                                                                                                                                                                                      |      |                                                                                                                                                                                                                                                                                                                                        |      |
|--------------------------------------------------------------------------------------------------------------------------------------------------------------------------------------------------------------------------------------|------|----------------------------------------------------------------------------------------------------------------------------------------------------------------------------------------------------------------------------------------------------------------------------------------------------------------------------------------|------|
| Summary of trace analyses                                                                                                                                                                                                            |      |                                                                                                                                                                                                                                                                                                                                        |      |
| Na                                                                                                                                                                                                                                   | µg/g |                                                                                                                                                                                                                                                                                                                                        | 74   |
| Ir                                                                                                                                                                                                                                   | µg/g |                                                                                                                                                                                                                                                                                                                                        | 0.12 |
| <b>Electron microscopy</b><br>Method / technical data of microscope:<br>SOP: See KIT (LEM)<br><br>Magnification: 450.000<br><br><br><br><br><br><br><br><br><br>UNIVLEEDS<br>TEM/ SEM<br><br><br><br><br><br><br><br><br><br>SEM-EDX |      |  <p>Electron Microscopy by KIT (LEM); Diameter : 30-50 nm</p>                                                                                                                                                                                       |      |
| Radical formation potential by DCF-Test:<br>(H <sub>2</sub> O <sub>2</sub> as positive control) (KIT)                                                                                                                                |      |  <p>Result: PSNP_006 induced a moderate increase of DCFH oxidation (3.1 fold of nanoparticle free control at 200 µg/ml). At high concentrations, the DCF fluorescence decreased probably due to adsorption of the dye on the particle surface.</p> |      |
| Comments and other relevant physical-chemical properties and material characterization information                                                                                                                                   |      |                                                                                                                                                                                                                                                                                                                                        |      |
| Place, Date Karlsruhe, 09.04.2013                                                                                                                                                                                                    |      | Responsible H.-R. Paur, KIT                                                                                                                                                                                                                                                                                                            |      |

## Supplemental S7: Physicochemical characterization data sheets of ceria NMs

| <b>REPRESENTATIVE TEST PARTICLES</b><br>Nanomaterial Identification<br>according to OECD<br>ENV/JM/MONO(2009)20/REV pp29. |                                      |  Research Infrastructure<br><b>QualityNano</b>               |                                                                                      |
|---------------------------------------------------------------------------------------------------------------------------|--------------------------------------|------------------------------------------------------------------------------------------------------------------------------------------------|--------------------------------------------------------------------------------------|
| Nanomaterial name <chem>CeO2</chem><br>Particle Code <chem>CeO2NP_001</chem>                                              |                                      | <b>Manufacturer /Institute/Date</b><br><b>Jordi Piella Bagaria; provided by ICN; 12/2012</b><br><b>Technology Expert:</b> Jordi Piella Bagaria |                                                                                      |
| Composition <chem>CeO2</chem><br>Method of production                      Sol Gel synthesis                              |                                      |                                                                                                                                                |                                                                                      |
| <b>Kind of suspension:</b>                                                                                                |                                      | <b>Suspension</b><br>Suspended in _____<br>pH _____<br>stabilizer _____                                                                        | <b>Powder</b><br><u>water</u><br>_____                                               |
| Property                                                                                                                  | unit                                 | Method / Institute                                                                                                                             | Value                                                                                |
| Agglomeration/aggregation                                                                                                 |                                      | HRTEM (KIT)                                                                                                                                    | Agglomerated and crystalline                                                         |
| Crystalline phase                                                                                                         |                                      | D5000 Diffractometer (UU )<br>PANalytical<br>X'Pert diffractometer (ICN)                                                                       |  |
| Crystallite size                                                                                                          |                                      | HRTEM (KIT)                                                                                                                                    |                                                                                      |
| Octanol-water partition coefficient                                                                                       |                                      | Determination of absorbance (ICN)                                                                                                              | $P_{OW}=0$                                                                           |
| Photocatalytic activity                                                                                                   |                                      | Rhodamin-B Bleaching/UV-B-100<br>0.05mg/ml in Water (ICN)                                                                                      | none                                                                                 |
| Porosity                                                                                                                  | -/- or %                             | n.a.                                                                                                                                           | n.a.                                                                                 |
| Pour density                                                                                                              | cm <sup>3</sup> /g                   | (BJH) Pore Size Distribution and<br>Volume by ASAP2020 (UU)                                                                                    | n.a.                                                                                 |
| Size distribution:<br>(suspension in water)                                                                               | Modal value $X_M$ (PDI)              | nm                                                                                                                                             | Zetasizer Nano ZS /UCD<br><br>UNIVLEEDS<br><br>DCS (UCD) (RWtAv / RNumAv)            |
|                                                                                                                           | Total concentration                  | mg/ml                                                                                                                                          | 74.03 (PDI:0.407)<br>NM: 26.31<br><br>105.5 (PDI:0.26)                               |
| Size distribution:<br>(Aerosol)                                                                                           | Modal value $X_M$ ( $\sigma_{geo}$ ) | nm                                                                                                                                             | 3.2                                                                                  |
|                                                                                                                           | Total concentration                  | mg/cm <sup>3</sup> or #/cm <sup>3</sup>                                                                                                        | 46 ( $\sigma_{geo}=1.13$ )<br><br>8.18 x 10 <sup>3</sup> /cm <sup>3</sup>            |
| Solubility in _____                                                                                                       | g/l                                  |                                                                                                                                                |                                                                                      |
| Solubility in H <sub>2</sub> O                                                                                            | g/l                                  | Extraction/ ICP-MS (ICN)                                                                                                                       |                                                                                      |
| Specific surface area                                                                                                     | m <sup>2</sup> /g                    | BET by ASAP2020 (UU)                                                                                                                           | n.a.                                                                                 |
| Surface chemistry                                                                                                         |                                      |                                                                                                                                                |                                                                                      |
| Zeta potential (surface charge)                                                                                           | mV                                   | Zetasizer Nano ZS /UU                                                                                                                          | +49.3 ± 1.3<br>pH: 3.81                                                              |

| Summary of trace analyses |      | ICP-MS / KIT | CeO | CeO <sub>2</sub> |
|---------------------------|------|--------------|-----|------------------|
| Al                        | µg/g |              | 27  | 22               |
| B                         | µg/g |              | 4   | 3                |
| Ba                        | µg/g |              | 8.2 | 6.7              |
| Ca                        | µg/g |              | 83  | 68               |
| Gd                        | µg/g |              | 19  | 16               |
| La                        | µg/g |              | 1.3 | 1.1              |
| Lu                        | µg/g |              | 0.4 | 0.3              |
| Mg                        | µg/g |              | 1.4 | 1.2              |
| Mn                        | µg/g |              | 0.3 | 0.2              |
| Nd                        | µg/g |              | 0.8 | 0.6              |
| Pb                        | µg/g |              | 0.2 | 0.1              |
| Pt                        | µg/g |              | 0.6 | 0.5              |
| Sm                        | µg/g |              | 2.0 | 1.6              |
| Sr                        | µg/g |              | 0.5 | 0.4              |
| Ti                        | µg/g |              | 41  | 33               |
| Yb                        | µg/g |              | 2.7 | 2.2              |
| Zn                        | µg/g |              | 3   | 2                |
| Zr                        | µg/g |              | 0.8 | 0.7              |

#### Electron microscopy

Method / technical data of microscope:

SOP: See KIT (LEM)

Magnification: 450.000

UNIVLEEDS

TEM



Electron Microscopy by KIT (LEM); Diameter: maximum around 10 nm



Radical formation potential by DCF-Test:

(H<sub>2</sub>O<sub>2</sub> as positive control) (KIT)



Result: CeO<sub>2</sub> NP\_001 induced a very high increase of DCFH oxidation at high concentration of 400 µg/ml (10.1 fold of nanoparticle free control).

Comments and other relevant physical-chemical properties and material characterization information

Place, Date Karlsruhe, 08.04.2013

Responsible H.-R. Paur, KIT

|                                                                                                                           |                                      |                                                                                                                                                |                                                                                      |
|---------------------------------------------------------------------------------------------------------------------------|--------------------------------------|------------------------------------------------------------------------------------------------------------------------------------------------|--------------------------------------------------------------------------------------|
| <b>REPRESENTATIVE TEST PARTICLES</b><br>Nanomaterial Identification<br>according to OECD<br>ENV/JM/MONO(2009)20/REV pp29. |                                      |  Research Infrastructure<br><b>QualityNano</b>               |                                                                                      |
| Nanomaterial name <chem>CeO2</chem><br>Particle Code <chem>CeO2</chem> NP_002                                             |                                      | <b>Manufacturer /Institute/Date</b><br><b>Jordi Piella Bagaria; provided by ICN; 12/2012</b><br><b>Technology Expert:</b> Jordi Piella Bagaria |                                                                                      |
| Composition <chem>CeO2</chem><br>Method of production       Sol Gel synthesis                                             |                                      |                                                                                                                                                |                                                                                      |
| <b>Kind of suspension:</b>                                                                                                |                                      | <b>Suspension</b><br><br>Suspended in<br>pH<br>stabilizer                                                                                      | <b>Powder</b><br><br><u>water</u><br>_____<br>none                                   |
| <b>Property</b>                                                                                                           | <b>unit</b>                          | <b>Method / Institute</b>                                                                                                                      | <b>Value</b>                                                                         |
| Agglomeration/aggregation                                                                                                 |                                      | HRTEM (KIT)                                                                                                                                    | Agglomerated and crystalline                                                         |
| Crystalline phase                                                                                                         |                                      | D5000 Diffractometer (UU)<br>PANalytical<br>X'Pert diffractometer (ICN)                                                                        |  |
| Crystallite size                                                                                                          |                                      | HRTEM (KIT)                                                                                                                                    |                                                                                      |
| Octanol-water partition coefficient                                                                                       |                                      | Determination of absorbance (ICN)                                                                                                              | $P_{OW}=0$                                                                           |
| Photocatalytic activity                                                                                                   |                                      | Rhodamin-B Bleaching/UV-B-100<br>0.05mg/ml in Water (ICN)                                                                                      | none                                                                                 |
| Porosity                                                                                                                  | -/- or %                             | n.a.                                                                                                                                           | n.a.                                                                                 |
| Pour density                                                                                                              | cm <sup>3</sup> /g                   | (BJH) Pore Size Distribution and<br>Volume by ASAP2020 (UU)                                                                                    | n.a.                                                                                 |
| Size distribution:<br>(suspension in water)                                                                               | Modal value $X_M$ (PDI)              | nm<br><br>Zetasizer Nano ZS /UCD<br><br>UNIVLEEDS<br><br>DCS (UCD) (RWtAv / RNumAv)                                                            | 138 (PDI:0.367)<br>NM: 24.65<br><br>240.3 (PDI:0.527)                                |
|                                                                                                                           | Total concentration                  | mg/ml                                                                                                                                          | 3.2                                                                                  |
| Size distribution:<br>(Aerosol)                                                                                           | Modal value $X_M$ ( $\sigma_{geo}$ ) | nm<br><br>SMPS TSI. DMA 3071 with CPC<br>3022A / KIT<br>dispersed by electrospray                                                              | 59 ( $\sigma_{geo}=1.18$ )                                                           |
|                                                                                                                           | Total concentration                  | mg/cm <sup>3</sup> or #/cm <sup>3</sup>                                                                                                        | $1.8 \times 10^4/\text{cm}^3$                                                        |
| Solubility in _____                                                                                                       | g/l                                  |                                                                                                                                                |                                                                                      |
| Solubility in H <sub>2</sub> O                                                                                            | g/l                                  | Extraction/ ICP-MS (ICN)                                                                                                                       |                                                                                      |
| Specific surface area                                                                                                     | m <sup>2</sup> /g                    | BET by ASAP2020 (UU)                                                                                                                           | n.a.                                                                                 |
| Surface chemistry                                                                                                         |                                      |                                                                                                                                                |                                                                                      |
| Zeta potential (surface charge)                                                                                           | mV                                   | Zetasizer Nano ZS /UU                                                                                                                          | +48.5 ± 1.6<br>pH: 3.69                                                              |

| Summary of trace analyses |      | ICP-MS / KIT | CeO | CeO <sub>2</sub> |
|---------------------------|------|--------------|-----|------------------|
| Al                        | µg/g |              | 27  | 22               |
| B                         | µg/g |              | 4   | 3                |
| Ba                        | µg/g |              | 8.2 | 6.7              |
| Ca                        | µg/g |              | 83  | 68               |
| Gd                        | µg/g |              | 19  | 16               |
| La                        | µg/g |              | 1.3 | 1.1              |
| Lu                        | µg/g |              | 0.4 | 0.3              |
| Mg                        | µg/g |              | 1.4 | 1.2              |
| Mn                        | µg/g |              | 0.3 | 0.2              |
| Nd                        | µg/g |              | 0.8 | 0.6              |
| Pb                        | µg/g |              | 0.2 | 0.1              |
| Pt                        | µg/g |              | 0.6 | 0.5              |
| Sm                        | µg/g |              | 2.0 | 1.6              |
| Sr                        | µg/g |              | 0.5 | 0.4              |
| Ti                        | µg/g |              | 41  | 33               |
| Yb                        | µg/g |              | 2.7 | 2.2              |
| Zn                        | µg/g |              | 3   | 2                |
| Zr                        | µg/g |              | 0.8 | 0.7              |

#### Electron microscopy

Method / technical data of microscope:  
SOP: See KIT (LEM)

Magnification: 450.000

UNIVLEEDS  
TEM



Electron Microscopy by KIT (LEM); Diameter: smaller than 10 nm



Radical formation potential by DCF-Test:  
(H<sub>2</sub>O<sub>2</sub> as positive control) (KIT)



Result: CeO<sub>2</sub> NP\_002 induced a very high increase of DCFH oxidation at high concentration of 400 µg/ml (12.4 fold of nanoparticle free control).

Comments and other relevant physical-chemical properties and material characterization information

Place, Date Karlsruhe, 08.04.2013

Responsible H.-R. Paur, KIT

|                                                                                                                           |                                      |                                                                                                                                                |                                                                                      |
|---------------------------------------------------------------------------------------------------------------------------|--------------------------------------|------------------------------------------------------------------------------------------------------------------------------------------------|--------------------------------------------------------------------------------------|
| <b>REPRESENTATIVE TEST PARTICLES</b><br>Nanomaterial Identification<br>according to OECD<br>ENV/JM/MONO(2009)20/REV pp29. |                                      |  Research Infrastructure<br><b>QualityNano</b>               |                                                                                      |
| Nanomaterial name <chem>CeO2</chem><br>Particle Code <chem>CeO2NP_003</chem>                                              |                                      | <b>Manufacturer /Institute/Date</b><br><b>Jordi Piella Bagaria; provided by ICN; 12/2012</b><br><b>Technology Expert:</b> Jordi Piella Bagaria |                                                                                      |
| Composition <chem>CeO2</chem><br>Method of production       Sol Gel synthesis                                             |                                      |                                                                                                                                                |                                                                                      |
| <b>Kind of suspension:</b>                                                                                                |                                      | <b>Suspension</b><br><br>Suspended in<br>pH<br>stabilizer                                                                                      | <b>Powder</b><br><br><u>water</u><br>_____<br>none                                   |
| <b>Property</b>                                                                                                           | <b>unit</b>                          | <b>Method / Institute</b>                                                                                                                      | <b>Value</b>                                                                         |
| Agglomeration/aggregation                                                                                                 |                                      | HRTEM (KIT)                                                                                                                                    | Agglomerated and crystalline                                                         |
| Crystalline phase                                                                                                         |                                      | D5000 Diffractometer (UU )<br>PANalytical X'Pert diffractometer (ICN)                                                                          |  |
| Crystallite size                                                                                                          |                                      | HRTEM (KIT)                                                                                                                                    |                                                                                      |
| Octanol-water partition coefficient                                                                                       |                                      | Determination of absorbance (ICN)                                                                                                              | $P_{OW}=0$                                                                           |
| Photocatalytic activity                                                                                                   |                                      | Rhodamin-B Bleaching/UV-B-100<br>0.05mg/ml in Water (ICN)                                                                                      | none                                                                                 |
| Porosity                                                                                                                  | -/- or %                             | n.a.                                                                                                                                           | n.a.                                                                                 |
| Pour density                                                                                                              | cm <sup>3</sup> /g                   | (BJH) Pore Size Distribution and<br>Volume by ASAP2020 (UU)                                                                                    | n.a.                                                                                 |
| Size distribution:<br>(suspension in<br>water)                                                                            | Modal value $X_M$ (PDI)              | nm<br><br>Zetasizer Nano ZS /UCD<br><br>UNIVLEEDS<br><br>DCS (UCD) (RWtAv / RNumAv)                                                            | 146.1 (PDI:0.423)<br>NM: 25.47<br><br>147.5 (PDI:0.347)                              |
|                                                                                                                           | Total concentration                  | mg/ml                                                                                                                                          | 3.2                                                                                  |
| Size distribution:<br>(Aerosol)                                                                                           | Modal value $X_M$ ( $\sigma_{geo}$ ) | nm<br><br>SMPS TSI. DMA 3071 with CPC<br>3022A / KIT<br>dispersed by electrospray                                                              | 40.5 ( $\sigma_{geo}=1.15$ )                                                         |
|                                                                                                                           | Total concentration                  | mg/cm <sup>3</sup> or #/cm <sup>3</sup>                                                                                                        | $3.5 \times 10^4/\text{cm}^3$                                                        |
| Solubility in _____                                                                                                       | g/l                                  |                                                                                                                                                |                                                                                      |
| Solubility in H <sub>2</sub> O                                                                                            | g/l                                  | Extraction/ ICP-MS (ICN)                                                                                                                       |                                                                                      |
| Specific surface area                                                                                                     | m <sup>2</sup> /g                    | BET by ASAP2020 (UU)                                                                                                                           | n.a.                                                                                 |
| Surface chemistry                                                                                                         |                                      |                                                                                                                                                |                                                                                      |
| Zeta potential (surface charge)                                                                                           | mV                                   | Zetasizer Nano ZS /UU                                                                                                                          | +46.4 ± 0.7<br>pH: 3.66                                                              |

| Summary of trace analyses |      | ICP-MS / KIT | CeO | CeO <sub>2</sub> |
|---------------------------|------|--------------|-----|------------------|
| Al                        | µg/g |              | 34  | 27               |
| B                         | µg/g |              | 7   | 5                |
| Ba                        | µg/g |              | 4.3 | 3.5              |
| Ca                        | µg/g |              | 139 | 113              |
| Gd                        | µg/g |              | 23  | 19               |
| La                        | µg/g |              | 1.7 | 1.4              |
| Lu                        | µg/g |              | 0.4 | 0.4              |
| Mg                        | µg/g |              | 2.9 | 2.4              |
| Mn                        | µg/g |              | 1.3 | 1.0              |
| Nd                        | µg/g |              | 0.9 | 0.7              |
| Ni                        | µg/g |              | 3.4 | 2.7              |
| Pb                        | µg/g |              | 0.3 | 0.2              |
| Pt                        | µg/g |              | 0.6 | 0.5              |
| Sm                        | µg/g |              | 2.2 | 1.8              |
| Sr                        | µg/g |              | 0.6 | 0.5              |
| Ti                        | µg/g |              | 1.7 | 1.4              |
| Yb                        | µg/g |              | 3.3 | 2.6              |
| Zn                        | µg/g |              | 5   | 4                |
| Zr                        | µg/g |              | 1.0 | 0.8              |

#### Electron microscopy

Method / technical data of microscope:

SOP: See KIT (LEM)

Magnification: 450.000

UNIVLEEDS

TEM



Electron Microscopy by KIT (LEM); Diameter : smaller than 10 nm



Radical formation potential by DCF-Test:

(H<sub>2</sub>O<sub>2</sub> as positive control) (KIT)



Result: CeO2 NP\_003 induced a very high increase of DCFH oxidation at high concentration of 400 µg/ml (11.4 fold of nanoparticle free control).

Comments and other relevant physical-chemical properties and material characterization information

Place, Date Karlsruhe, 08.04.2013

Responsible H.-R. Paur, KIT

|                                                                                                                           |                                      |                                                                                                                                                |                                                                                      |
|---------------------------------------------------------------------------------------------------------------------------|--------------------------------------|------------------------------------------------------------------------------------------------------------------------------------------------|--------------------------------------------------------------------------------------|
| <b>REPRESENTATIVE TEST PARTICLES</b><br>Nanomaterial Identification<br>according to OECD<br>ENV/JM/MONO(2009)20/REV pp29. |                                      |  Research Infrastructure<br><b>QualityNano</b>               |                                                                                      |
| Nanomaterial name <chem>CeO2</chem><br>Particle Code <chem>CeO2</chem> NP_004                                             |                                      | <b>Manufacturer /Institute/Date</b><br><b>Jordi Piella Bagaria; provided by ICN; 12/2012</b><br><b>Technology Expert:</b> Jordi Piella Bagaria |                                                                                      |
| Composition <chem>CeO2</chem><br>Method of production       Sol Gel synthesis                                             |                                      |                                                                                                                                                |                                                                                      |
| <b>Kind of suspension:</b>                                                                                                |                                      | <b>Suspension</b><br>Suspended in _____<br>pH _____<br>stabilizer _____                                                                        | <b>Powder</b><br><u>water</u><br>_____<br>none                                       |
| <b>Property</b>                                                                                                           | <b>unit</b>                          | <b>Method / Institute</b>                                                                                                                      | <b>Value</b>                                                                         |
| Agglomeration/aggregation                                                                                                 |                                      | HRTEM (KIT)                                                                                                                                    | Agglomerated and crystalline                                                         |
| Crystalline phase                                                                                                         |                                      | D5000 Diffractometer (UU)<br>PANalytical<br>X'Pert diffractometer (ICN)                                                                        |  |
| Crystallite size                                                                                                          |                                      | HRTEM (KIT)                                                                                                                                    |                                                                                      |
| Octanol-water partition coefficient                                                                                       |                                      | Determination of absorbance (ICN)                                                                                                              | $P_{OW}=0$                                                                           |
| Photocatalytic activity                                                                                                   |                                      | Rhodamin-B Bleaching/UV-B-100<br>0,05mg/ml in Water (ICN)                                                                                      | none                                                                                 |
| Porosity                                                                                                                  | -/- or %                             | n.a.                                                                                                                                           | n.a.                                                                                 |
| Pour density                                                                                                              | cm <sup>3</sup> /g                   | (BJH) Pore Size Distribution and<br>Volume by ASAP2020 (UU)                                                                                    | n.a.                                                                                 |
| Size distribution:<br>(suspension in water)                                                                               | Modal value $X_M$ (PDI)              | nm<br>Zetasizer Nano ZS /UCD<br><br>UNIVLEEDS<br><br>DCS (UCD) (RWtAv / RNumAv)                                                                | 63.21 (PDI:0.199)<br>NM: 31.86<br><br>52.7 (PDI:0.172)                               |
|                                                                                                                           | Total concentration                  | mg/ml                                                                                                                                          | 3.2                                                                                  |
| Size distribution:<br>(Aerosol)                                                                                           | Modal value $X_M$ ( $\sigma_{geo}$ ) | nm<br>SMPS TSI. DMA 3071 with CPC<br>3022A / KIT<br>dispersed by electrospray                                                                  | 74.5 ( $\sigma_{geo}=1.25$ )                                                         |
|                                                                                                                           | Total concentration                  | mg/cm <sup>3</sup> or #/cm <sup>3</sup>                                                                                                        | $3.1 \times 10^4/\text{cm}^3$                                                        |
| Solubility in _____                                                                                                       | g/l                                  |                                                                                                                                                |                                                                                      |
| Solubility in H <sub>2</sub> O                                                                                            | g/l                                  | Extraction/ ICP-MS (ICN)                                                                                                                       |                                                                                      |
| Specific surface area                                                                                                     | m <sup>2</sup> /g                    | BET by ASAP2020 (UU)                                                                                                                           | n.a.                                                                                 |
| Surface chemistry                                                                                                         |                                      |                                                                                                                                                |                                                                                      |
| Zeta potential (surface charge)                                                                                           | mV                                   | Zetasizer Nano ZS /UU                                                                                                                          | +39.2 ± 0.5<br>pH: 5.97                                                              |

| Summary of trace analyses |      | ICP-MS / KIT | CeO | CeO <sub>2</sub> |
|---------------------------|------|--------------|-----|------------------|
| Al                        | µg/g |              | 13  | 11               |
| B                         | µg/g |              | 3   | 3                |
| Ba                        | µg/g |              | 1.6 | 1.3              |
| Ca                        | µg/g |              | 43  | 35               |
| Gd                        | µg/g |              | 24  | 20               |
| La                        | µg/g |              | 1.7 | 1.4              |
| Lu                        | µg/g |              | 0.4 | 0.3              |
| Mg                        | µg/g |              | 2.8 | 2.3              |
| Nd                        | µg/g |              | 0.7 | 0.5              |
| Pb                        | µg/g |              | 0.1 | 0.06             |
| Pt                        | µg/g |              | 0.1 | 0.05             |
| Sm                        | µg/g |              | 1.7 | 1.4              |
| Sr                        | µg/g |              | 0.5 | 0.4              |
| Yb                        | µg/g |              | 3.2 | 2.6              |
| Zn                        | µg/g |              | 23  | 19               |
| Zr                        | µg/g |              | 1.1 | 0.9              |

#### Electron microscopy

Method / technical data of microscope:  
SOP: See KIT (LEM)

Magnification: 450.000

UNIVLEEDS  
TEM



Electron Microscopy by KIT (LEM); Diameter : maximum around 10 nm



Radical formation potential by DCF-Test:  
(H<sub>2</sub>O<sub>2</sub> as positive control) (KIT)



Result: CeO<sub>2</sub> NP\_004 induced a very low increase of DCFH oxidation at high concentration of 400 µg/ml (2.4 fold of nanoparticle free control).

**Comments and other relevant physical-chemical properties and material characterization information**

**Place, Date** Karlsruhe, 08.04.2013

**Responsible** H.-R. Paur, KIT

|                                                                                                                           |                                      |                                                                                                                                                |                                                                                      |
|---------------------------------------------------------------------------------------------------------------------------|--------------------------------------|------------------------------------------------------------------------------------------------------------------------------------------------|--------------------------------------------------------------------------------------|
| <b>REPRESENTATIVE TEST PARTICLES</b><br>Nanomaterial Identification<br>according to OECD<br>ENV/JM/MONO(2009)20/REV pp29. |                                      |  Research Infrastructure<br><b>QualityNano</b>               |                                                                                      |
| Nanomaterial name <chem>CeO2</chem><br>Particle Code <chem>CeO2</chem> NP_005                                             |                                      | <b>Manufacturer /Institute/Date</b><br><b>Jordi Piella Bagaria; provided by ICN; 12/2012</b><br><b>Technology Expert:</b> Jordi Piella Bagaria |                                                                                      |
| Composition <chem>CeO2</chem><br>Method of production       Sol Gel synthesis                                             |                                      |                                                                                                                                                |                                                                                      |
| <b>Kind of suspension:</b>                                                                                                |                                      | <b>Suspension</b><br>Suspended in _____<br>pH _____<br>stabilizer _____                                                                        | <b>Powder</b><br><u>water</u><br>_____<br>none                                       |
| <b>Property</b>                                                                                                           | <b>unit</b>                          | <b>Method / Institute</b>                                                                                                                      | <b>Value</b>                                                                         |
| Agglomeration/aggregation                                                                                                 |                                      | HRTEM (KIT)                                                                                                                                    | Agglomerated and crystalline                                                         |
| Crystalline phase                                                                                                         |                                      | D5000 Diffractometer (UU )<br>PANalytical<br>X'Pert diffractometer (ICN)                                                                       |  |
| Crystallite size                                                                                                          |                                      | HRTEM (KIT)                                                                                                                                    |                                                                                      |
| Octanol-water partition coefficient                                                                                       |                                      | Determination of absorbance (ICN)                                                                                                              | $P_{OW}=0$                                                                           |
| Photocatalytic activity                                                                                                   |                                      | Rhodamin-B Bleaching/UV-B-100<br>0,05mg/ml in Water (ICN)                                                                                      | none                                                                                 |
| Porosity                                                                                                                  | -/- or %                             | n.a.                                                                                                                                           | n.a.                                                                                 |
| Pour density                                                                                                              | cm <sup>3</sup> /g                   | (BJH) Pore Size Distribution and<br>Volume by ASAP2020 (UU)                                                                                    | n.a.                                                                                 |
| Size distribution:<br>(suspension in water)                                                                               | Modal value $X_M$ (PDI)              | nm<br><br>Zetasizer Nano ZS /UCD<br><br>UNIVLEEDS<br><br>DCS (UCD) (RWtAv / RNumAv)                                                            | 71.3 (PDI:0.212)<br>NM: 36.4<br><br>56.08 (PDI:0.179)                                |
|                                                                                                                           | Total concentration                  | mg/ml                                                                                                                                          | 3.2                                                                                  |
| Size distribution:<br>(Aerosol)                                                                                           | Modal value $X_M$ ( $\sigma_{geo}$ ) | nm<br><br>SMPS TSI. DMA 3071 with CPC<br>3022A / KIT<br>dispersed by electrospray                                                              | 70.0<br>( $\sigma_{geo}=1.30$ )                                                      |
|                                                                                                                           | Total concentration                  | mg/cm <sup>3</sup> or #/cm <sup>3</sup>                                                                                                        | $1.0 \times 10^4/\text{cm}^3$                                                        |
| Solubility in _____                                                                                                       | g/l                                  |                                                                                                                                                |                                                                                      |
| Solubility in H <sub>2</sub> O                                                                                            | g/l                                  | Extraction/ ICP-MS (ICN)                                                                                                                       |                                                                                      |
| Specific surface area                                                                                                     | m <sup>2</sup> /g                    | BET by ASAP2020 (UU)                                                                                                                           | n.a.                                                                                 |
| Surface chemistry                                                                                                         |                                      |                                                                                                                                                |                                                                                      |
| Zeta potential (surface charge)                                                                                           | mV                                   | Zetasizer Nano ZS /UU                                                                                                                          | +33.5 ± 4.9<br>pH: 6.04                                                              |

| Summary of trace analyses |      | ICP-MS / KIT | CeO | CeO <sub>2</sub> |
|---------------------------|------|--------------|-----|------------------|
| Al                        | µg/g |              | 10  | 8                |
| B                         | µg/g |              | 3   | 2                |
| Ba                        | µg/g |              | 1.5 | 1.2              |
| Ca                        | µg/g |              | 37  | 30               |
| Gd                        | µg/g |              | 25  | 20               |
| La                        | µg/g |              | 1.8 | 1.4              |
| Lu                        | µg/g |              | 0.4 | 0.3              |
| Nd                        | µg/g |              | 0.7 | 0.6              |
| Pb                        | µg/g |              | 0.2 | 0.2              |
| Pt                        | µg/g |              | 0.1 | 0.1              |
| Sm                        | µg/g |              | 1.7 | 1.4              |
| Yb                        | µg/g |              | 3.4 | 2.8              |
| Zn                        | µg/g |              | 24  | 19               |
| Zr                        | µg/g |              | 1.1 | 0.9              |

#### Electron microscopy

Method / technical data of microscope:  
SOP: See KIT (LEM)

Magnification: 450.000

UNIVLEEDS  
TEM



CeO2NP\_005



Electron Microscopy by KIT (LEM); Diameter: 8 to 20 nm



Radical formation potential by DCF-Test:  
(H<sub>2</sub>O<sub>2</sub> as positive control) (KIT)



Result: CeO2 NP\_005 induced a very low increase of DCFH oxidation at high concentration of 400 µg/ml (1.7 fold of nanoparticle free control).

**Comments and other relevant physical-chemical properties and material characterization information**

**Place, Date** Karlsruhe, 08.04.2013

**Responsible** H.-R. Paur, KIT

|                                                                                                                           |                                      |                                                                                                                                                |                                                                                      |
|---------------------------------------------------------------------------------------------------------------------------|--------------------------------------|------------------------------------------------------------------------------------------------------------------------------------------------|--------------------------------------------------------------------------------------|
| <b>REPRESENTATIVE TEST PARTICLES</b><br>Nanomaterial Identification<br>according to OECD<br>ENV/JM/MONO(2009)20/REV pp29. |                                      |  Research Infrastructure<br><b>QualityNano</b>               |                                                                                      |
| Nanomaterial name <chem>CeO2</chem><br>Particle Code <chem>CeO2</chem> NP_006                                             |                                      | <b>Manufacturer /Institute/Date</b><br><b>Jordi Piella Bagaria; provided by ICN; 12/2012</b><br><b>Technology Expert:</b> Jordi Piella Bagaria |                                                                                      |
| Composition <chem>CeO2</chem><br>Method of production       Sol Gel synthesis                                             |                                      |                                                                                                                                                |                                                                                      |
| <b>Kind of suspension:</b>                                                                                                |                                      | <b>Suspension</b><br>Suspended in _____<br>pH _____<br>stabilizer _____                                                                        | <b>Powder</b><br><u>water</u><br>_____                                               |
| <b>Property</b>                                                                                                           | <b>unit</b>                          | <b>Method / Institute</b>                                                                                                                      | <b>Value</b>                                                                         |
| Agglomeration/aggregation                                                                                                 |                                      | HRTEM (KIT)                                                                                                                                    | Agglomerated and crystalline                                                         |
| Crystalline phase                                                                                                         |                                      | D5000 Diffractometer (UU)<br>PANalytical<br>X'Pert diffractometer (ICN)                                                                        |  |
| Crystallite size                                                                                                          |                                      | HRTEM (KIT)                                                                                                                                    |                                                                                      |
| Octanol-water partition coefficient                                                                                       |                                      | Determination of absorbance (ICN)                                                                                                              | $P_{OW}=0$                                                                           |
| Photocatalytic activity                                                                                                   |                                      | Rhodamin-B Bleaching/UV-B-100<br>0,05mg/ml in Water (ICN)                                                                                      | none                                                                                 |
| Porosity                                                                                                                  | -/- or %                             | n.a.                                                                                                                                           | n.a.                                                                                 |
| Pour density                                                                                                              | cm <sup>3</sup> /g                   | (BJH) Pore Size Distribution and<br>Volume by ASAP2020 (UU)                                                                                    | n.a.                                                                                 |
| Size distribution:<br>(suspension in water)                                                                               | Modal value $X_M$ (PDI)              | nm<br>Zetasizer Nano ZS /UCD<br>UNIVLEEDS<br>DCS (UCD) (RWtAv / RNumAv)                                                                        | 71.6 (PDI:0.187)<br>NM: 30.21<br>63.9 (PDI:0.618)                                    |
|                                                                                                                           | Total concentration                  | mg/ml                                                                                                                                          | 3.2                                                                                  |
| Size distribution:<br>(Aerosol)                                                                                           | Modal value $X_M$ ( $\sigma_{geo}$ ) | nm<br>SMPS TSI. DMA 3071 with CPC<br>3022A / KIT<br>dispersed by electrospray                                                                  | 64.0 ( $\sigma_{geo}=1.40$ )                                                         |
|                                                                                                                           | Total concentration                  | mg/cm <sup>3</sup> or #/cm <sup>3</sup>                                                                                                        | $2.2 \times 10^4/\text{cm}^3$                                                        |
| Solubility in _____                                                                                                       | g/l                                  |                                                                                                                                                |                                                                                      |
| Solubility in H <sub>2</sub> O                                                                                            | g/l                                  | Extraction/ ICP-MS (ICN)                                                                                                                       |                                                                                      |
| Specific surface area                                                                                                     | m <sup>2</sup> /g                    | BET by ASAP2020 (UU)                                                                                                                           | n.a.                                                                                 |
| Surface chemistry                                                                                                         |                                      |                                                                                                                                                |                                                                                      |
| Zeta potential (surface charge)                                                                                           | mV                                   | Zetasizer Nano ZS /UU                                                                                                                          | +30.5 ± 2.2<br>pH: 6.04                                                              |

| Summary of trace analyses |      | ICP-MS / KIT | CeO | CeO <sub>2</sub> |
|---------------------------|------|--------------|-----|------------------|
| Al                        | µg/g |              | 7   | 6                |
| B                         | µg/g |              | 2   | 2                |
| Ba                        | µg/g |              | 2.5 | 2.0              |
| Ca                        | µg/g |              | 70  | 57               |
| Gd                        | µg/g |              | 23  | 19               |
| La                        | µg/g |              | 1.6 | 1.3              |
| Lu                        | µg/g |              | 0.4 | 0.3              |
| Nd                        | µg/g |              | 0.6 | 0.5              |
| Pb                        | µg/g |              | 0.1 | 0.1              |
| Pt                        | µg/g |              | 1.0 | 0.8              |
| Sm                        | µg/g |              | 1.4 | 1.2              |
| Ti                        | µg/g |              | 3.6 | 3.0              |
| Yb                        | µg/g |              | 3.2 | 2.6              |
| Zn                        | µg/g |              | 22  | 18               |
| Zr                        | µg/g |              | 0.9 | 0.8              |

#### Electron microscopy

Method / technical data of microscope:  
SOP: See KIT (LEM)

Magnification: 450.000

UNIVLEEDS  
TEM



Electron Microscopy by KIT (LEM); Diameter: 8 to 20 nm



Radical formation potential by DCF-Test:  
(H<sub>2</sub>O<sub>2</sub> as positive control) (KIT)



Result: CeO2 NP\_006 induced a very low increase of DCFH oxidation at high concentration of 400 µg/ml (2.0 fold of nanoparticle free control).

**Comments and other relevant physical-chemical properties and material characterization information**

**Place, Date** Karlsruhe, 08.04.2013

**Responsible** H.-R. Paur, KIT

|                                                                                                                           |                                      |                                                                                                                                                |                                                                                      |
|---------------------------------------------------------------------------------------------------------------------------|--------------------------------------|------------------------------------------------------------------------------------------------------------------------------------------------|--------------------------------------------------------------------------------------|
| <b>REPRESENTATIVE TEST PARTICLES</b><br>Nanomaterial Identification<br>according to OECD<br>ENV/JM/MONO(2009)20/REV pp29. |                                      |  Research Infrastructure<br><b>QualityNano</b>               |                                                                                      |
| Nanomaterial name <chem>CeO2</chem><br>Particle Code <chem>CeO2</chem> NP_007                                             |                                      | <b>Manufacturer /Institute/Date</b><br><b>Jordi Piella Bagaria; provided by ICN; 12/2012</b><br><b>Technology Expert:</b> Jordi Piella Bagaria |                                                                                      |
| Composition <chem>CeO2</chem><br>Method of production       Sol Gel synthesis                                             |                                      |                                                                                                                                                |                                                                                      |
| <b>Kind of suspension:</b>                                                                                                |                                      | <b>Suspension</b><br>Suspended in _____<br>pH _____<br>stabilizer _____                                                                        | <b>Powder</b><br><u>water</u><br>_____<br>none                                       |
| <b>Property</b>                                                                                                           | <b>unit</b>                          | <b>Method / Institute</b>                                                                                                                      | <b>Value</b>                                                                         |
| Agglomeration/aggregation                                                                                                 |                                      | HRTEM (KIT)                                                                                                                                    | Agglomerated and crystalline                                                         |
| Crystalline phase                                                                                                         |                                      | D5000 Diffractometer (UU)<br>PANalytical<br>X'Pert diffractometer (ICN)                                                                        |  |
| Crystallite size                                                                                                          |                                      | HRTEM (KIT)                                                                                                                                    |                                                                                      |
| Octanol-water partition coefficient                                                                                       |                                      | Determination of absorbance (ICN)                                                                                                              | $P_{OW}=0$                                                                           |
| Photocatalytic activity                                                                                                   |                                      | Rhodamin-B Bleaching/UV-B-100<br>0,05mg/ml in Water (ICN)                                                                                      | high                                                                                 |
| Porosity                                                                                                                  | -/- or %                             | n.a.                                                                                                                                           | n.a.                                                                                 |
| Pour density                                                                                                              | cm <sup>3</sup> /g                   | (BJH) Pore Size Distribution and<br>Volume by ASAP2020 (UU)                                                                                    | n.a.                                                                                 |
| Size distribution:<br>(suspension in water)                                                                               | Modal value $X_M$ (PDI)              | nm                                                                                                                                             | Zetasizer Nano ZS /UCD<br>UNIVLEEDS<br>DCS (UCD) (RWtAv / RNumAv)                    |
|                                                                                                                           | Total concentration                  | mg/ml                                                                                                                                          | 74.29 (PDI:0.204)<br>NM: 40.26<br>64.79 (PDI:0.166)<br>3.2                           |
| Size distribution:<br>(Aerosol)                                                                                           | Modal value $X_M$ ( $\sigma_{geo}$ ) | nm                                                                                                                                             | SMPS TSI. DMA 3071 with CPC<br>3022A / KIT<br>dispersed by electrospray              |
|                                                                                                                           | Total concentration                  | mg/cm <sup>3</sup> or #/cm <sup>3</sup>                                                                                                        | 71.1 ( $\sigma_{geo}=1.18$ )<br>2.2 x 10 <sup>4</sup> /cm <sup>3</sup>               |
| Solubility in _____                                                                                                       | g/l                                  |                                                                                                                                                |                                                                                      |
| Solubility in H <sub>2</sub> O                                                                                            | g/l                                  | Extraction/ ICP-MS (ICN)                                                                                                                       |                                                                                      |
| Specific surface area                                                                                                     | m <sup>2</sup> /g                    | BET by ASAP2020 (UU)                                                                                                                           | n.a.                                                                                 |
| Surface chemistry                                                                                                         |                                      |                                                                                                                                                |                                                                                      |
| Zeta potential (surface charge)                                                                                           | mV                                   | Zetasizer Nano ZS /UU                                                                                                                          | +39.3 ± 0.8<br>pH: 6.1                                                               |

| Summary of trace analyses |      | ICP-MS / KIT | CeO | CeO <sub>2</sub> |
|---------------------------|------|--------------|-----|------------------|
| Al                        | µg/g |              | 8   | 7                |
| B                         | µg/g |              | 5   | 4                |
| Ba                        | µg/g |              | 2.3 | 1.9              |
| Ca                        | µg/g |              | 53  | 43               |
| Gd                        | µg/g |              | 22  | 18               |
| La                        | µg/g |              | 1.6 | 1.3              |
| Lu                        | µg/g |              | 0.4 | 0.3              |
| Nd                        | µg/g |              | 0.6 | 0.5              |
| Pt                        | µg/g |              | 0.2 | 0.1              |
| Sm                        | µg/g |              | 1.3 | 1.1              |
| Ti                        | µg/g |              | 6.0 | 4.9              |
| Yb                        | µg/g |              | 2.8 | 2.3              |
| Zn                        | µg/g |              | 19  | 15               |
| Zr                        | µg/g |              | 0.9 | 0.8              |

#### Electron microscopy

Method / technical data of microscope:  
SOP: See KIT (LEM)

Magnification: 450.000

UNIVLEEDS  
TEM



Electron Microscopy by KIT (LEM); Diameter : Rough estimate of particle-size distribution, the maximum of the distribution seems to be between 13 to 15 nm



Radical formation potential by DCF-Test:  
(H<sub>2</sub>O<sub>2</sub> as positive control) (KIT)



Result: CeO2 NP\_007 induced a low increase of DCFH oxidation at high concentration of 400 µg/ml (2.6 fold of nanoparticle free control).

Comments and other relevant physical-chemical properties and material characterization information

Place, Date Karlsruhe, 08.04.2013

Responsible H.-R. Paur, KIT

|                                                                                                                           |                                      |                                                                                                                                                |                                                                                      |
|---------------------------------------------------------------------------------------------------------------------------|--------------------------------------|------------------------------------------------------------------------------------------------------------------------------------------------|--------------------------------------------------------------------------------------|
| <b>REPRESENTATIVE TEST PARTICLES</b><br>Nanomaterial Identification<br>according to OECD<br>ENV/JM/MONO(2009)20/REV pp29. |                                      |  <b>QualityNano</b><br>Research Infrastructure               |                                                                                      |
| Nanomaterial name <chem>CeO2</chem><br>Particle Code <chem>CeO2</chem> NP_008                                             |                                      | <b>Manufacturer /Institute/Date</b><br><b>Jordi Piella Bagaria; provided by ICN; 12/2012</b><br><b>Technology Expert:</b> Jordi Piella Bagaria |                                                                                      |
| Composition <chem>CeO2</chem><br>Method of production       Sol Gel synthesis                                             |                                      |                                                                                                                                                |                                                                                      |
| <b>Kind of suspension:</b>                                                                                                |                                      | <b>Suspension</b><br>Suspended in _____<br>pH _____<br>stabilizer _____                                                                        | <b>Powder</b><br><u>water</u><br>_____<br>none                                       |
| <b>Property</b>                                                                                                           | <b>unit</b>                          | <b>Method / Institute</b>                                                                                                                      | <b>Value</b>                                                                         |
| Agglomeration/aggregation                                                                                                 |                                      | HRTEM (KIT)                                                                                                                                    | Agglomerated and crystalline                                                         |
| Crystalline phase                                                                                                         |                                      | D5000 Diffractometer (UU)<br>PANalytical<br>X'Pert diffractometer (ICN)                                                                        |  |
| Crystallite size                                                                                                          |                                      | HRTEM (KIT)                                                                                                                                    |                                                                                      |
| Octanol-water partition coefficient                                                                                       |                                      | Determination of absorbance (ICN)                                                                                                              | $P_{OW}=0$                                                                           |
| Photocatalytic activity                                                                                                   |                                      | Rhodamin-B Bleaching/UV-B-100<br>0.05mg/ml in Water (ICN)                                                                                      | none                                                                                 |
| Porosity                                                                                                                  | -/- or %                             | n.a.                                                                                                                                           | n.a.                                                                                 |
| Pour density                                                                                                              | cm <sup>3</sup> /g                   | (BJH) Pore Size Distribution and<br>Volume by ASAP2020 (UU)                                                                                    | n.a.                                                                                 |
| Size distribution:<br>(suspension in water)                                                                               | Modal value $X_M$ (PDI)              | nm<br>Zetasizer Nano ZS /UCD<br><br>UNIVLEEDS<br><br>DCS (UCD) (RWtAv / RNumAv)                                                                | 65.34 (PDI:0.158)<br>NM: 36.9<br><br>63.61 (PDI:0.153)                               |
|                                                                                                                           | Total concentration                  | mg/ml                                                                                                                                          | 3.2                                                                                  |
| Size distribution:<br>(Aerosol)                                                                                           | Modal value $X_M$ ( $\sigma_{geo}$ ) | nm<br>SMPS TSI. DMA 3071 with CPC<br>3022A / KIT<br>dispersed by electrospray                                                                  | 65.0 ( $\sigma_{geo}=1.22$ )                                                         |
|                                                                                                                           | Total concentration                  | mg/cm <sup>3</sup> or #/cm <sup>3</sup>                                                                                                        | $8.4 \times 10^4/\text{cm}^3$                                                        |
| Solubility in _____                                                                                                       | g/l                                  |                                                                                                                                                |                                                                                      |
| Solubility in H <sub>2</sub> O                                                                                            | g/l                                  | Extraction/ ICP-MS (ICN)                                                                                                                       |                                                                                      |
| Specific surface area                                                                                                     | m <sup>2</sup> /g                    | BET by ASAP2020 (UU)                                                                                                                           | n.a.                                                                                 |
| Surface chemistry                                                                                                         |                                      |                                                                                                                                                |                                                                                      |
| Zeta potential (surface charge)                                                                                           | mV                                   | Zetasizer Nano ZS /UU                                                                                                                          | +33.5 ± 3.6<br>pH: 6.04                                                              |

| Summary of trace analyses                                                                                                                                                        |                 | ICP-MS / KIT                                                                                                                                                                                                                                                                                                                                                                                                                                                                                                                                                                                                                                                                                                                                                                                                                                                                                                                                                                                                                                                                                                                                                                                                                                                                    | CeO | CeO <sub>2</sub> |                    |                 |                |   |   |   |   |   |   |   |   |   |   |   |   |    |   |   |    |   |   |    |   |   |    |   |   |    |   |   |    |   |   |    |   |   |    |   |   |    |   |   |    |   |   |    |   |   |
|----------------------------------------------------------------------------------------------------------------------------------------------------------------------------------|-----------------|---------------------------------------------------------------------------------------------------------------------------------------------------------------------------------------------------------------------------------------------------------------------------------------------------------------------------------------------------------------------------------------------------------------------------------------------------------------------------------------------------------------------------------------------------------------------------------------------------------------------------------------------------------------------------------------------------------------------------------------------------------------------------------------------------------------------------------------------------------------------------------------------------------------------------------------------------------------------------------------------------------------------------------------------------------------------------------------------------------------------------------------------------------------------------------------------------------------------------------------------------------------------------------|-----|------------------|--------------------|-----------------|----------------|---|---|---|---|---|---|---|---|---|---|---|---|----|---|---|----|---|---|----|---|---|----|---|---|----|---|---|----|---|---|----|---|---|----|---|---|----|---|---|----|---|---|----|---|---|
| Al                                                                                                                                                                               | µg/g            |                                                                                                                                                                                                                                                                                                                                                                                                                                                                                                                                                                                                                                                                                                                                                                                                                                                                                                                                                                                                                                                                                                                                                                                                                                                                                 | 8   | 6                |                    |                 |                |   |   |   |   |   |   |   |   |   |   |   |   |    |   |   |    |   |   |    |   |   |    |   |   |    |   |   |    |   |   |    |   |   |    |   |   |    |   |   |    |   |   |    |   |   |
| B                                                                                                                                                                                | µg/g            |                                                                                                                                                                                                                                                                                                                                                                                                                                                                                                                                                                                                                                                                                                                                                                                                                                                                                                                                                                                                                                                                                                                                                                                                                                                                                 | 2   | 2                |                    |                 |                |   |   |   |   |   |   |   |   |   |   |   |   |    |   |   |    |   |   |    |   |   |    |   |   |    |   |   |    |   |   |    |   |   |    |   |   |    |   |   |    |   |   |    |   |   |
| Ba                                                                                                                                                                               | µg/g            |                                                                                                                                                                                                                                                                                                                                                                                                                                                                                                                                                                                                                                                                                                                                                                                                                                                                                                                                                                                                                                                                                                                                                                                                                                                                                 | 1.8 | 1.5              |                    |                 |                |   |   |   |   |   |   |   |   |   |   |   |   |    |   |   |    |   |   |    |   |   |    |   |   |    |   |   |    |   |   |    |   |   |    |   |   |    |   |   |    |   |   |    |   |   |
| Ca                                                                                                                                                                               | µg/g            |                                                                                                                                                                                                                                                                                                                                                                                                                                                                                                                                                                                                                                                                                                                                                                                                                                                                                                                                                                                                                                                                                                                                                                                                                                                                                 | 59  | 48               |                    |                 |                |   |   |   |   |   |   |   |   |   |   |   |   |    |   |   |    |   |   |    |   |   |    |   |   |    |   |   |    |   |   |    |   |   |    |   |   |    |   |   |    |   |   |    |   |   |
| Gd                                                                                                                                                                               | µg/g            |                                                                                                                                                                                                                                                                                                                                                                                                                                                                                                                                                                                                                                                                                                                                                                                                                                                                                                                                                                                                                                                                                                                                                                                                                                                                                 | 24  | 19               |                    |                 |                |   |   |   |   |   |   |   |   |   |   |   |   |    |   |   |    |   |   |    |   |   |    |   |   |    |   |   |    |   |   |    |   |   |    |   |   |    |   |   |    |   |   |    |   |   |
| La                                                                                                                                                                               | µg/g            |                                                                                                                                                                                                                                                                                                                                                                                                                                                                                                                                                                                                                                                                                                                                                                                                                                                                                                                                                                                                                                                                                                                                                                                                                                                                                 | 1.8 | 1.5              |                    |                 |                |   |   |   |   |   |   |   |   |   |   |   |   |    |   |   |    |   |   |    |   |   |    |   |   |    |   |   |    |   |   |    |   |   |    |   |   |    |   |   |    |   |   |    |   |   |
| Lu                                                                                                                                                                               | µg/g            |                                                                                                                                                                                                                                                                                                                                                                                                                                                                                                                                                                                                                                                                                                                                                                                                                                                                                                                                                                                                                                                                                                                                                                                                                                                                                 | 0.4 | 0.3              |                    |                 |                |   |   |   |   |   |   |   |   |   |   |   |   |    |   |   |    |   |   |    |   |   |    |   |   |    |   |   |    |   |   |    |   |   |    |   |   |    |   |   |    |   |   |    |   |   |
| Nd                                                                                                                                                                               | µg/g            |                                                                                                                                                                                                                                                                                                                                                                                                                                                                                                                                                                                                                                                                                                                                                                                                                                                                                                                                                                                                                                                                                                                                                                                                                                                                                 | 0.6 | 0.5              |                    |                 |                |   |   |   |   |   |   |   |   |   |   |   |   |    |   |   |    |   |   |    |   |   |    |   |   |    |   |   |    |   |   |    |   |   |    |   |   |    |   |   |    |   |   |    |   |   |
| Pt                                                                                                                                                                               | µg/g            |                                                                                                                                                                                                                                                                                                                                                                                                                                                                                                                                                                                                                                                                                                                                                                                                                                                                                                                                                                                                                                                                                                                                                                                                                                                                                 | 0.1 | 0.05             |                    |                 |                |   |   |   |   |   |   |   |   |   |   |   |   |    |   |   |    |   |   |    |   |   |    |   |   |    |   |   |    |   |   |    |   |   |    |   |   |    |   |   |    |   |   |    |   |   |
| Sm                                                                                                                                                                               | µg/g            |                                                                                                                                                                                                                                                                                                                                                                                                                                                                                                                                                                                                                                                                                                                                                                                                                                                                                                                                                                                                                                                                                                                                                                                                                                                                                 | 1.4 | 1.1              |                    |                 |                |   |   |   |   |   |   |   |   |   |   |   |   |    |   |   |    |   |   |    |   |   |    |   |   |    |   |   |    |   |   |    |   |   |    |   |   |    |   |   |    |   |   |    |   |   |
| Sn                                                                                                                                                                               | µg/g            |                                                                                                                                                                                                                                                                                                                                                                                                                                                                                                                                                                                                                                                                                                                                                                                                                                                                                                                                                                                                                                                                                                                                                                                                                                                                                 | 0.3 | 0.2              |                    |                 |                |   |   |   |   |   |   |   |   |   |   |   |   |    |   |   |    |   |   |    |   |   |    |   |   |    |   |   |    |   |   |    |   |   |    |   |   |    |   |   |    |   |   |    |   |   |
| Ti                                                                                                                                                                               | µg/g            |                                                                                                                                                                                                                                                                                                                                                                                                                                                                                                                                                                                                                                                                                                                                                                                                                                                                                                                                                                                                                                                                                                                                                                                                                                                                                 | 2.8 | 2.3              |                    |                 |                |   |   |   |   |   |   |   |   |   |   |   |   |    |   |   |    |   |   |    |   |   |    |   |   |    |   |   |    |   |   |    |   |   |    |   |   |    |   |   |    |   |   |    |   |   |
| Yb                                                                                                                                                                               | µg/g            |                                                                                                                                                                                                                                                                                                                                                                                                                                                                                                                                                                                                                                                                                                                                                                                                                                                                                                                                                                                                                                                                                                                                                                                                                                                                                 | 3.0 | 2.4              |                    |                 |                |   |   |   |   |   |   |   |   |   |   |   |   |    |   |   |    |   |   |    |   |   |    |   |   |    |   |   |    |   |   |    |   |   |    |   |   |    |   |   |    |   |   |    |   |   |
| Zn                                                                                                                                                                               | µg/g            |                                                                                                                                                                                                                                                                                                                                                                                                                                                                                                                                                                                                                                                                                                                                                                                                                                                                                                                                                                                                                                                                                                                                                                                                                                                                                 | 20  | 16               |                    |                 |                |   |   |   |   |   |   |   |   |   |   |   |   |    |   |   |    |   |   |    |   |   |    |   |   |    |   |   |    |   |   |    |   |   |    |   |   |    |   |   |    |   |   |    |   |   |
| Zr                                                                                                                                                                               | µg/g            |                                                                                                                                                                                                                                                                                                                                                                                                                                                                                                                                                                                                                                                                                                                                                                                                                                                                                                                                                                                                                                                                                                                                                                                                                                                                                 | 1.0 | 0.8              |                    |                 |                |   |   |   |   |   |   |   |   |   |   |   |   |    |   |   |    |   |   |    |   |   |    |   |   |    |   |   |    |   |   |    |   |   |    |   |   |    |   |   |    |   |   |    |   |   |
| <b>Electron microscopy</b><br>Method / technical data of microscope:<br>SOP: See KIT (LEM)<br><br>magnification: 450.000<br><br><br><br><br><br><br><br><br><br>UNIVLEEDS<br>TEM |                 | <div><p>CeO2NP_008</p><table border="1"><caption>Particle Size Distribution Data (Estimated)</caption><thead><tr><th>Particle size [nm]</th><th>length (Number)</th><th>width (Number)</th></tr></thead><tbody><tr><td>6</td><td>0</td><td>1</td></tr><tr><td>7</td><td>0</td><td>1</td></tr><tr><td>8</td><td>0</td><td>1</td></tr><tr><td>9</td><td>2</td><td>4</td></tr><tr><td>10</td><td>2</td><td>4</td></tr><tr><td>11</td><td>9</td><td>2</td></tr><tr><td>12</td><td>5</td><td>4</td></tr><tr><td>13</td><td>4</td><td>3</td></tr><tr><td>14</td><td>1</td><td>8</td></tr><tr><td>15</td><td>2</td><td>2</td></tr><tr><td>16</td><td>5</td><td>3</td></tr><tr><td>17</td><td>1</td><td>1</td></tr><tr><td>18</td><td>0</td><td>1</td></tr><tr><td>19</td><td>0</td><td>2</td></tr><tr><td>20</td><td>1</td><td>1</td></tr></tbody></table></div> <p>Electron Microscopy by KIT (LEM); Diameter: 5 to 20 nm</p> <div></div> |     |                  | Particle size [nm] | length (Number) | width (Number) | 6 | 0 | 1 | 7 | 0 | 1 | 8 | 0 | 1 | 9 | 2 | 4 | 10 | 2 | 4 | 11 | 9 | 2 | 12 | 5 | 4 | 13 | 4 | 3 | 14 | 1 | 8 | 15 | 2 | 2 | 16 | 5 | 3 | 17 | 1 | 1 | 18 | 0 | 1 | 19 | 0 | 2 | 20 | 1 | 1 |
| Particle size [nm]                                                                                                                                                               | length (Number) | width (Number)                                                                                                                                                                                                                                                                                                                                                                                                                                                                                                                                                                                                                                                                                                                                                                                                                                                                                                                                                                                                                                                                                                                                                                                                                                                                  |     |                  |                    |                 |                |   |   |   |   |   |   |   |   |   |   |   |   |    |   |   |    |   |   |    |   |   |    |   |   |    |   |   |    |   |   |    |   |   |    |   |   |    |   |   |    |   |   |    |   |   |
| 6                                                                                                                                                                                | 0               | 1                                                                                                                                                                                                                                                                                                                                                                                                                                                                                                                                                                                                                                                                                                                                                                                                                                                                                                                                                                                                                                                                                                                                                                                                                                                                               |     |                  |                    |                 |                |   |   |   |   |   |   |   |   |   |   |   |   |    |   |   |    |   |   |    |   |   |    |   |   |    |   |   |    |   |   |    |   |   |    |   |   |    |   |   |    |   |   |    |   |   |
| 7                                                                                                                                                                                | 0               | 1                                                                                                                                                                                                                                                                                                                                                                                                                                                                                                                                                                                                                                                                                                                                                                                                                                                                                                                                                                                                                                                                                                                                                                                                                                                                               |     |                  |                    |                 |                |   |   |   |   |   |   |   |   |   |   |   |   |    |   |   |    |   |   |    |   |   |    |   |   |    |   |   |    |   |   |    |   |   |    |   |   |    |   |   |    |   |   |    |   |   |
| 8                                                                                                                                                                                | 0               | 1                                                                                                                                                                                                                                                                                                                                                                                                                                                                                                                                                                                                                                                                                                                                                                                                                                                                                                                                                                                                                                                                                                                                                                                                                                                                               |     |                  |                    |                 |                |   |   |   |   |   |   |   |   |   |   |   |   |    |   |   |    |   |   |    |   |   |    |   |   |    |   |   |    |   |   |    |   |   |    |   |   |    |   |   |    |   |   |    |   |   |
| 9                                                                                                                                                                                | 2               | 4                                                                                                                                                                                                                                                                                                                                                                                                                                                                                                                                                                                                                                                                                                                                                                                                                                                                                                                                                                                                                                                                                                                                                                                                                                                                               |     |                  |                    |                 |                |   |   |   |   |   |   |   |   |   |   |   |   |    |   |   |    |   |   |    |   |   |    |   |   |    |   |   |    |   |   |    |   |   |    |   |   |    |   |   |    |   |   |    |   |   |
| 10                                                                                                                                                                               | 2               | 4                                                                                                                                                                                                                                                                                                                                                                                                                                                                                                                                                                                                                                                                                                                                                                                                                                                                                                                                                                                                                                                                                                                                                                                                                                                                               |     |                  |                    |                 |                |   |   |   |   |   |   |   |   |   |   |   |   |    |   |   |    |   |   |    |   |   |    |   |   |    |   |   |    |   |   |    |   |   |    |   |   |    |   |   |    |   |   |    |   |   |
| 11                                                                                                                                                                               | 9               | 2                                                                                                                                                                                                                                                                                                                                                                                                                                                                                                                                                                                                                                                                                                                                                                                                                                                                                                                                                                                                                                                                                                                                                                                                                                                                               |     |                  |                    |                 |                |   |   |   |   |   |   |   |   |   |   |   |   |    |   |   |    |   |   |    |   |   |    |   |   |    |   |   |    |   |   |    |   |   |    |   |   |    |   |   |    |   |   |    |   |   |
| 12                                                                                                                                                                               | 5               | 4                                                                                                                                                                                                                                                                                                                                                                                                                                                                                                                                                                                                                                                                                                                                                                                                                                                                                                                                                                                                                                                                                                                                                                                                                                                                               |     |                  |                    |                 |                |   |   |   |   |   |   |   |   |   |   |   |   |    |   |   |    |   |   |    |   |   |    |   |   |    |   |   |    |   |   |    |   |   |    |   |   |    |   |   |    |   |   |    |   |   |
| 13                                                                                                                                                                               | 4               | 3                                                                                                                                                                                                                                                                                                                                                                                                                                                                                                                                                                                                                                                                                                                                                                                                                                                                                                                                                                                                                                                                                                                                                                                                                                                                               |     |                  |                    |                 |                |   |   |   |   |   |   |   |   |   |   |   |   |    |   |   |    |   |   |    |   |   |    |   |   |    |   |   |    |   |   |    |   |   |    |   |   |    |   |   |    |   |   |    |   |   |
| 14                                                                                                                                                                               | 1               | 8                                                                                                                                                                                                                                                                                                                                                                                                                                                                                                                                                                                                                                                                                                                                                                                                                                                                                                                                                                                                                                                                                                                                                                                                                                                                               |     |                  |                    |                 |                |   |   |   |   |   |   |   |   |   |   |   |   |    |   |   |    |   |   |    |   |   |    |   |   |    |   |   |    |   |   |    |   |   |    |   |   |    |   |   |    |   |   |    |   |   |
| 15                                                                                                                                                                               | 2               | 2                                                                                                                                                                                                                                                                                                                                                                                                                                                                                                                                                                                                                                                                                                                                                                                                                                                                                                                                                                                                                                                                                                                                                                                                                                                                               |     |                  |                    |                 |                |   |   |   |   |   |   |   |   |   |   |   |   |    |   |   |    |   |   |    |   |   |    |   |   |    |   |   |    |   |   |    |   |   |    |   |   |    |   |   |    |   |   |    |   |   |
| 16                                                                                                                                                                               | 5               | 3                                                                                                                                                                                                                                                                                                                                                                                                                                                                                                                                                                                                                                                                                                                                                                                                                                                                                                                                                                                                                                                                                                                                                                                                                                                                               |     |                  |                    |                 |                |   |   |   |   |   |   |   |   |   |   |   |   |    |   |   |    |   |   |    |   |   |    |   |   |    |   |   |    |   |   |    |   |   |    |   |   |    |   |   |    |   |   |    |   |   |
| 17                                                                                                                                                                               | 1               | 1                                                                                                                                                                                                                                                                                                                                                                                                                                                                                                                                                                                                                                                                                                                                                                                                                                                                                                                                                                                                                                                                                                                                                                                                                                                                               |     |                  |                    |                 |                |   |   |   |   |   |   |   |   |   |   |   |   |    |   |   |    |   |   |    |   |   |    |   |   |    |   |   |    |   |   |    |   |   |    |   |   |    |   |   |    |   |   |    |   |   |
| 18                                                                                                                                                                               | 0               | 1                                                                                                                                                                                                                                                                                                                                                                                                                                                                                                                                                                                                                                                                                                                                                                                                                                                                                                                                                                                                                                                                                                                                                                                                                                                                               |     |                  |                    |                 |                |   |   |   |   |   |   |   |   |   |   |   |   |    |   |   |    |   |   |    |   |   |    |   |   |    |   |   |    |   |   |    |   |   |    |   |   |    |   |   |    |   |   |    |   |   |
| 19                                                                                                                                                                               | 0               | 2                                                                                                                                                                                                                                                                                                                                                                                                                                                                                                                                                                                                                                                                                                                                                                                                                                                                                                                                                                                                                                                                                                                                                                                                                                                                               |     |                  |                    |                 |                |   |   |   |   |   |   |   |   |   |   |   |   |    |   |   |    |   |   |    |   |   |    |   |   |    |   |   |    |   |   |    |   |   |    |   |   |    |   |   |    |   |   |    |   |   |
| 20                                                                                                                                                                               | 1               | 1                                                                                                                                                                                                                                                                                                                                                                                                                                                                                                                                                                                                                                                                                                                                                                                                                                                                                                                                                                                                                                                                                                                                                                                                                                                                               |     |                  |                    |                 |                |   |   |   |   |   |   |   |   |   |   |   |   |    |   |   |    |   |   |    |   |   |    |   |   |    |   |   |    |   |   |    |   |   |    |   |   |    |   |   |    |   |   |    |   |   |
| Radical formation potential by DCF-Test:<br>(H <sub>2</sub> O <sub>2</sub> as positive control) (KIT)                                                                            |                 | <div><p>DCF fluorescence [fold increase]</p><p>Particle concentration [µg/ml]</p><p>Result: CeO<sub>2</sub> NP_008 induced a low increase of DCFH oxidation at high concentration of 400 µg/ml (2.6 fold of nanoparticle free control).</p></div>                                                                                                                                                                                                                                                                                                                                                                                                                                                                                                                                                                                                                                                                                                                                                                                                                                                                                                                                           |     |                  |                    |                 |                |   |   |   |   |   |   |   |   |   |   |   |   |    |   |   |    |   |   |    |   |   |    |   |   |    |   |   |    |   |   |    |   |   |    |   |   |    |   |   |    |   |   |    |   |   |
| Comments and other relevant physical-chemical properties and material characterization information                                                                               |                 |                                                                                                                                                                                                                                                                                                                                                                                                                                                                                                                                                                                                                                                                                                                                                                                                                                                                                                                                                                                                                                                                                                                                                                                                                                                                                 |     |                  |                    |                 |                |   |   |   |   |   |   |   |   |   |   |   |   |    |   |   |    |   |   |    |   |   |    |   |   |    |   |   |    |   |   |    |   |   |    |   |   |    |   |   |    |   |   |    |   |   |
| Place, Date Karlsruhe, 08.04.2013                                                                                                                                                |                 | Responsible H.-R. Paur. KIT                                                                                                                                                                                                                                                                                                                                                                                                                                                                                                                                                                                                                                                                                                                                                                                                                                                                                                                                                                                                                                                                                                                                                                                                                                                     |     |                  |                    |                 |                |   |   |   |   |   |   |   |   |   |   |   |   |    |   |   |    |   |   |    |   |   |    |   |   |    |   |   |    |   |   |    |   |   |    |   |   |    |   |   |    |   |   |    |   |   |

|                                                                                                                           |                                      |                                                                                                                                                |                                                                                      |
|---------------------------------------------------------------------------------------------------------------------------|--------------------------------------|------------------------------------------------------------------------------------------------------------------------------------------------|--------------------------------------------------------------------------------------|
| <b>REPRESENTATIVE TEST PARTICLES</b><br>Nanomaterial Identification<br>according to OECD<br>ENV/JM/MONO(2009)20/REV pp29. |                                      |  Research Infrastructure<br><b>QualityNano</b>               |                                                                                      |
| Nanomaterial name <chem>CeO2</chem><br>Particle Code <chem>CeO2</chem> NP_009                                             |                                      | <b>Manufacturer /Institute/Date</b><br><b>Jordi Piella Bagaria; provided by ICN; 12/2012</b><br><b>Technology Expert:</b> Jordi Piella Bagaria |                                                                                      |
| Composition <chem>CeO2</chem><br>Method of production       Sol Gel synthesis                                             |                                      |                                                                                                                                                |                                                                                      |
| <b>Kind of suspension:</b>                                                                                                |                                      | <b>Suspension</b><br>Suspended in _____<br>pH _____<br>stabilizer _____                                                                        | <b>Powder</b><br><u>water</u><br>_____<br>none                                       |
| <b>Property</b>                                                                                                           | <b>unit</b>                          | <b>Method / Institute</b>                                                                                                                      | <b>Value</b>                                                                         |
| Agglomeration/aggregation                                                                                                 |                                      | HRTEM (KIT)                                                                                                                                    | Agglomerated and crystalline                                                         |
| Crystalline phase                                                                                                         |                                      | D5000 Diffractometer (UU)<br>PANalytical<br>X'Pert diffractometer (ICN)                                                                        |  |
| Crystallite size                                                                                                          |                                      | HRTEM (KIT)                                                                                                                                    |                                                                                      |
| Octanol-water partition coefficient                                                                                       |                                      | Determination of absorbance (ICN)                                                                                                              | $P_{OW}=0$                                                                           |
| Photocatalytic activity                                                                                                   |                                      | Rhodamin-B Bleaching/UV-B-100<br>0.05mg/ml in Water (ICN)                                                                                      | high                                                                                 |
| Porosity                                                                                                                  | -/- or %                             | n.a.                                                                                                                                           | n.a.                                                                                 |
| Pour density                                                                                                              | cm <sup>3</sup> /g                   | (BJH) Pore Size Distribution and<br>Volume by ASAP2020 (UU)                                                                                    | n.a.                                                                                 |
| Size distribution:<br>(suspension in water)                                                                               | Modal value $X_M$ (PDI)              | nm<br><br>Zetasizer Nano ZS /UCD<br><br>UNIVLEEDS<br><br>DCS (UCD) (RWtAv / RNumAv)                                                            | 71.05 (PDI:0.202)<br>NM: 42.14<br><br>56.32 (PDI:0.167)                              |
|                                                                                                                           | Total concentration                  | mg/ml                                                                                                                                          | 3.2                                                                                  |
| Size distribution:<br>(Aerosol)                                                                                           | Modal value $X_M$ ( $\sigma_{geo}$ ) | nm<br><br>SMPS TSI. DMA 3071 with CPC<br>3022A / KIT<br>dispersed by electrospray                                                              | 71.8 ( $\sigma_{geo}=1.45$ )                                                         |
|                                                                                                                           | Total concentration                  | mg/cm <sup>3</sup> or #/cm <sup>3</sup>                                                                                                        | $9.6 \times 10^4/\text{cm}^3$                                                        |
| Solubility in _____                                                                                                       | g/l                                  |                                                                                                                                                |                                                                                      |
| Solubility in H <sub>2</sub> O                                                                                            | g/l                                  | Extraction/ ICP-MS (ICN)                                                                                                                       |                                                                                      |
| Specific surface area                                                                                                     | m <sup>2</sup> /g                    | BET by ASAP2020 (UU)                                                                                                                           | n.a.                                                                                 |
| Surface chemistry                                                                                                         |                                      |                                                                                                                                                |                                                                                      |
| Zeta potential (surface charge)                                                                                           | mV                                   | Zetasizer Nano ZS /UU                                                                                                                          | +37.7 ± 0.5<br>pH: 6.1                                                               |

| Summary of trace analyses                                                                                                                                                                                                                                                                                                                   |      | ICP-MS / KIT | CeO                                | CeO <sub>2</sub> |
|---------------------------------------------------------------------------------------------------------------------------------------------------------------------------------------------------------------------------------------------------------------------------------------------------------------------------------------------|------|--------------|------------------------------------|------------------|
| Al                                                                                                                                                                                                                                                                                                                                          | µg/g |              | 11                                 | 9                |
| B                                                                                                                                                                                                                                                                                                                                           | µg/g |              | 3                                  | 2                |
| Ba                                                                                                                                                                                                                                                                                                                                          | µg/g |              | 2.2                                | 1.8              |
| Ca                                                                                                                                                                                                                                                                                                                                          | µg/g |              | 40                                 | 33               |
| Gd                                                                                                                                                                                                                                                                                                                                          | µg/g |              | 24                                 | 20               |
| La                                                                                                                                                                                                                                                                                                                                          | µg/g |              | 1.9                                | 1.5              |
| Lu                                                                                                                                                                                                                                                                                                                                          | µg/g |              | 0.4                                | 0.3              |
| Nd                                                                                                                                                                                                                                                                                                                                          | µg/g |              | 0.6                                | 0.5              |
| Pt                                                                                                                                                                                                                                                                                                                                          | µg/g |              | 0.5                                | 0.4              |
| Sm                                                                                                                                                                                                                                                                                                                                          | µg/g |              | 1.4                                | 1.2              |
| Ti                                                                                                                                                                                                                                                                                                                                          | µg/g |              | 2.4                                | 2.0              |
| Yb                                                                                                                                                                                                                                                                                                                                          | µg/g |              | 3.2                                | 2.6              |
| Zn                                                                                                                                                                                                                                                                                                                                          | µg/g |              | 20                                 | 16               |
| Zr                                                                                                                                                                                                                                                                                                                                          | µg/g |              | 1.0                                | 0.8              |
| <b>Electron microscopy</b><br>Method / technical data of microscope:<br>SOP: See KIT (LEM)<br><br>Magnification: 450.000<br><br><br><br><br><br><br><br><br><br>UNIVLEEDS<br>TEM                                                                                                                                                            |      |              |                                    |                  |
|   <p>CeO2NP_009</p> <p>Electron Microscopy by KIT (LEM); Diameter: 8 to 20 nm</p>  |      |              |                                    |                  |
| Radical formation potential by DCF-Test:<br>(H <sub>2</sub> O <sub>2</sub> as positive control) (KIT)                                                                                                                                                                                                                                       |      |              |                                    |                  |
|  <p>Result: CeO<sub>2</sub> NP_009 induced a low increase of DCFH oxidation at high concentration of 400 µg/ml (2.4 fold of nanoparticle free control).</p>                                                                                             |      |              |                                    |                  |
| <b>Comments and other relevant physical-chemical properties and material characterization information</b>                                                                                                                                                                                                                                   |      |              |                                    |                  |
| <b>Place, Date Karlsruhe, 08.04.2013</b>                                                                                                                                                                                                                                                                                                    |      |              | <b>Responsible H.-R. Paur, KIT</b> |                  |

## Supplemental S8: Comparison of B2B to JRC data

Table S8-1: Comparison of physicochemical data for the B2B Stöber synthesized Silica NM and the JRC precipitated SAS (synthetic amorphous silica)

| Particle Property                    | B2B Stöber Silica NMs                                        | NM-200, NM-201, NM-204              |
|--------------------------------------|--------------------------------------------------------------|-------------------------------------|
| Number of batches                    | 8                                                            | 3                                   |
| Trace impurities (Main elements)     | Up to 36 µg/g Na<br>Al < detection limit<br>36 to 82 µg/g Ca | > 1 µg/g Na and Al                  |
| Dissolution in water                 | < detection limit                                            | Not analyzed                        |
| Crystal structure                    | Amorphous                                                    | Amorphous                           |
| Crystal size                         | --                                                           | --                                  |
| Mobility diameter                    | 33 to 118 nm                                                 | Not analyzed                        |
| Hydrodynamic diameter (DLS)          | 25 to 120 nm                                                 | NM200: 180 to 240 nm<br>dep. on lab |
| Zeta potential (surface charge)      | -45 to -66 mV<br>(pH 8.4±0.57)                               | -30 to -40 mV<br>(pH ~8)            |
| Photocatalytic activity              | No                                                           | Not analyzed                        |
| Octanol- water partition coefficient | Not analyzed                                                 | Not analyzed                        |
| Radical formation                    | 2 – 24.2-fold                                                | < detection limit                   |
| Reference                            |                                                              | [2]                                 |

Table S8-2: Comparison of physicochemical data for the B2B flame synthesized silica NMs and the JRC fumed synthesized amorphous silica (SAS)

| Particle Property                    | B2B Flame Silica NMs       | NM-202, NM-203                      |
|--------------------------------------|----------------------------|-------------------------------------|
| Number of batches                    | 6                          | 2                                   |
| Trace impurities (Main elements)     | Up to 75 µg/g (Al)         | < detection limit                   |
| Dissolution in water                 | 6 to 10 wt %               | Not analyzed                        |
| Crystal structure                    | Amorphous                  | Amorphous                           |
| Crystal size                         | --                         | --                                  |
| Mobility diameter                    | 32 to 160 nm.              | Not analyzed                        |
| Hydrodynamic diameter (DLS)          | 200 to 380 nm              | NM200: 147 to 2453nm<br>dep. on lab |
| Zeta potential (surface charge)      | -15 to -18 mV<br>(pH ~4.3) | -30 to -40 mV<br>(pH ~8)            |
| Photocatalytic activity              | No                         | Not analyzed                        |
| Octanol- water partition coefficient | < detection limit          | Not analyzed                        |
| Radical formation                    | 2 - 6.2-fold               | < detection limit                   |
| Reference                            |                            | [2]                                 |

Table S8-3: Comparison of physicochemical data for the B2B zinc oxide NM and the JRC zinc oxide NM

| Particle Property                    | B2B Zinc oxide NMs                                                                            | NM-110, NM-111, NM-112, NM-113                         |
|--------------------------------------|-----------------------------------------------------------------------------------------------|--------------------------------------------------------|
| Number of batches                    | 9                                                                                             | 4                                                      |
| Trace impurities (Main elements)     | 7 - 77 µg/g Na<br>1.8 – 3.7 µg/g Cu<br>3 – 136 µg/g Ca<br>8 – 1080 µg/g Fe<br>19 – 60 µg/g Sr | 3 - 176 µg/g Na<br>3 – 120 µg/g Cu<br>40 – 680 µg/g Ca |
| Dissolution in water                 | 7 wt %                                                                                        | 1 - 400 wt-‰                                           |
| Crystal structure                    | Crystalline<br>hexagonal zinc oxide or<br>'Wurtzite'                                          | Crystalline                                            |
| Crystal size                         | 20 to 30 nm                                                                                   | 24 to 42 nm                                            |
| Mobility diameter                    | 25 to 55 nm                                                                                   | 278 nm (only NM-110)                                   |
| Hydrodynamic diameter (DLS)          | 130 to 900 nm                                                                                 | 253 to 508 nm                                          |
| Zeta potential (surface charge)      | -15 to +24 mV<br>(pH ~6)                                                                      | 20.2 – 24.6 mV<br>(pH not indicated)                   |
| Photocatalytic activity              | High                                                                                          | No                                                     |
| Octanol- water partition coefficient | < detection limit                                                                             | Not analyzed                                           |
| Radical formation                    | 3- to 4-fold                                                                                  | Not analyzed                                           |
| Reference                            |                                                                                               | [1]                                                    |

Table S8-4: Comparison of physicochemical data for the B2B titania NMs and the JRC titania

| Particle Property                    | Titanium dioxide NMs                                      | NM-100, NM-101, NM-102, NM-103, NM-104, NM-105               |
|--------------------------------------|-----------------------------------------------------------|--------------------------------------------------------------|
| Number of batches                    | 8                                                         | 6                                                            |
| Trace impurities (Main elements)     | Up to 96 mg/g Na                                          | > 1 mg/g Na and Al                                           |
| Dissolution in water                 | n.d.                                                      | Not analyzed                                                 |
| Crystal structure                    | Crystalline<br>anatase with small<br>fraction of brookite | Crystalline<br>anantase, rutile or<br>mixture (NM-1005)      |
| Crystal size                         | 4.5 to 6 nm                                               | < 100 nm, 57nm, > 80nm<br>depending on lab                   |
| Mobility diameter                    | 33 to 70 nm.                                              | Not analyzed                                                 |
| Hydrodynamic diameter (DLS)          | 60 to 280 nm                                              | 113 to 423 nm                                                |
| Zeta potential (surface charge)      | 33 to 40 mV<br>(pH ~10)                                   | -40mV to >30 mV<br>depending on pH<br>pH 10: ~ -25 to -40 mV |
| Photocatalytic activity              | Low                                                       | Not analyzed                                                 |
| Octanol- water partition coefficient | < detection limit                                         | Not analyzed                                                 |
| Radical formation                    | 1 - 4.8 fold                                              | Not analyzed                                                 |
| Reference                            |                                                           | [3]                                                          |

Table S8-5: Comparison of physicochemical data for the B2B Cerium dioxide NMs and the JRC Cerium dioxide

| Particle Property                    | Cerium dioxide NMs             | NM-211, NM-212, NM-213                                           |
|--------------------------------------|--------------------------------|------------------------------------------------------------------|
| Number of batches                    | 9                              | 3                                                                |
| Trace impurities (Main elements)     | 87 to 187 µg/g Ca              | 100 µg/g Ca                                                      |
| Dissolution in water                 | < detection limit              | 1.05 to 5.085 ng/g                                               |
| Crystal structure                    | Crystalline:<br>cubic lattice  | Crystalline:<br>cubic lattice                                    |
| Crystal size                         | 5 to 8 nm                      | 10.3 to 33.3 nm (NPL)<br>or 9 to 49 nm (JRC)<br>depending on lab |
| Mobility diameter                    | 40 to 74 nm.                   | Not analyzed                                                     |
| Hydrodynamic diameter (DLS)          | 63 to 146 nm                   | 213 to 349 nm                                                    |
| Zeta potential (surface charge)      | 30 to 49 mV<br>(pH 3.8 to 6.1) | -7 to +33 mV<br>(pH not indicated)                               |
| Photocatalytic activity              | No                             | No or low                                                        |
| Octanol- water partition coefficient | < detection limit              | Not analyzed                                                     |
| Radical formation                    | 2 to 12-fold                   | Not analyzed                                                     |
| Reference                            |                                | [4]                                                              |

## References

1. Singh, C.; Friedrichs, S.; Levin, M.; Birkedal, R.; Jensen, K.A.; Pojana, G.; Wohlleben, W.; Schulte, S.; Wiench, K.; Turney, T.; et al. NM-Series of Representative Manufactured Nanomaterials: Zinc Oxide NM-110, NM-111, NM-112, NM-113. Characterisation and Test Item Preparation; Publications Office of the European Union: Luxembourg, 2011.
2. Rasmussen, K.; Mech, A.; Mast, J.; Temmerman, P.-J. de; Waegeneers, N.; Steen, F. Van; Doren, E. Van; Jensen, K.A.; Birkedal, R.; Levin, M.; et al. Synthetic amorphous silicon dioxide (NM-200, NM-201, NM-202, NM-203, NM-204). Characterisation and physico-chemical properties; Publications Office of the European Union: Luxembourg, 2013.
3. Rasmussen, K.; Mast, J.; Temmerman, P.-J. de; Verleysen, E.; Waegeneers, N.; Van Steen, F.; Van Doren, E.; Jensen, K.A.; Birkedal, R.; Levin, M.; et al. Titanium dioxide, NM-100, NM-101, NM-102, NM-103, NM-104, NM-105. Characterisation and physico-chemical properties; Publications Office of the European Union: Luxembourg, 2014.
4. Singh, C.; Friedrichs, S.; Ceccone, G.; Gibson, N.; Jensen, K.A.; Levin, M.; Goenaga, H.; Carlander, D.; Rasmussen, K. Cerium Dioxide NM-211, NM-212, NM-213, characterisation and test item preparation. JRC repository: NM-series of representative manufactured nanomaterials; Publications Office of the European Union: Luxembourg, 2014.
